# Supplementary material
Source: PubMed Central journal article supplement (PMC3646626)

## Supplemental Figure Legend

**Supplemental Figure 1. Manhattan plots depicting associations between candidate SNPs and treatment discontinuation using a recessive statistical model.** Dashed line signifies level of statistical significance after Bonferroni correction ( $p=0.0003$ ). AIMSS: Aromatase inhibitor-associated musculoskeletal syndrome; HR: hazard ratio. **A.** Treatment discontinuation because of any toxicity for patients treated with either AI. **B.** Treatment discontinuation because of AIMSS for patients treated with either AI. **C.** Treatment discontinuation because of any toxicity for patients treated with letrozole. **D.** Treatment discontinuation because of AIMSS for patients treated with letrozole.

# Supplemental Figure 1A

Any toxicity

Both AIs

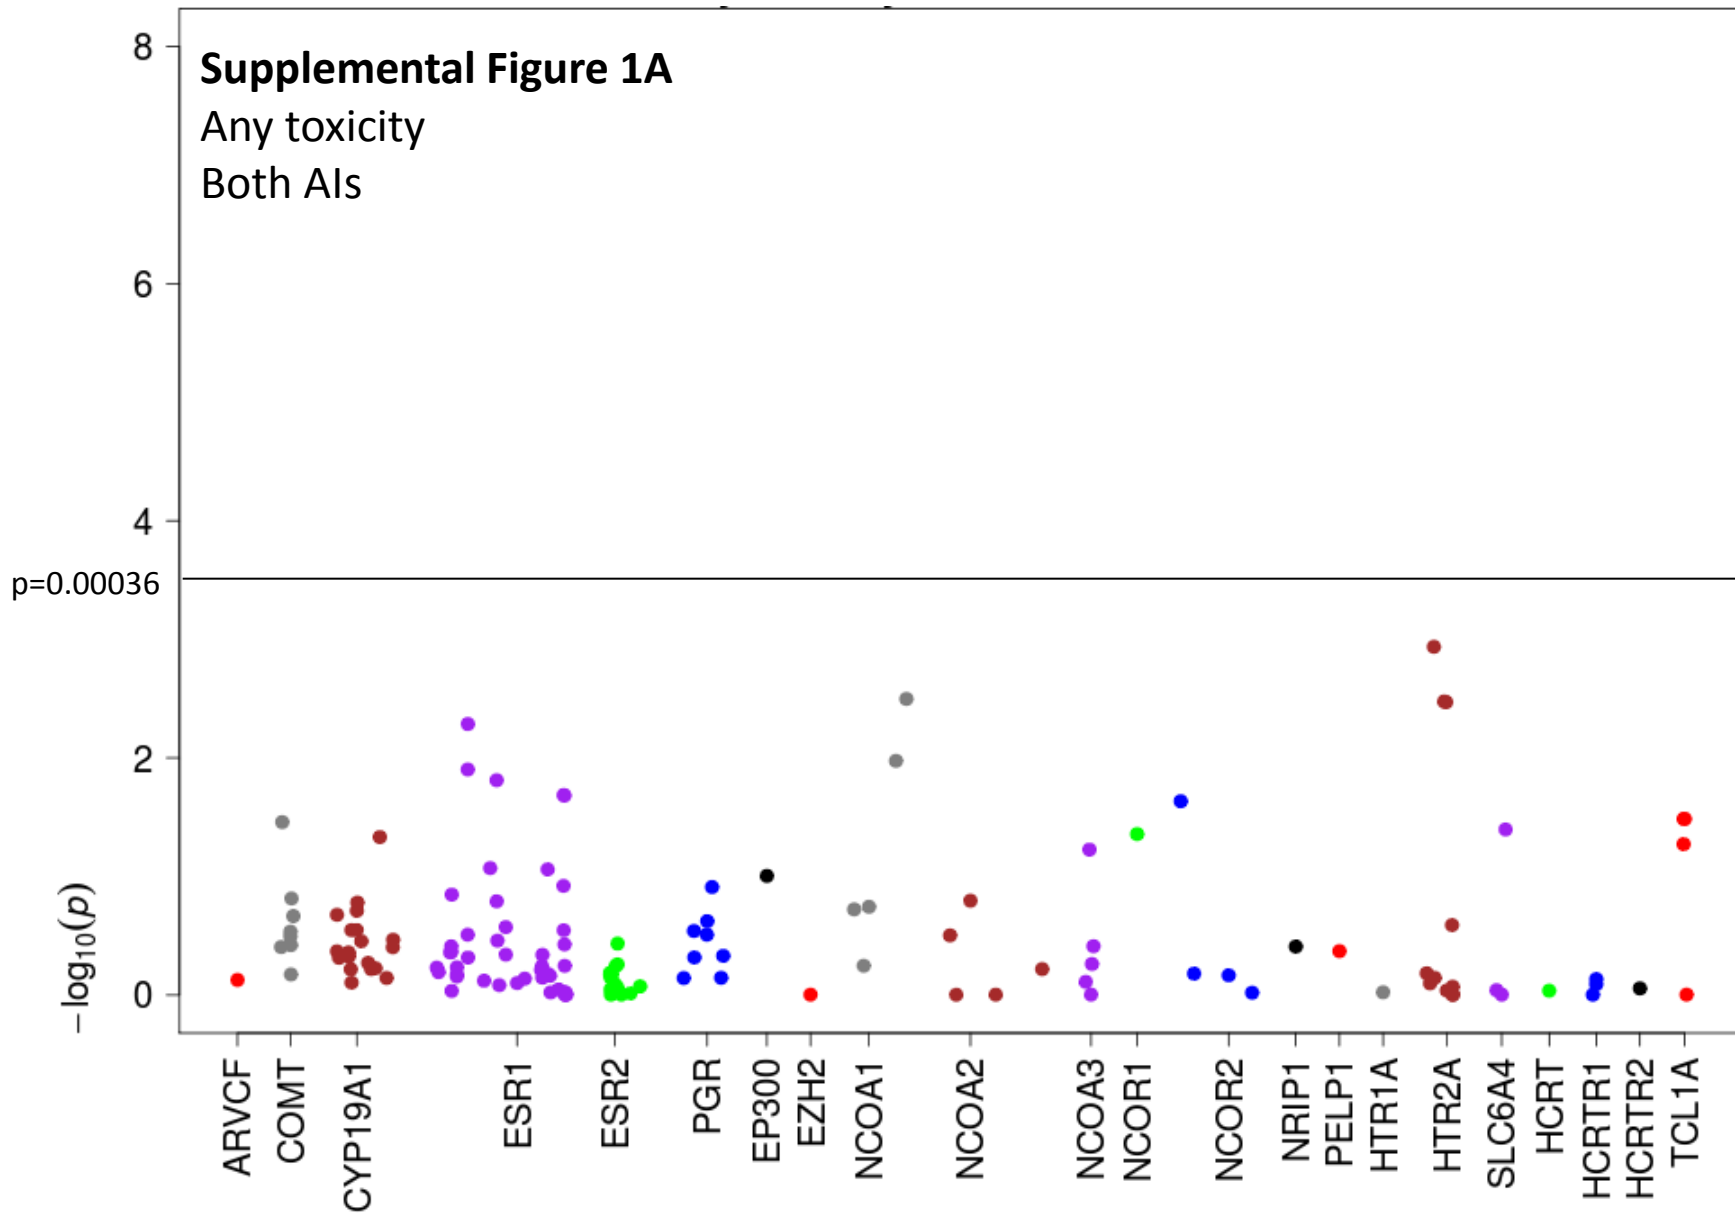

# Supplemental Figure 1B

AIMSS  
Both AIs

$p=0.00036$

$-\log_{10}(p)$

ARVCF  
COMT  
CYP19A1  
ESR1  
ESR2  
PGR  
EP300  
EZH2  
NCOA1  
NCOA2  
NCOA3  
NCOR1  
NCOR2  
NRIP1  
PELP1  
HTR1A  
HTR2A  
SLC6A4  
HCRT  
HCRTR1  
HCRTR2  
TCL1A

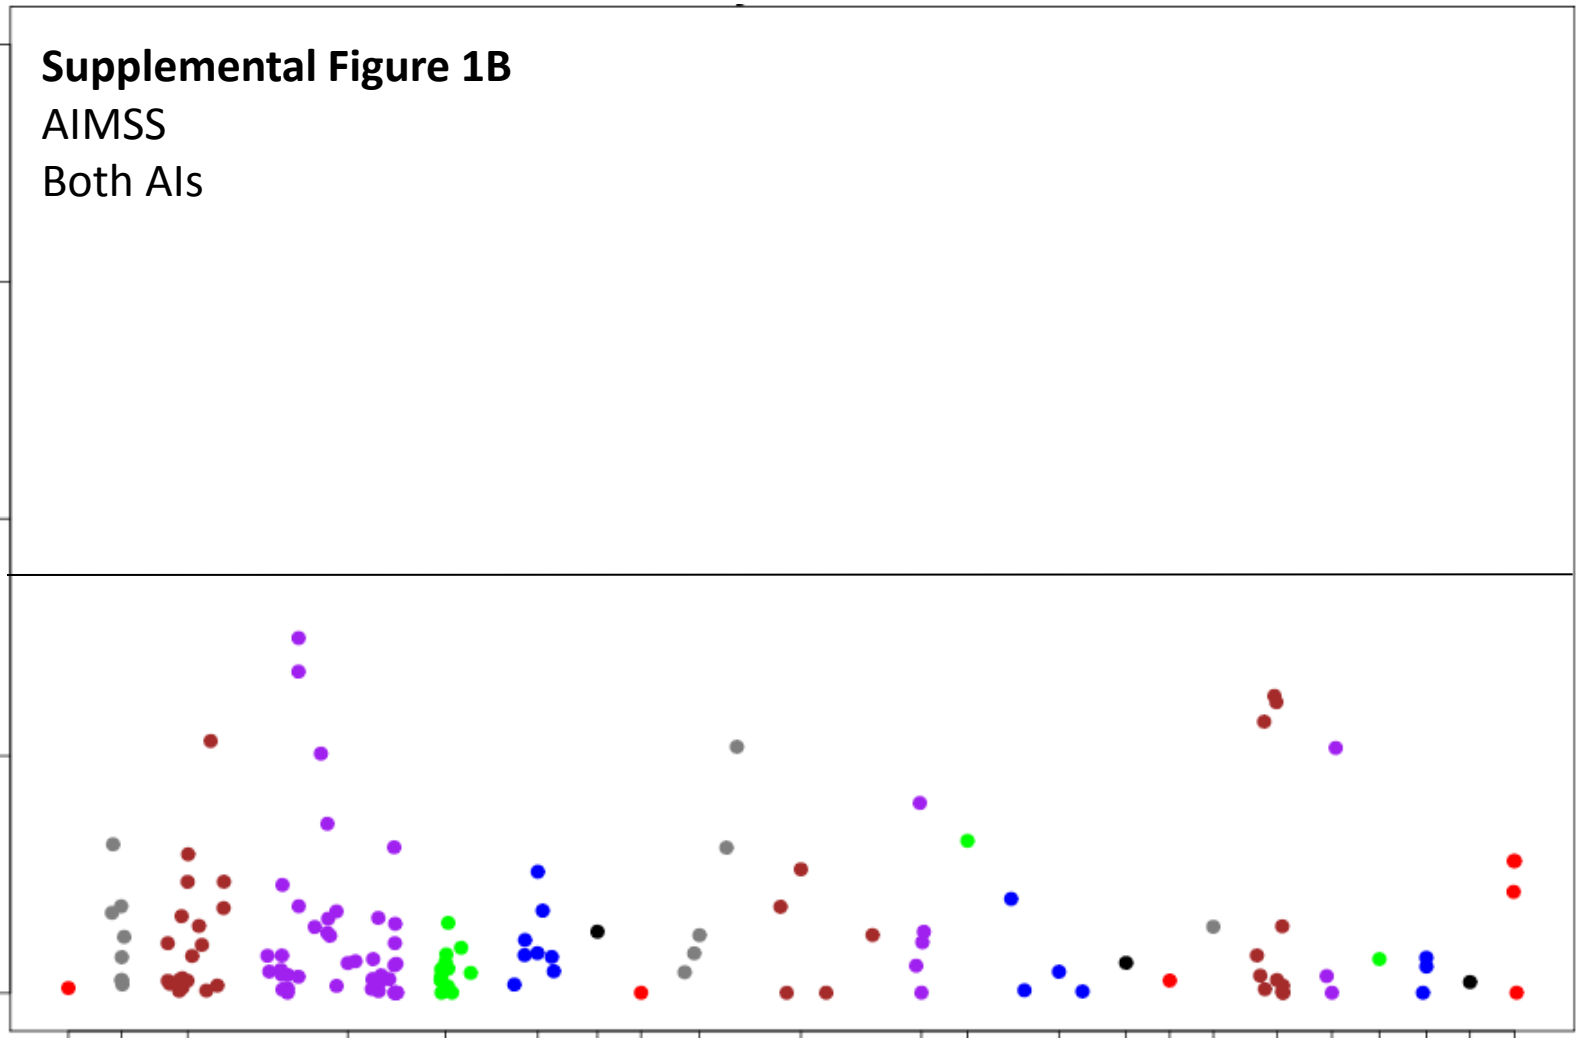

# Supplemental Figure 1C

Any toxicity

Letrozole

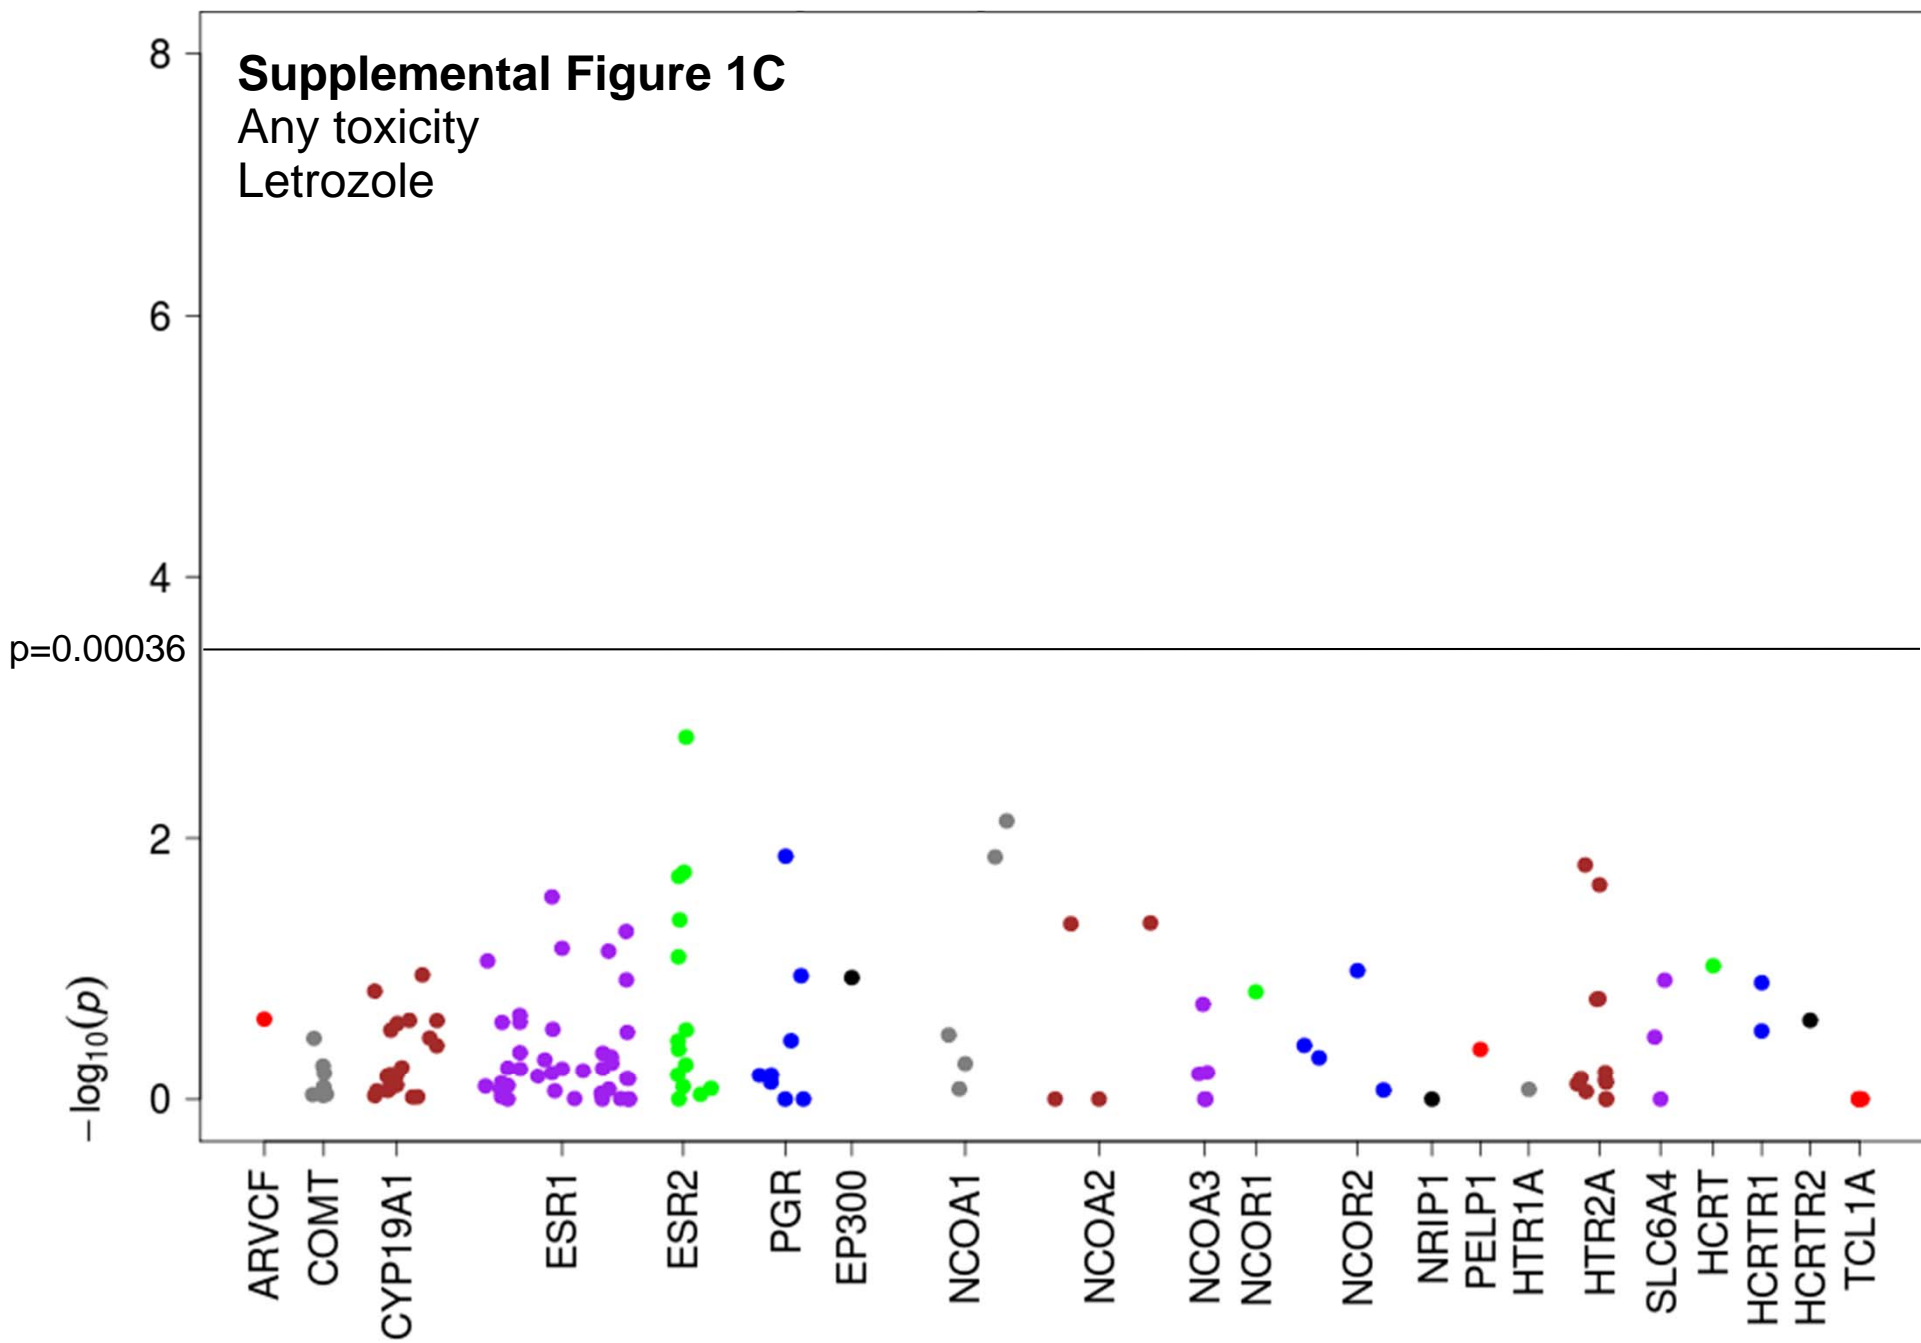

**Supplemental Figure 1D**  
AIMSS  
Letrozole

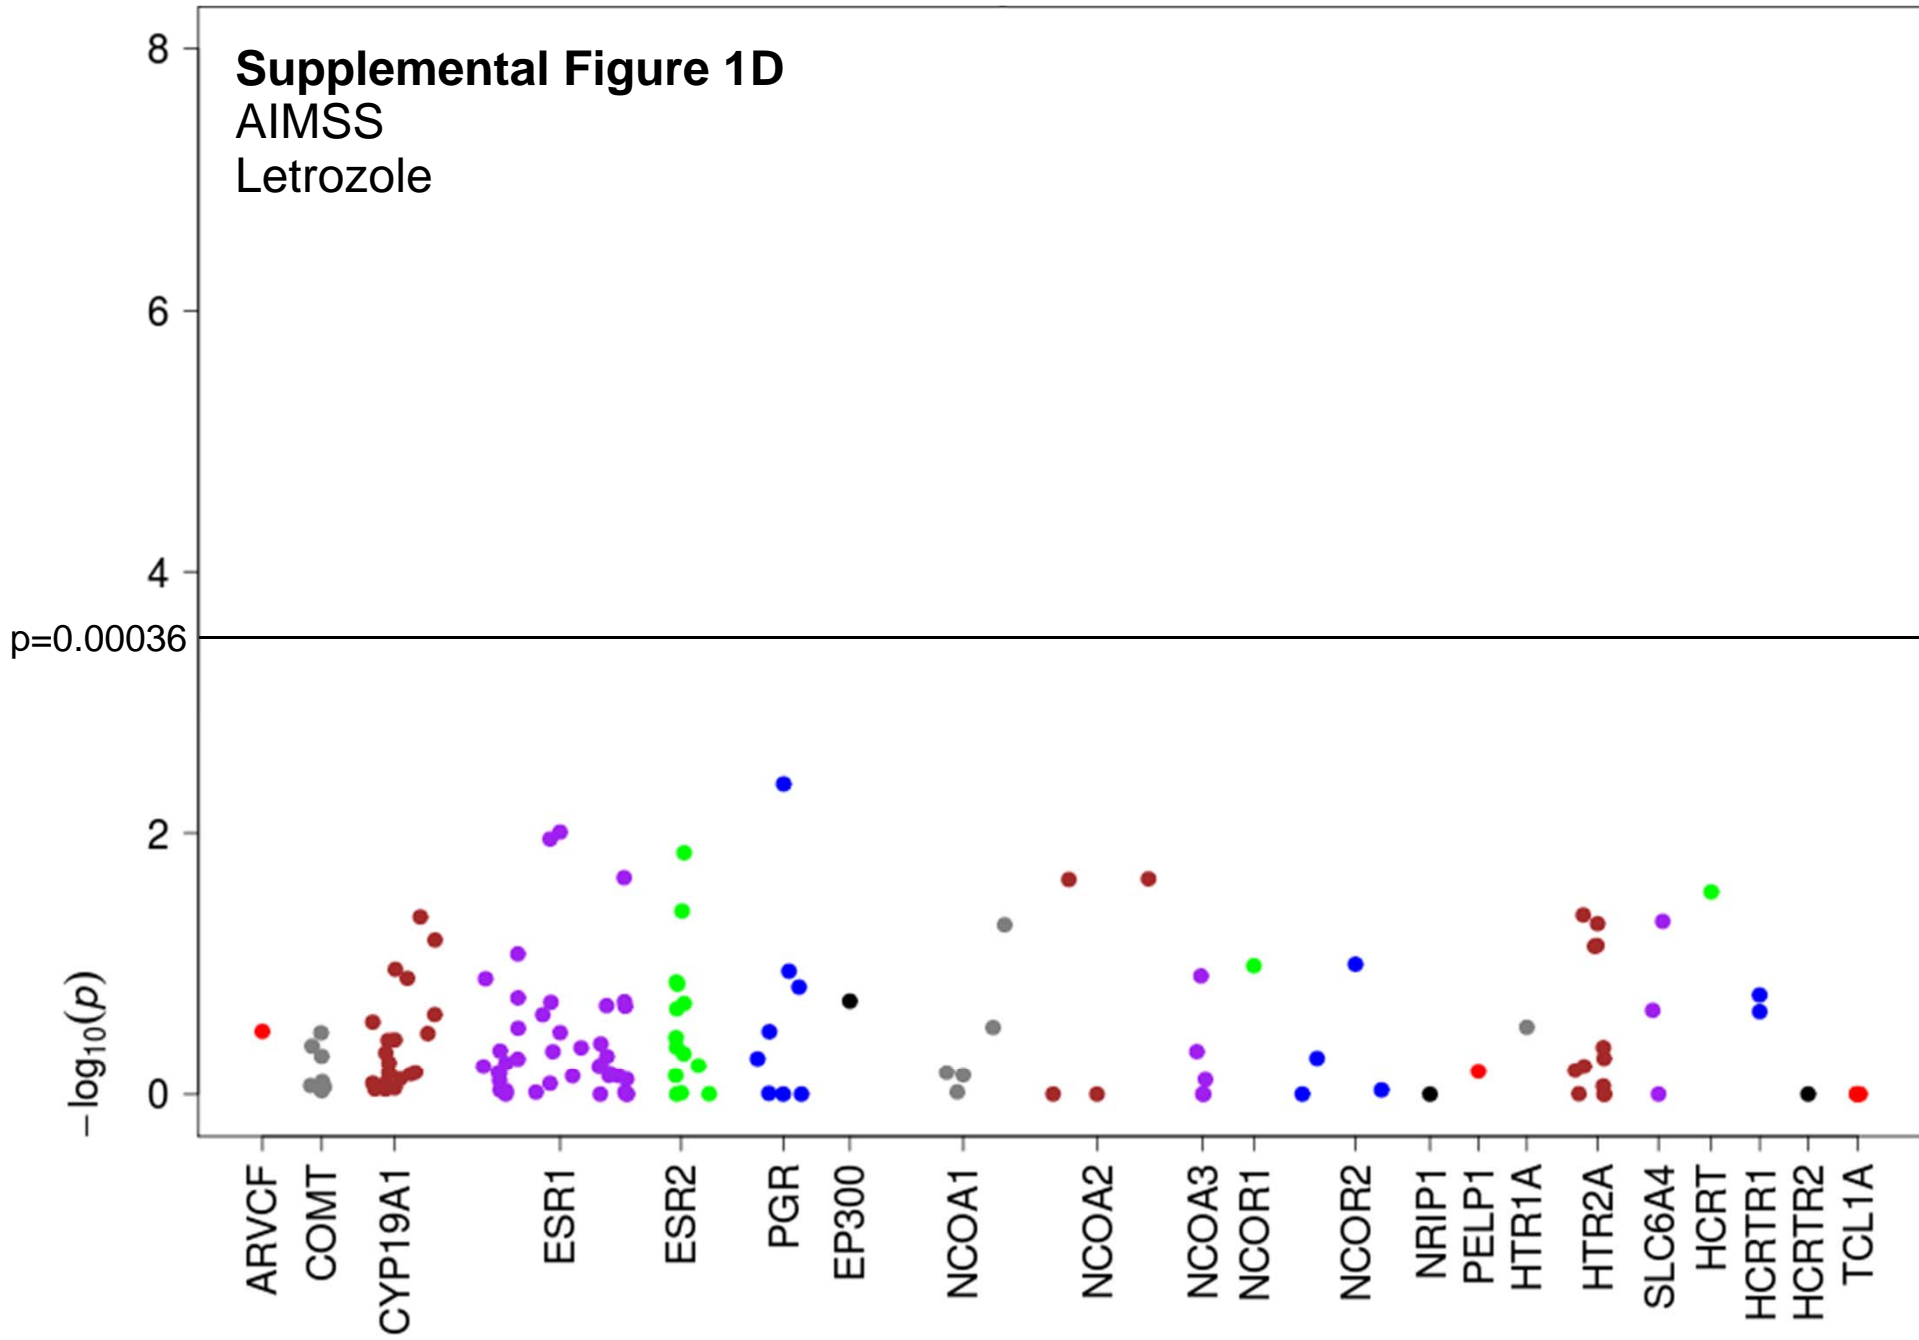

Supplement: NIHMS462885-supplement-10549_2013_2504_MOESM1_ESM.pdf [file NIHMS462885-supplement-10549_2013_2504_MOESM1_ESM.pdf]
