# Supplementary material
Source: PubMed Central journal article supplement (PMC3646626)
Supplement: NIHMS462885-supplement-10549_2013_2504_MOESM2_ESM.pdf [file NIHMS462885-supplement-10549_2013_2504_MOESM2_ESM.pdf]

Supplemental Table 1

Allele frequencies for all analyzed subjects and variants. AIMSS: Aromatase inhibitor associated musculoskeletal syndrome; MAF: minor allele frequency; No: number; SNP: single nucleotide polymorphism; Vt: variant; Wt: wildtype

| Gene    | SNP         | MAF  | Wt/Wt         |       |     | Wt/Vt         |       |     | Vt/Vt         |       |     | Missing |    |
|---------|-------------|------|---------------|-------|-----|---------------|-------|-----|---------------|-------|-----|---------|----|
|         |             |      | Geno-<br>type | %     | No  | Geno-<br>type | %     | No  | Geno-<br>type | %     | No  | %       | No |
| ARVCF   | rs165815    | 0.19 | TT            | 64.4% | 278 | TC            | 29.2% | 126 | CC            | 4.2%  | 18  | 2.3%    | 10 |
| COMT    | rs165599    | 0.35 | AA            | 41.2% | 178 | AG            | 44.4% | 192 | GG            | 12.3% | 53  | 2.1%    | 9  |
| COMT    | rs165774    | 0.30 | GG            | 50.2% | 217 | GA            | 37.3% | 161 | AA            | 10.4% | 45  | 2.1%    | 9  |
| COMT    | rs2097903   | 0.48 | AA            | 26.2% | 113 | AT            | 50.0% | 216 | TT            | 21.3% | 92  | 2.5%    | 11 |
| COMT    | rs4633      | 0.48 | CC            | 27.1% | 117 | CT            | 22.5% | 207 | TT            | 22.5% | 97  | 2.5%    | 11 |
| COMT    | rs4646310   | 0.17 | GG            | 64.8% | 280 | GA            | 25.7% | 111 | AA            | 3.2%  | 14  | 6.3%    | 27 |
| COMT    | rs4680      | 0.47 | GG            | 27.3% | 118 | GA            | 44.4% | 192 | AA            | 22.0% | 95  | 6.3%    | 27 |
| COMT    | rs4818      | 0.39 | CC            | 33.1% | 143 | CG            | 41.9% | 181 | GG            | 14.1% | 61  | 10.9%   | 47 |
| COMT    | rs6269      | 0.40 | AA            | 36.6% | 158 | AG            | 45.8% | 198 | GG            | 16.9% | 73  | 0.7%    | 3  |
| COMT    | rs933271    | 0.31 | TT            | 46.8% | 202 | TC            | 41.7% | 180 | CC            | 9.0%  | 39  | 2.5%    | 11 |
| CYP19A1 | rs10046     | 0.47 | GG            | 26.4% | 114 | GA            | 50.7% | 219 | AA            | 21.3% | 92  | 1.6%    | 7  |
| CYP19A1 | rs1008805   | 0.39 | AA            | 33.1% | 143 | AG            | 47.7% | 206 | GG            | 12.7% | 55  | 6.5%    | 28 |
| CYP19A1 | rs10459592  | 0.46 | GG            | 30.1% | 130 | GT            | 46.1% | 199 | TT            | 22.2% | 96  | 1.6%    | 7  |
| CYP19A1 | rs1062033   | 0.41 | CC            | 34.3% | 148 | CG            | 46.8% | 202 | GG            | 16.0% | 69  | 3.0%    | 13 |
| CYP19A1 | rs11575899  | 0.34 | TCT           | 45.0% | 192 | TCT/-         | 42.2% | 180 | -/            | 12.9% | 55  | 1.2%    | 5  |
| CYP19A1 | rs2008691   | 0.19 | AA            | 64.1% | 277 | AG            | 31.0% | 134 | GG            | 3.7%  | 16  | 1.2%    | 5  |
| CYP19A1 | rs2289105   | 0.48 | TT            | 26.2% | 113 | TC            | 49.5% | 214 | CC            | 21.5% | 93  | 2.8%    | 12 |
| CYP19A1 | rs2414096   | 0.46 | GG            | 24.1% | 104 | GA            | 41.9% | 181 | AA            | 17.1% | 74  | 16.9%   | 73 |
| CYP19A1 | rs28566535  | 0.10 | AA            | 80.8% | 349 | AC            | 16.0% | 69  | CC            | 2.1%  | 9   | 1.2%    | 5  |
| CYP19A1 | rs28757184# | 0.02 | GG            | 92.8% | 401 | GA            | 4.9%  | 21  | AA            | 0.0%  | 0   | 2.3%    | 10 |
| CYP19A1 | rs3759811   | 0.45 | TT            | 26.2% | 113 | TC            | 48.1% | 208 | CC            | 16.2% | 70  | 9.5%    | 41 |
| CYP19A1 | rs4646      | 0.28 | CC            | 48.8% | 211 | CA            | 42.1% | 182 | AA            | 6.7%  | 29  | 2.3%    | 10 |
| CYP19A1 | rs4774585   | 0.22 | GG            | 53.0% | 229 | GA            | 31.9% | 138 | AA            | 3.9%  | 17  | 11.1%   | 48 |
| CYP19A1 | rs4775936   | 0.42 | CC            | 32.2% | 139 | CT            | 49.5% | 214 | TT            | 17.1% | 74  | 1.2%    | 5  |
| CYP19A1 | rs6493497   | 0.13 | GG            | 67.4% | 291 | GA            | 21.5% | 93  | AA            | 0.9%  | 4   | 10.2%   | 44 |
| CYP19A1 | rs700518    | 0.45 | TT            | 28.2% | 122 | TC            | 51.6% | 223 | CC            | 18.5% | 80  | 1.6%    | 7  |
| CYP19A1 | rs7181886   | 0.09 | CC            | 77.5% | 335 | CG            | 13.4% | 58  | GG            | 1.4%  | 6   | 7.6%    | 33 |
| CYP19A1 | rs727479    | 0.34 | AA            | 43.8% | 189 | AC            | 41.0% | 177 | CC            | 12.7% | 55  | 2.5%    | 11 |
| CYP19A1 | rs730154    | 0.19 | TT            | 55.3% | 239 | TC            | 24.8% | 107 | CC            | 3.9%  | 17  | 16.0%   | 69 |
| CYP19A1 | rs749292    | 0.43 | GG            | 30.1% | 130 | GA            | 50.2% | 217 | AA            | 16.9% | 73  | 2.8%    | 12 |
| CYP19A1 | rs752760    | 0.48 | CC            | 24.8% | 107 | CT            | 44.4% | 192 | TT            | 21.5% | 93  | 9.3%    | 40 |
| CYP19A1 | rs936308    | 0.20 | CC            | 63.4% | 274 | CG            | 30.6% | 132 | GG            | 4.6%  | 20  | 1.4%    | 6  |
| EP300   | rs20551     | 0.27 | AA            | 52.3% | 226 | AG            | 38.7% | 167 | GG            | 6.7%  | 29  | 2.3%    | 10 |
| ESR1    | rs1062577   | 0.08 | TT            | 83.1% | 359 | TA            | 13.4% | 58  | AA            | 0.7%  | 3   | 2.8%    | 12 |
| ESR1    | rs11963577# | 0.00 | CC            | 99.1% | 428 | CT            | 0.2%  | 1   | TT            | 0.0%  | 0   | 0.7%    | 3  |
| ESR1    | rs1709181   | 0.45 | TT            | 25.5% | 110 | TC            | 42.8% | 185 | CC            | 17.1% | 74  | 14.6%   | 63 |
| ESR1    | rs1709182   | 0.37 | TT            | 36.1% | 156 | TC            | 40.3% | 174 | CC            | 13.2% | 57  | 10.4%   | 45 |
| ESR1    | rs1884049   | 0.24 | CC            | 54.6% | 236 | CT            | 38.4% | 166 | TT            | 4.2%  | 18  | 2.8%    | 12 |
| ESR1    | rs2077647   | 0.49 | CC            | 26.2% | 113 | CT            | 45.1% | 195 | TT            | 24.8% | 107 | 3.9%    | 17 |
| ESR1    | rs2228480   | 0.20 | GG            | 61.6% | 266 | GA            | 30.8% | 133 | AA            | 3.9%  | 17  | 3.7%    | 16 |
| ESR1    | rs2234693   | 0.49 | TT            | 23.8% | 103 | TC            | 44.7% | 193 | CC            | 22.7% | 98  | 8.8%    | 38 |
| ESR1    | rs2347868   | 0.22 | TT            | 57.9% | 250 | TC            | 34.3% | 148 | CC            | 3.9%  | 17  | 3.9%    | 17 |
| ESR1    | rs2347869   | 0.42 | AA            | 33.3% | 144 | AC            | 47.0% | 203 | CC            | 17.4% | 75  | 2.3%    | 10 |
| ESR1    | rs2747648#  | 0.03 | TT            | 91.2% | 394 | TC            | 5.6%  | 24  | CC            | 0.5%  | 2   | 2.8%    | 12 |
| ESR1    | rs2813543   | 0.24 | GG            | 58.6% | 253 | GA            | 33.8% | 146 | AA            | 7.4%  | 32  | 0.2%    | 1  |
| ESR1    | rs2982734   | 0.37 | GG            | 38.4% | 166 | GA            | 44.9% | 194 | AA            | 13.4% | 58  | 3.2%    | 14 |
| ESR1    | rs3003917   | 0.22 | AA            | 52.8% | 228 | AG            | 33.8% | 146 | GG            | 2.8%  | 12  | 10.6%   | 46 |
| ESR1    | rs3020368   | 0.09 | CC            | 79.4% | 343 | CT            | 16.0% | 69  | TT            | 0.5%  | 2   | 4.2%    | 18 |
| ESR1    | rs3020371   | 0.36 | CC            | 39.8% | 172 | CT            | 44.2% | 191 | TT            | 13.2% | 57  | 2.8%    | 12 |
| ESR1    | rs3020376*  | 0.27 | AA            | 52.8% | 228 | AG            | 24.3% | 105 | GG            | 12.3% | 53  | 10.6%   | 46 |
| ESR1    | rs3020377   | 0.37 | AA            | 38.2% | 165 | AG            | 45.8% | 198 | GG            | 13.4% | 58  | 2.5%    | 11 |
| ESR1    | rs3020410   | 0.16 | CC            | 68.3% | 295 | CA            | 29.2% | 126 | AA            | 1.2%  | 5   | 1.4%    | 6  |
| ESR1    | rs3778610*  | 0.06 | AA            | 83.1% | 359 | AG            | 6.5%  | 28  | GG            | 2.3%  | 10  | 8.1%    | 35 |
| ESR1    | rs3798565*  | 0.23 | CC            | 61.3% | 265 | CT            | 24.1% | 104 | TT            | 9.5%  | 41  | 5.1%    | 22 |
| ESR1    | rs3798577   | 0.46 | TT            | 29.4% | 127 | TC            | 48.1% | 208 | CC            | 20.8% | 90  | 1.6%    | 7  |
| ESR1    | rs3798758#  | 0.03 | CC            | 92.1% | 398 | CA            | 5.6%  | 24  | AA            | 0.2%  | 1   | 2.1%    | 9  |
| ESR1    | rs3853250   | 0.50 | TT            | 25.0% | 108 | TG            | 46.8% | 202 | GG            | 24.5% | 106 | 3.7%    | 16 |
| ESR1    | rs4870056   | 0.49 | GG            | 23.4% | 101 | GA            | 45.4% | 196 | AA            | 22.0% | 95  | 9.3%    | 40 |
| ESR1    | rs4870061   | 0.22 | CC            | 60.0% | 259 | CT            | 31.9% | 138 | TT            | 4.9%  | 21  | 3.2%    | 14 |
| ESR1    | rs4986934#  | 0.04 | CC            | 90.5% | 391 | CT            | 7.2%  | 31  | TT            | 0.0%  | 0   | 2.3%    | 10 |
| ESR1    | rs6909026#  | 0.02 | AA            | 91.2% | 394 | AG            | 4.2%  | 18  | GG            | 0.2%  | 1   | 4.4%    | 19 |
| ESR1    | rs6920483#  | 0.02 | GG            | 91.4% | 395 | GA            | 4.2%  | 18  | AA            | 0.0%  | 0   | 4.4%    | 19 |
| ESR1    | rs6930355   | 0.15 | TT            | 69.2% | 299 | TC            | 23.8% | 103 | CC            | 2.8%  | 12  | 4.2%    | 18 |
| ESR1    | rs750686    | 0.37 | GG            | 38.0% | 164 | GA            | 44.2% | 191 | AA            | 13.0% | 56  | 4.9%    | 21 |
| ESR1    | rs867239#   | 0.03 | CC            | 94.2% | 407 | CG            | 5.6%  | 24  | GG            | 0.0%  | 0   | 0.2%    | 1  |
| ESR1    | rs926848#   | 0.04 | CC            | 87.5% | 378 | CT            | 7.2%  | 31  | TT            | 0.2%  | 1   | 5.1%    | 22 |
| ESR1    | rs9322331   | 0.34 | CC            | 44.7% | 193 | CT            | 42.6% | 184 | TT            | 12.3% | 53  | 0.5%    | 2  |
| ESR1    | rs9322335   | 0.27 | CC            | 51.9% | 224 | CT            | 41.4% | 179 | TT            | 5.6%  | 24  | 1.2%    | 5  |

|        |             |      |    |       |     |    |       |     |    |       |     |       |    |
|--------|-------------|------|----|-------|-----|----|-------|-----|----|-------|-----|-------|----|
| ESR1   | rs9322336   | 0.22 | TT | 55.8% | 241 | TC | 31.7% | 137 | CC | 4.2%  | 18  | 8.3%  | 36 |
| ESR1   | rs9322338*  | 0.06 | GG | 84.3% | 364 | GA | 6.9%  | 30  | AA | 2.5%  | 11  | 6.3%  | 27 |
| ESR1   | rs9322348#  | 0.00 | CC | 98.6% | 426 | CT | 0.0%  | 0   | TT | 1.4%  | 6   | 0.0%  | 0  |
| ESR1   | rs9340799   | 0.37 | AA | 36.1% | 156 | AG | 41.7% | 180 | GG | 12.7% | 55  | 9.5%  | 41 |
| ESR1   | rs9340817#  | 0.03 | CC | 86.3% | 373 | CA | 4.2%  | 18  | AA | 0.9%  | 4   | 8.6%  | 37 |
| ESR1   | rs9340835   | 0.35 | GG | 36.8% | 159 | GA | 43.8% | 189 | AA | 10.0% | 43  | 9.5%  | 41 |
| ESR1   | rs9340941*# | 0.10 | CC | 82.4% | 356 | CT | 0.0%  | 0   | TT | 8.8%  | 38  | 8.8%  | 38 |
| ESR1   | rs9340958   | 0.07 | CC | 81.0% | 350 | CT | 12.5% | 54  | TT | 0.5%  | 2   | 6.0%  | 26 |
| ESR1   | rs9341004   | 0.11 | CC | 75.0% | 324 | CG | 18.3% | 79  | GG | 1.2%  | 5   | 5.6%  | 24 |
| ESR1   | rs9341066   | 0.07 | GG | 78.9% | 341 | GA | 12.5% | 54  | AA | 0.2%  | 1   | 8.3%  | 36 |
| ESR1   | rs9341070#  | 0.01 | CC | 97.9% | 423 | CT | 0.9%  | 4   | TT | 0.2%  | 1   | 0.9%  | 4  |
| ESR1   | rs9341072#  | 0.00 | GG | 93.5% | 404 | GA | 0.0%  | 0   | AA | 0.2%  | 1   | 6.3%  | 27 |
| ESR1   | rs9341077#  | 0.04 | TT | 90.7% | 392 | TC | 8.1%  | 35  | CC | 0.2%  | 1   | 0.9%  | 4  |
| ESR1   | rs9479188   | 0.17 | GG | 68.8% | 297 | GA | 25.9% | 112 | AA | 3.9%  | 17  | 1.4%  | 6  |
| ESR2   | rs10140457# | 0.03 | CC | 93.5% | 404 | CA | 5.1%  | 22  | AA | 0.2%  | 1   | 1.2%  | 5  |
| ESR2   | rs1256031   | 0.45 | AA | 29.2% | 126 | AG | 44.0% | 190 | GG | 19.2% | 83  | 7.6%  | 33 |
| ESR2   | rs1256049#  | 0.04 | CC | 89.8% | 388 | CT | 7.4%  | 32  | TT | 0.0%  | 0   | 2.8%  | 12 |
| ESR2   | rs1256059   | 0.42 | GG | 32.9% | 142 | GA | 43.5% | 188 | AA | 17.4% | 75  | 6.3%  | 27 |
| ESR2   | rs1256062   | 0.15 | TT | 72.5% | 313 | TC | 23.8% | 103 | CC | 2.8%  | 12  | 0.9%  | 4  |
| ESR2   | rs1256064*  | 0.16 | AA | 72.5% | 313 | AG | 20.1% | 87  | GG | 5.1%  | 22  | 2.3%  | 10 |
| ESR2   | rs17766755  | 0.34 | GG | 41.0% | 177 | GA | 41.9% | 181 | AA | 11.1% | 48  | 6.0%  | 26 |
| ESR2   | rs1952585*  | 0.13 | AA | 75.0% | 324 | AG | 17.6% | 76  | GG | 3.2%  | 14  | 4.2%  | 18 |
| ESR2   | rs2274705   | 0.12 | AA | 65.3% | 282 | AC | 16.0% | 69  | CC | 1.9%  | 8   | 16.9% | 73 |
| ESR2   | rs3020450   | 0.32 | CC | 44.4% | 192 | CT | 44.9% | 194 | TT | 9.0%  | 39  | 1.6%  | 7  |
| ESR2   | rs4986938   | 0.36 | CC | 41.9% | 181 | CT | 42.6% | 184 | TT | 13.7% | 59  | 1.9%  | 8  |
| ESR2   | rs8003490   | 0.08 | GG | 79.2% | 342 | GA | 14.6% | 63  | AA | 0.2%  | 1   | 6.0%  | 26 |
| ESR2   | rs8006145   | 0.27 | CC | 53.9% | 233 | CA | 38.0% | 164 | AA | 7.4%  | 32  | 0.7%  | 3  |
| ESR2   | rs867443    | 0.25 | GG | 55.3% | 239 | GA | 36.1% | 156 | AA | 6.7%  | 29  | 1.9%  | 8  |
| ESR2   | rs944045    | 0.09 | TT | 79.2% | 342 | TC | 13.9% | 60  | CC | 2.1%  | 9   | 4.9%  | 21 |
| ESR2   | rs944460#   | 0.05 | GG | 82.9% | 358 | GC | 7.2%  | 31  | CC | 0.7%  | 3   | 9.3%  | 40 |
| EZH2   | rs2302427   | 0.07 | CC | 84.5% | 365 | CG | 13.4% | 58  | GG | 0.2%  | 1   | 1.9%  | 8  |
| HCRT   | rs41513044# | 0.01 | AA | 95.4% | 412 | AC | 2.3%  | 10  | CC | 0.0%  | 0   | 2.3%  | 10 |
| HCRT   | rs9902709   | 0.16 | AA | 66.4% | 287 | AG | 26.9% | 116 | GG | 2.3%  | 10  | 4.4%  | 19 |
| HCRTR1 | rs11806980  | 0.05 | TT | 88.7% | 383 | TC | 9.0%  | 39  | CC | 0.5%  | 2   | 1.9%  | 8  |
| HCRTR1 | rs2176807   | 0.46 | CC | 28.9% | 125 | CA | 47.9% | 207 | AA | 21.3% | 92  | 1.9%  | 8  |
| HCRTR1 | rs2271933   | 0.39 | GG | 35.9% | 155 | GA | 45.8% | 198 | AA | 15.3% | 66  | 3.0%  | 13 |
| HCRTR2 | rs2653349   | 0.18 | CC | 66.2% | 286 | CT | 28.2% | 122 | TT | 3.2%  | 14  | 2.3%  | 10 |
| HTR1A  | rs1800046#  | 0.00 | GG | 98.6% | 426 | GC | 0.5%  | 2   | CC | 0.0%  | 0   | 0.9%  | 4  |
| HTR1A  | rs6295      | 0.47 | CC | 25.5% | 110 | CG | 50.0% | 216 | GG | 20.1% | 87  | 4.4%  | 19 |
| HTR2A  | rs1328685   | 0.10 | AA | 77.3% | 334 | AG | 18.5% | 80  | GG | 0.5%  | 2   | 3.7%  | 16 |
| HTR2A  | rs1805055*# | 0.13 | GG | 81.9% | 354 | GT | 6.0%  | 26  | TT | 10.0% | 43  | 2.1%  | 9  |
| HTR2A  | rs2274639   | 0.13 | CC | 73.6% | 318 | CG | 22.2% | 96  | GG | 2.1%  | 9   | 2.1%  | 9  |
| HTR2A  | rs2296972   | 0.36 | CC | 42.1% | 182 | CA | 40.5% | 175 | AA | 14.8% | 64  | 2.5%  | 11 |
| HTR2A  | rs3742278   | 0.13 | AA | 75.0% | 324 | AG | 19.4% | 84  | GG | 3.5%  | 15  | 2.1%  | 9  |
| HTR2A  | rs594242    | 0.19 | GG | 65.0% | 281 | GC | 28.2% | 122 | CC | 3.9%  | 17  | 2.8%  | 12 |
| HTR2A  | rs6306      | 0.07 | GG | 82.9% | 358 | GA | 12.7% | 55  | AA | 0.2%  | 1   | 4.2%  | 18 |
| HTR2A  | rs6308#     | 0.00 | GG | 96.5% | 417 | GA | 0.7%  | 3   | AA | 0.0%  | 0   | 2.8%  | 12 |
| HTR2A  | rs6311      | 0.43 | CC | 30.6% | 132 | CT | 47.9% | 207 | TT | 17.6% | 76  | 3.9%  | 17 |
| HTR2A  | rs6313      | 0.43 | GG | 29.9% | 129 | GA | 50.0% | 216 | AA | 17.1% | 74  | 3.0%  | 13 |
| HTR2A  | rs731779    | 0.17 | AA | 65.3% | 282 | AC | 29.6% | 128 | CC | 1.9%  | 8   | 3.2%  | 14 |
| HTR2A  | rs7997012   | 0.37 | GG | 38.7% | 167 | GA | 43.5% | 188 | AA | 14.4% | 62  | 3.5%  | 15 |
| HTR2A  | rs9567746   | 0.17 | AA | 66.0% | 285 | AG | 29.4% | 127 | GG | 1.9%  | 8   | 2.8%  | 12 |
| NCOA1  | rs11125744  | 0.14 | CC | 72.2% | 312 | CG | 20.4% | 88  | GG | 2.8%  | 12  | 4.6%  | 20 |
| NCOA1  | rs17737058  | 0.24 | CC | 55.3% | 239 | CG | 35.0% | 151 | GG | 5.1%  | 22  | 4.6%  | 20 |
| NCOA1  | rs1804645#  | 0.04 | CC | 90.0% | 389 | CT | 8.3%  | 36  | TT | 0.0%  | 0   | 1.6%  | 7  |
| NCOA1  | rs2033861   | 0.47 | GG | 25.5% | 110 | GA | 38.4% | 166 | AA | 20.6% | 89  | 15.5% | 67 |
| NCOA1  | rs2083389   | 0.26 | TT | 49.3% | 213 | TC | 35.4% | 153 | CC | 5.6%  | 24  | 9.7%  | 42 |
| NCOA1  | rs3731628   | 0.07 | AA | 85.9% | 371 | AT | 13.0% | 56  | TT | 0.0%  | 0   | 1.2%  | 5  |
| NCOA1  | rs920418    | 0.45 | GG | 30.3% | 131 | GC | 45.1% | 195 | CC | 21.5% | 93  | 3.0%  | 13 |
| NCOA2  | rs1380896   | 0.20 | CC | 56.5% | 244 | CT | 24.8% | 107 | TT | 5.1%  | 22  | 13.7% | 59 |
| NCOA2  | rs2228591#  | 0.05 | CC | 89.1% | 385 | CG | 8.8%  | 38  | GG | 0.5%  | 2   | 1.6%  | 7  |
| NCOA2  | rs2272670   | 0.25 | TT | 53.2% | 230 | TC | 33.3% | 144 | CC | 6.9%  | 30  | 6.5%  | 28 |
| NCOA2  | rs3088092   | 0.06 | AA | 83.8% | 362 | AT | 9.5%  | 41  | TT | 0.5%  | 2   | 6.3%  | 27 |
| NCOA2  | rs4738079   | 0.09 | GG | 75.0% | 324 | GA | 15.5% | 67  | AA | 0.2%  | 1   | 9.3%  | 40 |
| NCOA3  | rs2076546   | 0.10 | AA | 78.2% | 338 | AG | 18.5% | 80  | GG | 0.7%  | 3   | 2.5%  | 11 |
| NCOA3  | rs2230782   | 0.07 | GG | 82.4% | 356 | GC | 13.0% | 56  | CC | 0.5%  | 2   | 4.2%  | 18 |
| NCOA3  | rs365602    | 0.12 | CC | 66.0% | 285 | CT | 16.0% | 69  | TT | 1.9%  | 8   | 16.2% | 70 |
| NCOA3  | rs396221    | 0.45 | TT | 26.9% | 116 | TG | 51.6% | 223 | GG | 17.1% | 74  | 4.4%  | 19 |
| NCOA3  | rs6094752   | 0.06 | CC | 85.4% | 369 | CT | 10.6% | 46  | TT | 0.5%  | 2   | 3.5%  | 15 |
| NCOR1  | rs1065822   | 0.47 | TT | 29.2% | 126 | TA | 45.1% | 195 | AA | 23.8% | 103 | 1.9%  | 8  |
| NCOR1  | rs1073093#  | 0.03 | CC | 90.7% | 392 | CT | 6.5%  | 28  | TT | 0.0%  | 0   | 2.8%  | 12 |
| NCOR1  | rs61753150# | 0.02 | TT | 90.7% | 392 | TG | 3.2%  | 14  | GG | 0.0%  | 0   | 6.0%  | 26 |
| NCOR2  | rs1812730   | 0.44 | AA | 29.6% | 128 | AG | 49.8% | 215 | GG | 17.8% | 77  | 2.8%  | 12 |
| NCOR2  | rs2229840   | 0.16 | CC | 68.1% | 294 | CT | 27.8% | 120 | TT | 1.9%  | 8   | 2.3%  | 10 |

|        |            |      |    |       |     |    |       |     |    |       |    |       |    |
|--------|------------|------|----|-------|-----|----|-------|-----|----|-------|----|-------|----|
| NCOR2  | rs7978237  | 0.13 | GG | 71.8% | 310 | GA | 19.4% | 84  | AA | 2.8%  | 12 | 6.0%  | 26 |
| NCOR2  | rs837935   | 0.34 | TT | 41.7% | 180 | TC | 39.8% | 172 | CC | 12.5% | 54 | 6.0%  | 26 |
| NRIP1  | rs2229742  | 0.11 | GG | 77.8% | 336 | GC | 18.1% | 78  | CC | 1.4%  | 6  | 2.8%  | 12 |
| PELP1  | rs9436     | 0.21 | TT | 63.2% | 273 | TA | 28.7% | 124 | AA | 6.7%  | 29 | 1.4%  | 6  |
| PGR    | rs1042838  | 0.14 | CC | 73.1% | 316 | CA | 22.7% | 98  | AA | 2.3%  | 10 | 1.9%  | 8  |
| PGR    | rs11571171 | 0.31 | AA | 44.9% | 194 | AG | 42.8% | 185 | GG | 8.3%  | 36 | 3.9%  | 17 |
| PGR    | rs500760   | 0.26 | TT | 52.8% | 228 | TC | 33.6% | 145 | CC | 7.2%  | 31 | 6.5%  | 28 |
| PGR    | rs506487   | 0.33 | CC | 44.9% | 194 | CT | 41.2% | 178 | TT | 11.8% | 51 | 2.1%  | 9  |
| PGR    | rs516693   | 0.14 | CC | 70.8% | 306 | CT | 24.8% | 107 | TT | 1.2%  | 5  | 3.2%  | 14 |
| PGR    | rs518162   | 0.10 | GG | 74.1% | 320 | GA | 16.0% | 69  | AA | 1.4%  | 6  | 8.6%  | 37 |
| PGR    | rs660149   | 0.28 | CC | 48.8% | 211 | CG | 41.0% | 177 | GG | 6.9%  | 30 | 3.2%  | 14 |
| PGR    | rs7116336  | 0.09 | TT | 78.0% | 337 | TA | 14.1% | 61  | AA | 1.6%  | 7  | 6.3%  | 27 |
| SLC6A4 | rs140700   | 0.08 | CC | 83.1% | 359 | CT | 15.0% | 65  | TT | 0.5%  | 2  | 1.4%  | 6  |
| SLC6A4 | rs16965628 | 0.09 | GG | 81.0% | 350 | GC | 16.2% | 70  | CC | 0.5%  | 2  | 2.3%  | 10 |
| SLC6A4 | rs25531#   | 0.03 | AA | 91.2% | 394 | AG | 4.9%  | 21  | GG | 0.0%  | 0  | 3.9%  | 17 |
| SLC6A4 | rs25532    | 0.14 | CC | 63.4% | 274 | CT | 20.1% | 87  | TT | 1.6%  | 7  | 14.8% | 64 |
| TCL1A  | rs11849538 | 0.14 | CC | 73.1% | 316 | CG | 24.5% | 106 | GG | 1.9%  | 8  | 0.5%  | 2  |
| TCL1A  | rs2369049  | 0.18 | AA | 68.1% | 294 | AG | 26.9% | 116 | GG | 4.9%  | 21 | 0.2%  | 1  |
| TCL1A  | rs7158782  | 0.20 | AA | 65.7% | 284 | AG | 28.9% | 125 | GG | 5.1%  | 22 | 0.2%  | 1  |
| TCL1A  | rs7159713  | 0.19 | AA | 66.9% | 289 | AG | 28.0% | 121 | GG | 4.9%  | 21 | 0.2%  | 1  |

|         | # repeats  | None                |    | Any   |     |       |     |
|---------|------------|---------------------|----|-------|-----|-------|-----|
|         |            | %                   | No | %     | No  |       |     |
| CYP19A1 | rs60271534 | <b>TTTA repeats</b> | 7  | 19.9% | 85  | 80.1% | 342 |
|         |            |                     | 8  | 81.5% | 348 | 18.5% | 79  |
|         |            |                     | 10 | 98.1% | 419 | 1.9%  | 8   |
|         |            |                     | 11 | 48.7% | 208 | 51.3% | 219 |
|         |            |                     | 12 | 93.9% | 401 | 6.1%  | 26  |

\* not in Hardy-Weinberg equilibrium

# excluded from analysis (plus 8 additional SNPs not listed because MAF 0)
