# Supplementary material
Source: PubMed Central journal article supplement (PMC3646626)
Supplement: NIHMS462885-supplement-10549_2013_2504_MOESM3_ESM.pdf [file NIHMS462885-supplement-10549_2013_2504_MOESM3_ESM.pdf]

Supplemental Table 2

Discontinuation rates by genotype for all analyzed subjects and variants. AIMSS: Aromatase inhibitor associated musculoskeletal syndrome; No: number; SNP: single nucleotide polymorphism; Vt: variant; Wt: wildtype

| Gene    | SNP         | Discontinued due to any toxicity<br>(No. % of total with genotype) |       |       |        | Discontinued due to AIMSS<br>(No. % of total with genotype) |        |       |       |    |        |    |        |
|---------|-------------|--------------------------------------------------------------------|-------|-------|--------|-------------------------------------------------------------|--------|-------|-------|----|--------|----|--------|
|         |             | Wt/Wt                                                              | Wt/Vt | Vt/Vt |        | Wt/Wt                                                       | Wt/Vt  | Vt/Vt |       |    |        |    |        |
| ARVCF   | rs165815    | 108                                                                | 38.8% | 35    | 27.8%  | 7                                                           | 38.9%  | 83    | 29.9% | 27 | 21.4%  | 5  | 27.8%  |
| COMT    | rs165599    | 72                                                                 | 40.4% | 63    | 32.8%  | 15                                                          | 28.3%  | 56    | 31.5% | 47 | 24.5%  | 12 | 22.6%  |
| COMT    | rs165774    | 67                                                                 | 30.9% | 62    | 38.5%  | 20                                                          | 44.4%  | 50    | 23.0% | 53 | 32.9%  | 12 | 26.7%  |
| COMT    | rs2097903   | 39                                                                 | 34.5% | 86    | 39.8%  | 25                                                          | 27.2%  | 31    | 27.4% | 66 | 30.6%  | 19 | 20.7%  |
| COMT    | rs4633      | 33                                                                 | 28.2% | 78    | 37.7%  | 39                                                          | 40.2%  | 24    | 20.5% | 64 | 30.9%  | 27 | 27.8%  |
| COMT    | rs4646310   | 103                                                                | 36.8% | 36    | 32.4%  | 4                                                           | 28.6%  | 82    | 29.3% | 26 | 23.4%  | 2  | 14.3%  |
| COMT    | rs4680      | 37                                                                 | 31.4% | 67    | 34.9%  | 37                                                          | 38.9%  | 27    | 22.9% | 54 | 28.1%  | 26 | 27.4%  |
| COMT    | rs4818      | 50                                                                 | 35.0% | 61    | 33.7%  | 19                                                          | 31.1%  | 38    | 26.6% | 46 | 25.4%  | 13 | 21.3%  |
| COMT    | rs6269      | 58                                                                 | 36.7% | 71    | 35.9%  | 22                                                          | 30.1%  | 45    | 28.5% | 56 | 28.3%  | 15 | 20.5%  |
| COMT    | rs933271    | 80                                                                 | 39.6% | 63    | 35.0%  | 8                                                           | 20.5%  | 60    | 29.7% | 50 | 27.8%  | 6  | 15.4%  |
| CYP19A1 | rs10046     | 40                                                                 | 35.1% | 75    | 34.2%  | 35                                                          | 38.0%  | 29    | 25.4% | 61 | 27.9%  | 25 | 27.2%  |
| CYP19A1 | rs1008805   | 54                                                                 | 37.8% | 74    | 35.9%  | 15                                                          | 27.3%  | 42    | 29.4% | 57 | 27.7%  | 9  | 16.4%  |
| CYP19A1 | rs10459592  | 50                                                                 | 38.5% | 68    | 34.2%  | 33                                                          | 34.4%  | 34    | 26.2% | 57 | 28.6%  | 25 | 26.0%  |
| CYP19A1 | rs1062033   | 49                                                                 | 33.1% | 71    | 35.1%  | 27                                                          | 39.1%  | 37    | 25.0% | 57 | 28.2%  | 18 | 26.1%  |
| CYP19A1 | rs11575899  | 67                                                                 | 34.9% | 65    | 36.1%  | 18                                                          | 32.7%  | 50    | 26.0% | 54 | 30.0%  | 11 | 20.0%  |
| CYP19A1 | rs2008691   | 102                                                                | 36.8% | 41    | 30.6%  | 8                                                           | 50.0%  | 75    | 27.1% | 34 | 25.4%  | 7  | 43.8%  |
| CYP19A1 | rs2289105   | 41                                                                 | 36.3% | 72    | 33.6%  | 35                                                          | 37.6%  | 30    | 26.5% | 58 | 27.1%  | 25 | 26.9%  |
| CYP19A1 | rs2414096   | 35                                                                 | 33.7% | 62    | 34.3%  | 27                                                          | 36.5%  | 24    | 23.1% | 50 | 27.6%  | 17 | 23.0%  |
| CYP19A1 | rs28566535  | 122                                                                | 35.0% | 22    | 31.9%  | 6                                                           | 66.7%  | 89    | 25.5% | 20 | 29.0%  | 6  | 66.7%  |
| CYP19A1 | rs28757184# | 144                                                                | 35.9% | 5     | 23.8%  | 0                                                           | 0.0%   | 109   | 27.2% | 5  | 23.8%  | 0  | 0.0%   |
| CYP19A1 | rs3759811   | 38                                                                 | 33.6% | 72    | 34.6%  | 26                                                          | 37.1%  | 27    | 23.9% | 60 | 28.8%  | 16 | 22.9%  |
| CYP19A1 | rs4646      | 82                                                                 | 38.9% | 60    | 33.0%  | 7                                                           | 24.1%  | 67    | 31.8% | 41 | 22.5%  | 6  | 20.7%  |
| CYP19A1 | rs4774585   | 74                                                                 | 32.3% | 55    | 39.9%  | 7                                                           | 41.2%  | 58    | 25.3% | 39 | 28.3%  | 5  | 29.4%  |
| CYP19A1 | rs4775936   | 46                                                                 | 33.1% | 76    | 35.5%  | 29                                                          | 39.2%  | 35    | 25.2% | 62 | 29.0%  | 19 | 25.7%  |
| CYP19A1 | rs6493497   | 108                                                                | 37.1% | 26    | 28.0%  | 2                                                           | 50.0%  | 79    | 27.1% | 21 | 22.6%  | 2  | 50.0%  |
| CYP19A1 | rs700518    | 42                                                                 | 34.4% | 78    | 35.0%  | 30                                                          | 37.5%  | 31    | 25.4% | 64 | 28.7%  | 20 | 25.0%  |
| CYP19A1 | rs7181886   | 119                                                                | 35.5% | 21    | 36.2%  | 3                                                           | 50.0%  | 88    | 26.3% | 18 | 31.0%  | 3  | 50.0%  |
| CYP19A1 | rs727479    | 70                                                                 | 37.0% | 62    | 35.0%  | 18                                                          | 32.7%  | 52    | 27.5% | 52 | 29.4%  | 11 | 20.0%  |
| CYP19A1 | rs730154    | 83                                                                 | 34.7% | 37    | 34.6%  | 5                                                           | 29.4%  | 59    | 24.7% | 32 | 29.9%  | 5  | 29.4%  |
| CYP19A1 | rs749292    | 43                                                                 | 33.1% | 76    | 35.0%  | 28                                                          | 38.4%  | 32    | 24.6% | 60 | 27.6%  | 21 | 28.8%  |
| CYP19A1 | rs752760    | 38                                                                 | 35.5% | 66    | 34.4%  | 37                                                          | 39.8%  | 31    | 29.0% | 44 | 22.9%  | 31 | 33.3%  |
| CYP19A1 | rs936308    | 99                                                                 | 36.1% | 42    | 31.8%  | 8                                                           | 40.0%  | 72    | 26.3% | 35 | 26.5%  | 7  | 35.0%  |
| EP300   | rs20551     | 78                                                                 | 34.5% | 62    | 37.1%  | 6                                                           | 20.7%  | 59    | 26.1% | 48 | 28.7%  | 6  | 20.7%  |
| ESR1    | rs1062577   | 130                                                                | 36.2% | 17    | 29.3%  | 0                                                           | 0.0%   | 100   | 27.9% | 13 | 22.4%  | 0  | 0.0%   |
| ESR1    | rs11963577# | 149                                                                | 34.8% | 1     | 100.0% | 0                                                           | 0.0%   | 115   | 26.9% | 1  | 100.0% | 0  | 0.0%   |
| ESR1    | rs1709181   | 46                                                                 | 41.8% | 59    | 31.9%  | 24                                                          | 32.4%  | 36    | 32.7% | 40 | 21.6%  | 21 | 28.4%  |
| ESR1    | rs1709182   | 63                                                                 | 40.4% | 55    | 31.6%  | 18                                                          | 31.6%  | 49    | 31.4% | 39 | 22.4%  | 15 | 26.3%  |
| ESR1    | rs1884049   | 77                                                                 | 32.6% | 65    | 39.2%  | 5                                                           | 27.8%  | 57    | 24.2% | 51 | 30.7%  | 5  | 27.8%  |
| ESR1    | rs2077647   | 41                                                                 | 36.3% | 66    | 33.8%  | 40                                                          | 37.4%  | 31    | 27.4% | 51 | 26.2%  | 32 | 29.9%  |
| ESR1    | rs2228480   | 104                                                                | 39.1% | 40    | 30.1%  | 4                                                           | 23.5%  | 81    | 30.5% | 29 | 21.8%  | 4  | 23.5%  |
| ESR1    | rs2234693   | 37                                                                 | 35.9% | 65    | 33.7%  | 34                                                          | 34.7%  | 28    | 27.2% | 50 | 25.9%  | 27 | 27.6%  |
| ESR1    | rs2347868   | 81                                                                 | 32.4% | 56    | 37.8%  | 9                                                           | 52.9%  | 60    | 24.0% | 43 | 29.1%  | 9  | 52.9%  |
| ESR1    | rs2347869   | 47                                                                 | 32.6% | 71    | 35.0%  | 30                                                          | 40.0%  | 34    | 23.6% | 55 | 27.1%  | 24 | 32.0%  |
| ESR1    | rs2747648#  | 142                                                                | 36.0% | 5     | 20.8%  | 1                                                           | 50.0%  | 110   | 27.9% | 3  | 12.5%  | 0  | 0.0%   |
| ESR1    | rs2813543   | 91                                                                 | 36.0% | 50    | 34.2%  | 11                                                          | 34.4%  | 74    | 29.2% | 36 | 24.7%  | 7  | 21.9%  |
| ESR1    | rs2982734   | 59                                                                 | 35.5% | 68    | 35.1%  | 18                                                          | 31.0%  | 39    | 23.5% | 57 | 29.4%  | 15 | 25.9%  |
| ESR1    | rs3003917   | 76                                                                 | 33.3% | 60    | 41.1%  | 2                                                           | 16.7%  | 56    | 24.6% | 46 | 31.5%  | 2  | 16.7%  |
| ESR1    | rs3020368   | 120                                                                | 35.0% | 24    | 34.8%  | 1                                                           | 50.0%  | 88    | 25.7% | 21 | 30.4%  | 1  | 50.0%  |
| ESR1    | rs3020371   | 63                                                                 | 36.6% | 67    | 35.1%  | 18                                                          | 31.6%  | 43    | 25.0% | 56 | 29.3%  | 15 | 26.3%  |
| ESR1    | rs3020376*  | 85                                                                 | 37.3% | 36    | 34.3%  | 19                                                          | 35.8%  | 62    | 27.2% | 29 | 27.6%  | 16 | 30.2%  |
| ESR1    | rs3020377   | 53                                                                 | 32.1% | 75    | 37.9%  | 21                                                          | 36.2%  | 38    | 23.0% | 58 | 29.3%  | 19 | 32.8%  |
| ESR1    | rs3020410   | 107                                                                | 36.3% | 41    | 32.5%  | 4                                                           | 80.0%  | 85    | 28.8% | 29 | 23.0%  | 3  | 60.0%  |
| ESR1    | rs3778610*  | 123                                                                | 34.3% | 9     | 32.1%  | 4                                                           | 40.0%  | 91    | 25.3% | 7  | 25.0%  | 3  | 30.0%  |
| ESR1    | rs3798565*  | 94                                                                 | 35.5% | 37    | 35.6%  | 9                                                           | 22.0%  | 68    | 25.7% | 32 | 30.8%  | 8  | 19.5%  |
| ESR1    | rs3798577   | 40                                                                 | 31.5% | 78    | 37.5%  | 33                                                          | 36.7%  | 29    | 22.8% | 58 | 27.9%  | 29 | 32.2%  |
| ESR1    | rs3798758#  | 140                                                                | 35.2% | 9     | 37.5%  | 1                                                           | 100.0% | 107   | 26.9% | 7  | 29.2%  | 1  | 100.0% |
| ESR1    | rs3853250   | 40                                                                 | 37.0% | 71    | 35.1%  | 34                                                          | 32.1%  | 31    | 28.7% | 53 | 26.2%  | 27 | 25.5%  |
| ESR1    | rs4870056   | 37                                                                 | 36.6% | 71    | 36.2%  | 31                                                          | 32.6%  | 29    | 28.7% | 52 | 26.5%  | 25 | 26.3%  |
| ESR1    | rs4870061   | 83                                                                 | 32.0% | 55    | 39.9%  | 8                                                           | 38.1%  | 62    | 23.9% | 42 | 30.4%  | 8  | 38.1%  |
| ESR1    | rs4986934#  | 135                                                                | 34.5% | 13    | 41.9%  | 0                                                           | 0.0%   | 104   | 26.6% | 10 | 32.3%  | 0  | 0.0%   |
| ESR1    | rs6909026#  | 132                                                                | 33.5% | 8     | 44.4%  | 1                                                           | 100.0% | 99    | 25.1% | 7  | 38.9%  | 1  | 100.0% |
| ESR1    | rs6920483#  | 134                                                                | 33.9% | 7     | 38.9%  | 0                                                           | 0.0%   | 102   | 25.8% | 5  | 27.8%  | 0  | 0.0%   |
| ESR1    | rs6930355   | 109                                                                | 36.5% | 35    | 34.0%  | 3                                                           | 25.0%  | 79    | 26.4% | 31 | 30.1%  | 3  | 25.0%  |
| ESR1    | rs750686    | 61                                                                 | 37.2% | 66    | 34.6%  | 19                                                          | 33.9%  | 42    | 25.6% | 54 | 28.3%  | 16 | 28.6%  |
| ESR1    | rs867239#   | 142                                                                | 34.9% | 9     | 37.5%  | 0                                                           | 0.0%   | 109   | 26.8% | 7  | 29.2%  | 0  | 0.0%   |
| ESR1    | rs926848#   | 132                                                                | 34.9% | 11    | 35.5%  | 0                                                           | 0.0%   | 101   | 26.7% | 9  | 29.0%  | 0  | 0.0%   |
| ESR1    | rs9322331   | 67                                                                 | 34.7% | 63    | 34.2%  | 21                                                          | 39.6%  | 52    | 26.9% | 49 | 26.6%  | 16 | 30.2%  |
| ESR1    | rs9322335   | 75                                                                 | 33.5% | 63    | 35.2%  | 13                                                          | 54.2%  | 56    | 25.0% | 48 | 26.8%  | 12 | 50.0%  |
| ESR1    | rs9322336   | 82                                                                 | 34.0% | 48    | 35.0%  | 11                                                          | 61.1%  | 63    | 26.1% | 34 | 24.8%  | 10 | 55.6%  |
| ESR1    | rs9322338*  | 131                                                                | 36.0% | 8     | 26.7%  | 5                                                           | 45.5%  | 100   | 27.5% | 5  | 16.7%  | 5  | 45.5%  |
| ESR1    | rs9322348#  | 148                                                                | 34.7% | 0     | 0.0%   | 4                                                           | 66.7%  | 114   | 26.8% | 0  | 0.0%   | 3  | 50.0%  |
| ESR1    | rs9340799   | 52                                                                 | 33.3% | 59    | 32.8%  | 24                                                          | 43.6%  | 39    | 25.0% | 44 | 24.4%  | 19 | 34.5%  |
| ESR1    | rs9340817#  | 135                                                                | 36.2% | 5     | 27.8%  | 1                                                           | 25.0%  | 103   | 27.6% | 5  | 27.8%  | 0  | 0.0%   |
| ESR1    | rs9340835   | 67                                                                 | 42.1% | 58    | 30.7%  | 12                                                          | 27.9%  | 55    | 34.6% | 39 | 20.6%  | 11 | 25.6%  |
| ESR1    | rs9340941*# | 126                                                                | 35.4% | 0     | 0.0%   | 13                                                          | 34.2%  | 99    | 27.8% | 0  | 0.0%   | 9  | 23.7%  |
| ESR1    | rs9340958   | 126                                                                | 36.0% | 17    | 31.5%  | 1                                                           | 50.0%  | 96    | 27.4% | 14 | 25.9%  | 1  | 50.0%  |
| ESR1    | rs9341004   | 110                                                                | 34.0% | 34    | 43.0%  | 1                                                           | 20.0%  | 80    | 24.7% | 30 | 38.0%  | 1  | 20.0%  |
| ESR1    | rs9341066   | 118                                                                | 34.6% | 19    | 35.2%  | 1                                                           | 100.0% | 88    | 25.8% | 15 | 27.8%  | 1  | 100.0% |
| ESR1    | rs9341070#  | 148                                                                | 35.0% | 1     | 25.0%  | 1                                                           | 100.0% | 114   | 27.0% | 1  | 25.0%  | 0  | 0.0%   |
| ESR1    | rs9341072#  | 137                                                                | 33.9% | 0     | 0.0%   | 1                                                           | 100.0% | 104   | 25.7% | 0  | 0.0%   | 0  | 0.0%   |
| ESR1    | rs9341077#  | 143                                                                | 36.5% | 6     | 17.1%  | 0                                                           | 0.0%   | 111   | 28.3% | 4  | 11.4%  | 0  | 0.0%   |
| ESR1    | rs9479188   | 103                                                                | 34.7% | 41    | 36.6%  | 5                                                           | 29.4%  | 74    | 24.9% | 36 | 32.1%  | 4  | 23.5%  |

|        |             |     |       |    |       |    |        |     |       |    |       |    |        |
|--------|-------------|-----|-------|----|-------|----|--------|-----|-------|----|-------|----|--------|
| ESR2   | rs10140457# | 144 | 35.6% | 5  | 22.7% | 1  | 100.0% | 110 | 27.2% | 4  | 18.2% | 1  | 100.0% |
| ESR2   | rs1256031   | 44  | 34.9% | 65 | 34.2% | 30 | 36.1%  | 33  | 26.2% | 46 | 24.2% | 26 | 31.3%  |
| ESR2   | rs1256049#  | 139 | 35.8% | 10 | 31.3% | 0  | 0.0%   | 105 | 27.1% | 9  | 28.1% | 0  | 0.0%   |
| ESR2   | rs1256059   | 48  | 33.8% | 68 | 36.2% | 28 | 37.3%  | 36  | 25.4% | 51 | 27.1% | 23 | 30.7%  |
| ESR2   | rs1256062   | 115 | 36.7% | 30 | 29.1% | 5  | 41.7%  | 89  | 28.4% | 22 | 21.4% | 4  | 33.3%  |
| ESR2   | rs1256064*  | 113 | 36.1% | 26 | 29.9% | 8  | 36.4%  | 87  | 27.8% | 19 | 21.8% | 7  | 31.8%  |
| ESR2   | rs17766755  | 61  | 34.5% | 63 | 34.8% | 17 | 35.4%  | 51  | 28.8% | 44 | 24.3% | 13 | 27.1%  |
| ESR2   | rs1952585*  | 113 | 34.9% | 27 | 35.5% | 6  | 42.9%  | 87  | 26.9% | 20 | 26.3% | 5  | 35.7%  |
| ESR2   | rs2274705   | 99  | 35.1% | 27 | 39.1% | 4  | 50.0%  | 76  | 27.0% | 20 | 29.0% | 3  | 37.5%  |
| ESR2   | rs3020450   | 67  | 34.9% | 68 | 35.1% | 14 | 35.9%  | 55  | 28.6% | 51 | 26.3% | 9  | 23.1%  |
| ESR2   | rs4986938   | 62  | 34.3% | 68 | 37.0% | 19 | 32.2%  | 52  | 28.7% | 48 | 26.1% | 15 | 25.4%  |
| ESR2   | rs8003490   | 119 | 34.8% | 23 | 36.5% | 0  | 0.0%   | 93  | 27.2% | 15 | 23.8% | 0  | 0.0%   |
| ESR2   | rs8006145   | 79  | 33.9% | 60 | 36.6% | 10 | 31.3%  | 63  | 27.0% | 44 | 26.8% | 8  | 25.0%  |
| ESR2   | rs867443    | 81  | 33.9% | 58 | 37.2% | 9  | 31.0%  | 65  | 27.2% | 43 | 27.6% | 7  | 24.1%  |
| ESR2   | rs944045    | 118 | 34.5% | 22 | 36.7% | 4  | 44.4%  | 92  | 26.9% | 16 | 26.7% | 3  | 33.3%  |
| ESR2   | rs944460#   | 129 | 36.0% | 7  | 22.6% | 0  | 0.0%   | 97  | 27.1% | 6  | 19.4% | 0  | 0.0%   |
| EZH2   | rs2302427   | 127 | 34.8% | 21 | 36.2% | 0  | 0.0%   | 98  | 26.8% | 16 | 27.6% | 0  | 0.0%   |
| HCRT   | rs41513044# | 147 | 35.7% | 3  | 30.0% | 0  | 0.0%   | 113 | 27.4% | 3  | 30.0% | 0  | 0.0%   |
| HCRT   | rs9902709   | 99  | 34.5% | 42 | 36.2% | 4  | 40.0%  | 73  | 25.4% | 33 | 28.4% | 4  | 40.0%  |
| HCRTR1 | rs11806980  | 138 | 36.0% | 12 | 30.8% | 0  | 0.0%   | 103 | 26.9% | 12 | 30.8% | 0  | 0.0%   |
| HCRTR1 | rs2176807   | 47  | 37.6% | 68 | 32.9% | 34 | 37.0%  | 33  | 26.4% | 54 | 26.1% | 27 | 29.3%  |
| HCRTR1 | rs2271933   | 56  | 36.1% | 67 | 33.8% | 24 | 36.4%  | 40  | 25.8% | 52 | 26.3% | 20 | 30.3%  |
| HCRTR2 | rs2653349   | 102 | 35.7% | 42 | 34.4% | 5  | 35.7%  | 79  | 27.6% | 31 | 25.4% | 4  | 28.6%  |
| HTR1A  | rs1800046#  | 151 | 35.4% | 0  | 0.0%  | 0  | 0.0%   | 116 | 27.2% | 0  | 0.0%  | 0  | 0.0%   |
| HTR1A  | rs6295      | 34  | 30.9% | 79 | 36.6% | 31 | 35.6%  | 25  | 22.7% | 67 | 31.0% | 19 | 21.8%  |
| HTR2A  | rs1328685   | 115 | 34.4% | 31 | 38.8% | 0  | 0.0%   | 93  | 27.8% | 19 | 23.8% | 0  | 0.0%   |
| HTR2A  | rs1805055*# | 136 | 38.4% | 2  | 7.7%  | 12 | 27.9%  | 106 | 29.9% | 1  | 3.8%  | 9  | 20.9%  |
| HTR2A  | rs2274639   | 112 | 35.2% | 33 | 34.4% | 3  | 33.3%  | 83  | 26.1% | 27 | 28.1% | 3  | 33.3%  |
| HTR2A  | rs2296972   | 74  | 40.7% | 66 | 37.7% | 10 | 15.6%  | 55  | 30.2% | 52 | 29.7% | 8  | 12.5%  |
| HTR2A  | rs3742278   | 114 | 35.2% | 30 | 35.7% | 5  | 33.3%  | 90  | 27.8% | 19 | 22.6% | 5  | 33.3%  |
| HTR2A  | rs594242    | 104 | 37.0% | 38 | 31.1% | 6  | 35.3%  | 82  | 29.2% | 27 | 22.1% | 5  | 29.4%  |
| HTR2A  | rs6306      | 125 | 34.9% | 21 | 38.2% | 0  | 0.0%   | 95  | 26.5% | 17 | 30.9% | 0  | 0.0%   |
| HTR2A  | rs6308#     | 147 | 35.3% | 1  | 33.3% | 0  | 0.0%   | 112 | 26.9% | 1  | 33.3% | 0  | 0.0%   |
| HTR2A  | rs6311      | 49  | 37.1% | 73 | 35.3% | 26 | 34.2%  | 35  | 26.5% | 59 | 28.5% | 20 | 26.3%  |
| HTR2A  | rs6313      | 46  | 35.7% | 76 | 35.2% | 26 | 35.1%  | 33  | 25.6% | 61 | 28.2% | 20 | 27.0%  |
| HTR2A  | rs731779    | 96  | 34.0% | 45 | 35.2% | 6  | 75.0%  | 69  | 24.5% | 38 | 29.7% | 5  | 62.5%  |
| HTR2A  | rs7997012   | 72  | 43.1% | 55 | 29.3% | 21 | 33.9%  | 57  | 34.1% | 42 | 22.3% | 15 | 24.2%  |
| HTR2A  | rs9567746   | 97  | 34.0% | 45 | 35.4% | 6  | 75.0%  | 71  | 24.9% | 38 | 29.9% | 5  | 62.5%  |
| NCOA1  | rs11125744  | 114 | 36.5% | 27 | 30.7% | 2  | 16.7%  | 83  | 26.6% | 25 | 28.4% | 2  | 16.7%  |
| NCOA1  | rs17737058  | 81  | 33.9% | 49 | 32.5% | 13 | 59.1%  | 68  | 28.5% | 32 | 21.2% | 10 | 45.5%  |
| NCOA1  | rs1804645#  | 137 | 35.2% | 12 | 33.3% | 0  | 0.0%   | 104 | 26.7% | 10 | 27.8% | 0  | 0.0%   |
| NCOA1  | rs2033861   | 36  | 32.7% | 59 | 35.5% | 28 | 31.5%  | 31  | 28.2% | 41 | 24.7% | 20 | 22.5%  |
| NCOA1  | rs2083389   | 69  | 32.4% | 51 | 33.3% | 13 | 54.2%  | 57  | 26.8% | 35 | 22.9% | 9  | 37.5%  |
| NCOA1  | rs3731628   | 129 | 34.8% | 21 | 37.5% | 0  | 0.0%   | 98  | 26.4% | 17 | 30.4% | 0  | 0.0%   |
| NCOA1  | rs920418    | 49  | 37.4% | 71 | 36.4% | 27 | 29.0%  | 38  | 29.0% | 51 | 26.2% | 24 | 25.8%  |
| NCOA2  | rs1380896   | 83  | 34.0% | 34 | 31.8% | 9  | 40.9%  | 59  | 24.2% | 27 | 25.2% | 8  | 36.4%  |
| NCOA2  | rs2228591#  | 134 | 34.8% | 14 | 36.8% | 0  | 0.0%   | 99  | 25.7% | 14 | 36.8% | 0  | 0.0%   |
| NCOA2  | rs2272670   | 80  | 34.8% | 46 | 31.9% | 14 | 46.7%  | 59  | 25.7% | 37 | 25.7% | 12 | 40.0%  |
| NCOA2  | rs3088092   | 125 | 34.5% | 14 | 34.1% | 1  | 50.0%  | 96  | 26.5% | 11 | 26.8% | 1  | 50.0%  |
| NCOA2  | rs4738079   | 114 | 35.2% | 21 | 31.3% | 0  | 0.0%   | 86  | 26.5% | 15 | 22.4% | 0  | 0.0%   |
| NCOA3  | rs2076546   | 124 | 36.7% | 25 | 31.3% | 0  | 0.0%   | 94  | 27.8% | 20 | 25.0% | 0  | 0.0%   |
| NCOA3  | rs2230782   | 124 | 34.8% | 17 | 30.4% | 2  | 100.0% | 95  | 26.7% | 14 | 25.0% | 2  | 100.0% |
| NCOA3  | rs365602    | 98  | 34.4% | 19 | 27.5% | 2  | 25.0%  | 78  | 27.4% | 14 | 20.3% | 1  | 12.5%  |
| NCOA3  | rs396221    | 42  | 36.2% | 72 | 32.3% | 29 | 39.2%  | 31  | 26.7% | 54 | 24.2% | 23 | 31.1%  |
| NCOA3  | rs6094752   | 131 | 35.5% | 14 | 30.4% | 1  | 50.0%  | 100 | 27.1% | 11 | 23.9% | 1  | 50.0%  |
| NCOR1  | rs1065822   | 44  | 34.9% | 76 | 39.0% | 27 | 26.2%  | 34  | 27.0% | 59 | 30.3% | 20 | 19.4%  |
| NCOR1  | rs1073093#  | 139 | 35.5% | 8  | 28.6% | 0  | 0.0%   | 109 | 27.8% | 5  | 17.9% | 0  | 0.0%   |
| NCOR1  | rs61753150# | 139 | 35.5% | 2  | 14.3% | 0  | 0.0%   | 106 | 27.0% | 1  | 7.1%  | 0  | 0.0%   |
| NCOR2  | rs1812730   | 48  | 37.5% | 73 | 34.0% | 25 | 32.5%  | 34  | 26.6% | 60 | 27.9% | 19 | 24.7%  |
| NCOR2  | rs2229840   | 103 | 35.0% | 40 | 33.3% | 5  | 62.5%  | 81  | 27.6% | 30 | 25.0% | 3  | 37.5%  |
| NCOR2  | rs7978237   | 104 | 33.5% | 32 | 38.1% | 5  | 41.7%  | 80  | 25.8% | 24 | 28.6% | 3  | 25.0%  |
| NCOR2  | rs837935    | 59  | 32.8% | 59 | 34.3% | 18 | 33.3%  | 49  | 27.2% | 43 | 25.0% | 14 | 25.9%  |
| NRIP1  | rs2229742   | 118 | 35.1% | 27 | 34.6% | 1  | 16.7%  | 89  | 26.5% | 21 | 26.9% | 1  | 16.7%  |
| PELP1  | rs9436      | 101 | 37.0% | 36 | 29.0% | 12 | 41.4%  | 77  | 28.2% | 29 | 23.4% | 8  | 27.6%  |
| PGR    | rs1042838   | 108 | 34.2% | 39 | 39.8% | 2  | 20.0%  | 83  | 26.3% | 30 | 30.6% | 2  | 20.0%  |
| PGR    | rs11571171  | 67  | 34.5% | 62 | 33.5% | 17 | 47.2%  | 53  | 27.3% | 48 | 25.9% | 13 | 36.1%  |
| PGR    | rs500760    | 77  | 33.8% | 55 | 37.9% | 10 | 32.3%  | 59  | 25.9% | 40 | 27.6% | 9  | 29.0%  |
| PGR    | rs506487    | 72  | 37.1% | 58 | 32.6% | 16 | 31.4%  | 59  | 30.4% | 42 | 23.6% | 11 | 21.6%  |
| PGR    | rs516693    | 110 | 35.9% | 33 | 30.8% | 3  | 60.0%  | 83  | 27.1% | 26 | 24.3% | 3  | 60.0%  |
| PGR    | rs518162    | 109 | 34.1% | 29 | 42.0% | 1  | 16.7%  | 78  | 24.4% | 26 | 37.7% | 1  | 16.7%  |
| PGR    | rs660149    | 63  | 29.9% | 70 | 39.5% | 12 | 40.0%  | 49  | 23.2% | 52 | 29.4% | 10 | 33.3%  |
| PGR    | rs7116336   | 121 | 35.9% | 19 | 31.1% | 1  | 14.3%  | 92  | 27.3% | 14 | 23.0% | 1  | 14.3%  |
| SLC6A4 | rs140700    | 125 | 34.8% | 24 | 36.9% | 1  | 50.0%  | 96  | 26.7% | 18 | 27.7% | 1  | 50.0%  |
| SLC6A4 | rs16965628  | 125 | 35.7% | 22 | 31.4% | 0  | 0.0%   | 96  | 27.4% | 16 | 22.9% | 0  | 0.0%   |
| SLC6A4 | rs25531#    | 137 | 34.8% | 7  | 33.3% | 0  | 0.0%   | 104 | 26.4% | 7  | 33.3% | 0  | 0.0%   |
| SLC6A4 | rs25532     | 98  | 35.8% | 22 | 25.3% | 5  | 71.4%  | 75  | 27.4% | 17 | 19.5% | 5  | 71.4%  |
| TCL1A  | rs11849538  | 122 | 38.6% | 29 | 27.4% | 0  | 0.0%   | 92  | 29.1% | 24 | 22.6% | 0  | 0.0%   |
| TCL1A  | rs2369049   | 116 | 39.5% | 34 | 29.3% | 2  | 9.5%   | 87  | 29.6% | 28 | 24.1% | 2  | 9.5%   |
| TCL1A  | rs7158782   | 110 | 38.7% | 39 | 31.2% | 3  | 13.6%  | 81  | 28.5% | 33 | 26.4% | 3  | 13.6%  |
| TCL1A  | rs7159713   | 110 | 38.1% | 40 | 33.1% | 2  | 9.5%   | 81  | 28.0% | 34 | 28.1% | 2  | 9.5%   |

\* not in Hardy-Weinberg equilibrium

# excluded from analysis (plus 8 additional SNPs not listed because MAF 0)

| Gene    | SNP        | # repeats    | Discontinued due to any toxicity<br>(No, % of total with # repeats) |     |       |     | Discontinued due to AIMSS<br>(No, % of total with # repeats) |     |       |    |  |  |
|---------|------------|--------------|---------------------------------------------------------------------|-----|-------|-----|--------------------------------------------------------------|-----|-------|----|--|--|
|         |            |              | None                                                                |     | Any   |     | None                                                         |     | Any   |    |  |  |
|         |            |              | %                                                                   | No  | %     | No  | %                                                            | No  | %     | No |  |  |
| CYP19A1 | rs60271534 | TTTA repeats |                                                                     |     |       |     |                                                              |     |       |    |  |  |
|         |            | 7            | 38.8%                                                               | 33  | 34.2% | 117 | 27.1%                                                        | 23  | 26.9% | 92 |  |  |
|         |            | 8            | 34.5%                                                               | 120 | 38.0% | 30  | 25.9%                                                        | 90  | 31.6% | 25 |  |  |
|         |            | 10           | 35.3%                                                               | 148 | 25.0% | 2   | 27.0%                                                        | 113 | 25.0% | 2  |  |  |
|         |            | 11           | 35.6%                                                               | 74  | 34.7% | 76  | 26.9%                                                        | 56  | 26.9% | 59 |  |  |
| 12      | 34.4%      | 138          | 46.2%                                                               | 12  | 27.2% | 109 | 23.1%                                                        | 6   |       |    |  |  |
