# Supplementary material
Source: PubMed Central journal article supplement (PMC3646626)
Supplement: NIHMS462885-supplement-10549_2013_2504_MOESM4_ESM.pdf [file NIHMS462885-supplement-10549_2013_2504_MOESM4_ESM.pdf]

**Supplementary Table 3.** Associations between individual candidate gene variants and treatment discontinuation because of side effects, analyzed using additive, dominant, and recessive statistical models. AIMSS: Aromatase inhibitor associated musculoskeletal syndrome; CI: confidence interval; SNPSFX: single nucleotide polymorphism.

Additive Model (Gene Dose)

|         |            | Both Drugs Combined: Side Effects |              |          |          | Both Drugs Combined: Side Effects Due to AIMSS |              |          |          | Letrozole Only Side Effects |              |          |          | Letrozole Only Side Effects Due to AIMSS |              |          |          | Exemestane Only Side Effects |              |          |          | Exemestane Only Side Effects Due to AIMSS |              |          |          |
|---------|------------|-----------------------------------|--------------|----------|----------|------------------------------------------------|--------------|----------|----------|-----------------------------|--------------|----------|----------|------------------------------------------|--------------|----------|----------|------------------------------|--------------|----------|----------|-------------------------------------------|--------------|----------|----------|
| GENE    | SNPSFX     | P-value                           | Hazard Ratio | Lower CI | Upper CI | P-value                                        | Hazard Ratio | Lower CI | Upper CI | P-value                     | Hazard Ratio | Lower CI | Upper CI | P-value                                  | Hazard Ratio | Lower CI | Upper CI | P-value                      | Hazard Ratio | Lower CI | Upper CI | P-value                                   | Hazard Ratio | Lower CI | Upper CI |
| ARVCF   | rs165815   | 0.1576                            | 0.80         | 0.59     | 1.09     | 0.1853                                         | 0.79         | 0.56     | 1.12     | 0.2838                      | 0.77         | 0.47     | 1.25     | 0.3964                                   | 0.79         | 0.46     | 1.36     | 0.2912                       | 0.81         | 0.55     | 1.20     | 0.2676                                    | 0.77         | 0.49     | 1.22     |
| COMT    | rs165599   | 0.0612                            | 0.79         | 0.62     | 1.01     | 0.0920                                         | 0.79         | 0.60     | 1.04     | 0.3010                      | 0.82         | 0.56     | 1.19     | 0.3592                                   | 0.82         | 0.53     | 1.25     | 0.0935                       | 0.76         | 0.55     | 1.05     | 0.1281                                    | 0.75         | 0.52     | 1.09     |
| COMT    | rs165774   | 0.0463                            | 1.26         | 1.00     | 1.59     | 0.1328                                         | 1.22         | 0.94     | 1.59     | 0.2289                      | 1.24         | 0.87     | 1.76     | 0.2412                                   | 1.27         | 0.85     | 1.89     | 0.1469                       | 1.25         | 0.92     | 1.70     | 0.3917                                    | 1.17         | 0.82     | 1.66     |
| COMT    | rs2097903  | 0.2778                            | 0.88         | 0.70     | 1.11     | 0.2604                                         | 0.86         | 0.66     | 1.12     | 0.0812                      | 0.74         | 0.53     | 1.04     | 0.0282                                   | 0.65         | 0.44     | 0.95     | 0.8489                       | 1.03         | 0.75     | 1.41     | 0.5658                                    | 1.11         | 0.78     | 1.59     |
| COMT    | rs4633     | 0.0700                            | 1.23         | 0.98     | 1.54     | 0.1685                                         | 1.20         | 0.93     | 1.55     | 0.3911                      | 1.15         | 0.83     | 1.60     | 0.5087                                   | 1.13         | 0.78     | 1.64     | 0.1224                       | 1.28         | 0.94     | 1.75     | 0.2466                                    | 1.24         | 0.86     | 1.77     |
| COMT    | rs4646310  | 0.2730                            | 0.84         | 0.62     | 1.15     | 0.1023                                         | 0.73         | 0.50     | 1.06     | 0.9015                      | 1.03         | 0.67     | 1.58     | 0.8686                                   | 0.96         | 0.58     | 1.57     | 0.1079                       | 0.69         | 0.44     | 1.08     | 0.0398                                    | 0.55         | 0.31     | 0.97     |
| COMT    | rs4680     | 0.3042                            | 1.13         | 0.90     | 1.42     | 0.4558                                         | 1.10         | 0.85     | 1.44     | 0.7368                      | 1.06         | 0.76     | 1.48     | 0.8135                                   | 1.05         | 0.71     | 1.53     | 0.3609                       | 1.16         | 0.84     | 1.60     | 0.5222                                    | 1.13         | 0.78     | 1.63     |
| COMT    | rs4818     | 0.7436                            | 0.96         | 0.75     | 1.23     | 0.5898                                         | 0.92         | 0.69     | 1.23     | 0.7475                      | 1.06         | 0.75     | 1.49     | 0.8350                                   | 0.96         | 0.65     | 1.42     | 0.4392                       | 0.87         | 0.60     | 1.25     | 0.5823                                    | 0.89         | 0.58     | 1.36     |
| COMT    | rs6269     | 0.4669                            | 0.92         | 0.73     | 1.15     | 0.3490                                         | 0.88         | 0.68     | 1.14     | 0.9692                      | 1.01         | 0.73     | 1.39     | 0.6770                                   | 0.92         | 0.64     | 1.34     | 0.3324                       | 0.85         | 0.62     | 1.18     | 0.4005                                    | 0.85         | 0.59     | 1.23     |
| COMT    | rs933271   | 0.0204                            | 0.74         | 0.57     | 0.95     | 0.0599                                         | 0.76         | 0.57     | 1.01     | 0.2517                      | 0.80         | 0.55     | 1.17     | 0.5831                                   | 0.89         | 0.59     | 1.35     | 0.0379                       | 0.69         | 0.49     | 0.98     | 0.0432                                    | 0.66         | 0.44     | 0.99     |
| CYP19A1 | rs10046    | 0.6682                            | 1.05         | 0.83     | 1.33     | 0.7291                                         | 1.05         | 0.80     | 1.37     | 0.8851                      | 0.97         | 0.69     | 1.38     | 0.9509                                   | 1.01         | 0.68     | 1.51     | 0.5011                       | 1.11         | 0.81     | 1.53     | 0.7023                                    | 1.07         | 0.75     | 1.54     |
| CYP19A1 | rs1008805  | 0.1835                            | 0.84         | 0.66     | 1.08     | 0.0927                                         | 0.78         | 0.59     | 1.04     | 0.2713                      | 0.81         | 0.55     | 1.18     | 0.0726                                   | 0.66         | 0.43     | 1.04     | 0.4951                       | 0.89         | 0.65     | 1.24     | 0.5701                                    | 0.90         | 0.62     | 1.30     |
| CYP19A1 | rs10459592 | 0.5170                            | 0.93         | 0.75     | 1.16     | 0.9656                                         | 0.99         | 0.77     | 1.28     | 0.7934                      | 0.96         | 0.69     | 1.32     | 0.8511                                   | 1.04         | 0.72     | 1.49     | 0.6654                       | 0.93         | 0.69     | 1.27     | 0.9570                                    | 0.99         | 0.70     | 1.40     |
| CYP19A1 | rs1062033  | 0.3035                            | 1.13         | 0.89     | 1.43     | 0.5497                                         | 1.09         | 0.83     | 1.42     | 0.6214                      | 1.10         | 0.76     | 1.57     | 0.6965                                   | 1.09         | 0.72     | 1.64     | 0.4872                       | 1.12         | 0.82     | 1.52     | 0.8065                                    | 1.05         | 0.73     | 1.49     |
| CYP19A1 | rs2008691  | 0.8337                            | 0.97         | 0.72     | 1.30     | 0.6045                                         | 1.09         | 0.79     | 1.50     | 0.5555                      | 0.88         | 0.56     | 1.36     | 0.8757                                   | 1.04         | 0.64     | 1.68     | 0.6364                       | 1.10         | 0.75     | 1.61     | 0.4491                                    | 1.18         | 0.77     | 1.82     |
| CYP19A1 | rs2289105  | 0.8512                            | 1.02         | 0.81     | 1.29     | 0.9209                                         | 1.01         | 0.78     | 1.32     | 0.8973                      | 0.98         | 0.69     | 1.39     | 0.9409                                   | 1.02         | 0.68     | 1.52     | 0.7627                       | 1.05         | 0.77     | 1.43     | 0.9930                                    | 1.00         | 0.70     | 1.43     |
| CYP19A1 | rs2414096  | 0.6370                            | 1.06         | 0.82     | 1.37     | 0.8094                                         | 1.04         | 0.77     | 1.40     | 0.9533                      | 0.99         | 0.68     | 1.44     | 0.9628                                   | 0.99         | 0.64     | 1.53     | 0.5197                       | 1.12         | 0.79     | 1.60     | 0.7377                                    | 1.07         | 0.71     | 1.63     |
| CYP19A1 | rs28566535 | 0.4700                            | 1.13         | 0.81     | 1.60     | 0.0604                                         | 1.41         | 0.99     | 2.00     | 0.6767                      | 1.11         | 0.67     | 1.85     | 0.1432                                   | 1.47         | 0.88     | 2.45     | 0.4133                       | 1.21         | 0.76     | 1.92     | 0.1594                                    | 1.42         | 0.87     | 2.33     |
| CYP19A1 | rs28757184 | 0.2358                            | 0.58         | 0.24     | 1.42     | 0.5688                                         | 0.77         | 0.31     | 1.89     | 0.2319                      | 0.42         | 0.10     | 1.73     | 0.4084                                   | 0.55         | 0.13     | 2.27     | 0.7281                       | 0.82         | 0.26     | 2.58     | 0.8755                                    | 1.10         | 0.34     | 3.50     |
| CYP19A1 | rs3759811  | 0.5696                            | 1.08         | 0.84     | 1.39     | 0.8241                                         | 1.03         | 0.77     | 1.38     | 0.7730                      | 1.06         | 0.73     | 1.53     | 0.7752                                   | 1.06         | 0.70     | 1.61     | 0.6878                       | 1.07         | 0.76     | 1.53     | 0.9729                                    | 0.99         | 0.66     | 1.50     |
| CYP19A1 | rs4646     | 0.0568                            | 0.77         | 0.59     | 1.01     | 0.0262                                         | 0.70         | 0.51     | 0.96     | 0.0264                      | 0.62         | 0.41     | 0.95     | 0.0195                                   | 0.55         | 0.34     | 0.91     | 0.5461                       | 0.90         | 0.63     | 1.28     | 0.3703                                    | 0.83         | 0.54     | 1.25     |
| CYP19A1 | rs4774585  | 0.1040                            | 1.25         | 0.95     | 1.65     | 0.3414                                         | 1.17         | 0.85     | 1.61     | 0.5150                      | 1.14         | 0.76     | 1.71     | 0.4763                                   | 1.18         | 0.75     | 1.86     | 0.0790                       | 1.40         | 0.96     | 2.04     | 0.4682                                    | 1.18         | 0.75     | 1.87     |
| CYP19A1 | rs4775936  | 0.3142                            | 1.13         | 0.89     | 1.42     | 0.6265                                         | 1.07         | 0.82     | 1.40     | 0.3695                      | 1.18         | 0.82     | 1.68     | 0.4453                                   | 1.17         | 0.78     | 1.75     | 0.7256                       | 1.06         | 0.77     | 1.44     | 0.8429                                    | 0.96         | 0.67     | 1.38     |
| CYP19A1 | rs6493497  | 0.1983                            | 0.77         | 0.52     | 1.14     | 0.5463                                         | 0.87         | 0.56     | 1.35     | 0.1089                      | 0.60         | 0.32     | 1.12     | 0.2622                                   | 0.67         | 0.34     | 1.34     | 0.8749                       | 0.96         | 0.58     | 1.59     | 0.7511                                    | 1.09         | 0.63     | 1.92     |
| CYP19A1 | rs700518   | 0.6082                            | 1.06         | 0.84     | 1.35     | 0.8385                                         | 1.03         | 0.78     | 1.35     | 0.7090                      | 1.07         | 0.75     | 1.53     | 0.6938                                   | 1.08         | 0.72     | 1.63     | 0.8532                       | 1.03         | 0.75     | 1.42     | 0.8203                                    | 0.96         | 0.66     | 1.39     |
| CYP19A1 | rs7181886  | 0.6318                            | 1.10         | 0.75     | 1.60     | 0.2235                                         | 1.28         | 0.86     | 1.92     | 0.9122                      | 1.03         | 0.59     | 1.81     | 0.2824                                   | 1.36         | 0.77     | 2.40     | 0.3958                       | 1.25         | 0.75     | 2.07     | 0.3634                                    | 1.30         | 0.74     | 2.31     |
| CYP19A1 | rs727479   | 0.6221                            | 0.94         | 0.75     | 1.19     | 0.5697                                         | 0.93         | 0.71     | 1.21     | 0.8512                      | 0.97         | 0.70     | 1.35     | 0.7607                                   | 0.94         | 0.65     | 1.38     | 0.6519                       | 0.93         | 0.67     | 1.29     | 0.6496                                    | 0.92         | 0.63     | 1.34     |
| CYP19A1 | rs730154   | 0.7233                            | 0.95         | 0.70     | 1.29     | 0.4747                                         | 1.13         | 0.81     | 1.57     | 0.6254                      | 0.89         | 0.57     | 1.40     | 0.8386                                   | 1.05         | 0.64     | 1.72     | 0.9049                       | 1.03         | 0.68     | 1.56     | 0.3496                                    | 1.24         | 0.79     | 1.92     |
| CYP19A1 | rs749292   | 0.3419                            | 1.12         | 0.88     | 1.42     | 0.3573                                         | 1.14         | 0.87     | 1.49     | 0.2602                      | 1.23         | 0.86     | 1.74     | 0.2892                                   | 1.24         | 0.83     | 1.85     | 0.9397                       | 1.01         | 0.73     | 1.40     | 0.9051                                    | 1.02         | 0.71     | 1.48     |
| CYP19A1 | rs752760   | 0.4788                            | 1.09         | 0.86     | 1.37     | 0.4713                                         | 1.10         | 0.84     | 1.44     | 0.8079                      | 1.05         | 0.73     | 1.49     | 0.3866                                   | 1.20         | 0.80     | 1.80     | 0.3676                       | 1.15         | 0.85     | 1.56     | 0.7245                                    | 1.07         | 0.75     | 1.52     |
| CYP19A1 | rs936308   | 0.7443                            | 0.95         | 0.72     | 1.27     | 0.6424                                         | 1.08         | 0.79     | 1.47     | 0.5214                      | 0.87         | 0.57     | 1.33     | 0.8645                                   | 1.04         | 0.65     | 1.66     | 0.6833                       | 1.08         | 0.74     | 1.57     | 0.4774                                    | 1.16         | 0.77     | 1.77     |
| CYP19A1 | rs1157589# | 0.9946                            | 1.00         | 0.80     | 1.26     | 0.8684                                         | 0.98         | 0.75     | 1.27     | 0.5712                      | 1.10         | 0.79     | 1.52     | 0.7508                                   | 1.06         | 0.73     | 1.54     | 0.6199                       | 0.92         | 0.66     | 1.28     | 0.6089                                    | 0.91         | 0.62     | 1.32     |
| EP300   | rs20551    | 0.4773                            | 0.91         | 0.70     | 1.18     | 0.8049                                         | 0.96         | 0.72     | 1.29     | 0.1746                      | 0.75         | 0.49     | 1.14     | 0.3633                                   | 0.80         | 0.50     | 1.29     | 0.8750                       | 1.03         | 0.74     | 1.43     | 0.7075                                    | 1.07         | 0.74     | 1.56     |
| ESR1    | rs1062577  | 0.1557                            | 0.70         | 0.43     | 1.14     | 0.1959                                         | 0.69         | 0.40     | 1.21     | 0.4026                      | 0.74         | 0.36     | 1.51     | 0.4127                                   | 0.71         | 0.31     | 1.62     | 0.2528                       | 0.68         | 0.35     | 1.32     | 0.3201                                    | 0.68         | 0.32     | 1.44     |
| ESR1    | rs11963577 | 0.3647                            | 2.48         | 0.35     | 17.76    | 0.2568                                         | 3.12         | 0.44     | 22.39    | 0.2947                      | 2.88         | 0.40     | 20.76    | 0.2037                                   | 3.61         | 0.50     | 26.19    | NA                           | 1.00         | 1.00     | 1.00     | NA                                        | 1.00         | 1.00     | 1.00     |
| ESR1    | rs1709181  | 0.1068                            | 0.81         | 0.63     | 1.05     | 0.2361                                         | 0.84         | 0.62     | 1.12     | 0.2217                      | 0.79         | 0.54     | 1.15     | 0.1448                                   | 0.72         | 0.47     | 1.12     | 0.3077                       | 0.84         | 0.59     | 1.18     | 0.8145                                    | 0.95         | 0.64     | 1.42     |
| ESR1    | rs1709182  | 0.0961                            | 0.81         | 0.63     | 1.04     | 0.1456                                         | 0.81         | 0.60     | 1.08     | 0.0404                      | 0.67         | 0.45     | 0.98     | 0.0133                                   | 0.56         | 0.36     | 0.89     | 0.7292                       | 0.94         | 0.68     | 1.31     | 0.7348                                    | 1.07         | 0.73     | 1.55     |
| ESR1    | rs1884049  | 0.5215                            | 1.09         | 0.83     | 1.43     | 0.2658                                         | 1.19         | 0.88     | 1.61     | 0.1253                      | 1.38         | 0.91     | 2.09     | 0.0766                                   | 1.52         | 0.96     | 2.41     | 0.8036                       | 0.96         | 0.67     | 1.37     | 0.9083                                    | 1.02         | 0.68     | 1.54     |
| ESR1    | rs2077647  | 0.8788                            | 1.02         | 0.81     | 1.27     | 0.7163                                         | 1.05         | 0.81     | 1.35     | 0.8968                      | 1.02         | 0.73     | 1.44     | 0.6132                                   | 1.11         | 0.75     | 1.63     | 0.9399                       | 1.01         | 0.75     | 1.36     | 0.9735                                    | 1.01         | 0.72     | 1.41     |
| ESR1    | rs2228480  | 0.0369                            | 0.72         | 0.53     | 0.98     | 0.0645                                         | 0.72         | 0.50     | 1.02     | 0.0239                      | 0.58         | 0.36     | 0.93     | 0.0177                                   | 0.50         | 0.29     | 0.89     | 0.5759                       | 0.89         | 0.58     | 1.35     | 0.9522                                    | 0.99         | 0.62     | 1.58     |
| ESR1    | rs2234693  | 0.7352                            | 0.96         | 0.76     | 1.22     | 0.8987                                         | 0.98         | 0.75     | 1.29     | 0.9075                      | 0.98         | 0.68     | 1.40     | 0.7230                                   | 0.93         | 0.62     | 1.40     | 0.7420                       | 0.95         | 0.70     | 1.29     | 0.8925                                    | 1.02         | 0.72     | 1.46     |
| ESR1    | rs2347868  | 0.0452                            | 1.32         | 1.01     | 1.73     | 0.0127                                         | 1.47         | 1.09     | 1.99     | 0.2872                      | 1.25         | 0.83     | 1.90     | 0.1533                                   | 1.41         | 0.88     | 2.24     | 0.0543                       | 1.41         | 0.99     | 2.01     | 0.0257                                    | 1.57         | 1.06     | 2.32     |
| ESR1    | rs2347869  | 0.2998                            | 1.13         | 0.90     | 1.42     | 0.1838                                         | 1.20         | 0.92     | 1.56     | 0.0999                      | 1.34         | 0.95     | 1.91     | 0.0480                                   | 1.50         | 1.00     | 2.24     | 0.9956                       | 1.00         | 0.74     | 1.36     | 0.9340                                    | 1.01         | 0.71     | 1.44     |
| ESR1    | rs2747648  | 0.3102                            | 0.69         | 0.33     | 1.42     | 0.0978                                         | 0.39         | 0.13     | 1.19     | 0.7564                      | 0.83         | 0.26     | 2.65     | 0.6344                                   | 0.71         | 0.17     | 2.92     | 0.2671                       | 0.58         | 0.23     | 1.51     | 0.1044                                    | 0.20         | 0.03     | 1.39     |
| ESR1    | rs2813543  | 0.7199                            | 0.95         | 0.74     | 1.23     | 0.2607                                         | 0.84         | 0.62     | 1.14     | 0.7368                      | 0.94         | 0.65     | 1.36     | 0.6162                                   | 0.90         | 0.58     | 1.38     | 0.8718                       | 0.97         | 0.68     | 1.39     | 0.2816                                    | 0.79         | 0.51     | 1.21     |
| ESR1    | rs2982734  | 0.5541                            | 0.93         | 0.73     | 1.18     | 0.6025                                         | 1.07         | 0.82     | 1.41     | 0.7052                      | 1.07         | 0.76     | 1.51     | 0.8249                                   | 1.05         | 0.71     | 1.55     | 0.2402                       | 0.82         | 0.58     | 1.15     | 0.6052                                    | 1.10         | 0.76     | 1.61     |
| ESR1    | rs3003917  | 0.6498                            | 1.07         | 0.80     | 1.43     | 0.4851                                         | 1.12         | 0.81     | 1.56     | 0.5367                      | 1.15         | 0.74     | 1.79     | 0.5304                                   | 1.17         | 0.71     | 1.94     | 0.9181                       | 1.02         | 0.70     | 1.49     | 0.6797                                    | 1.09         | 0.71     | 1.68     |
| ESR1    | rs3020368  |                                   |              |          |          |                                                |              |          |          |                             |              |          |          |                                          |              |          |          |                              |              |          |          |                                           |              |          |          |

|      |            |        |      |      |      |        |       |      |      |        |      |      |       |        |      |      |       |        |      |      |      |        |      |      |      |
|------|------------|--------|------|------|------|--------|-------|------|------|--------|------|------|-------|--------|------|------|-------|--------|------|------|------|--------|------|------|------|
| ESR1 | rs3798565  | 0.0872 | 0.55 | 0.28 | 1.09 | 0.2323 | 0.64  | 0.31 | 1.32 | 0.0730 | 0.40 | 0.14 | 1.09  | 0.2077 | 0.52 | 0.19 | 1.44  | 0.8656 | 0.92 | 0.37 | 2.29 | 0.9589 | 0.97 | 0.35 | 2.69 |
| ESR1 | rs3798577  | 0.4011 | 1.10 | 0.88 | 1.37 | 0.1497 | 1.20  | 0.94 | 1.55 | 0.8649 | 0.97 | 0.69 | 1.37  | 0.8217 | 1.05 | 0.71 | 1.54  | 0.1895 | 1.21 | 0.91 | 1.61 | 0.0778 | 1.34 | 0.97 | 1.86 |
| ESR1 | rs3798758  | 0.5849 | 1.18 | 0.66 | 2.11 | 0.5040 | 1.25  | 0.65 | 2.37 | 0.5044 | 1.28 | 0.62 | 2.63  | 0.4043 | 1.39 | 0.64 | 3.03  | 0.7620 | 1.17 | 0.43 | 3.19 | 0.8119 | 1.15 | 0.36 | 3.67 |
| ESR1 | rs3853250  | 0.3634 | 0.90 | 0.72 | 1.13 | 0.4661 | 0.91  | 0.70 | 1.18 | 0.7168 | 0.93 | 0.65 | 1.35  | 0.5626 | 0.88 | 0.58 | 1.34  | 0.4082 | 0.89 | 0.67 | 1.18 | 0.6553 | 0.93 | 0.67 | 1.29 |
| ESR1 | rs4870056  | 0.4306 | 0.91 | 0.72 | 1.15 | 0.5342 | 0.92  | 0.70 | 1.20 | 0.8630 | 0.97 | 0.67 | 1.41  | 0.7189 | 0.92 | 0.60 | 1.42  | 0.4087 | 0.88 | 0.65 | 1.19 | 0.6306 | 0.92 | 0.65 | 1.30 |
| ESR1 | rs4870061  | 0.1358 | 1.22 | 0.94 | 1.59 | 0.0588 | 1.33  | 0.99 | 1.78 | 0.2854 | 1.25 | 0.83 | 1.87  | 0.1710 | 1.37 | 0.87 | 2.16  | 0.2384 | 1.23 | 0.87 | 1.73 | 0.1516 | 1.32 | 0.90 | 1.93 |
| ESR1 | rs4986934  | 0.3796 | 1.29 | 0.73 | 2.28 | 0.4374 | 1.29  | 0.68 | 2.47 | 0.7954 | 0.89 | 0.36 | 2.21  | 0.7426 | 1.17 | 0.46 | 2.93  | 0.0860 | 1.90 | 0.91 | 3.94 | 0.3544 | 1.54 | 0.62 | 3.85 |
| ESR1 | rs6909026  | 0.2665 | 1.40 | 0.77 | 2.55 | 0.1252 | 1.63  | 0.87 | 3.05 | 0.1012 | 1.77 | 0.89 | 3.49  | 0.0240 | 2.18 | 1.11 | 4.27  | 0.9178 | 0.94 | 0.30 | 2.99 | 0.7974 | 0.83 | 0.20 | 3.41 |
| ESR1 | rs6920483  | 0.6703 | 1.18 | 0.55 | 2.52 | 0.8201 | 1.11  | 0.45 | 2.72 | 0.3098 | 1.69 | 0.61 | 4.65  | 0.3963 | 1.66 | 0.52 | 5.33  | 0.7529 | 0.83 | 0.26 | 2.64 | 0.6666 | 0.73 | 0.18 | 3.01 |
| ESR1 | rs6930355  | 0.4580 | 0.89 | 0.64 | 1.22 | 0.7373 | 1.06  | 0.75 | 1.49 | 0.8398 | 0.95 | 0.59 | 1.53  | 0.8533 | 0.95 | 0.55 | 1.63  | 0.4077 | 0.83 | 0.54 | 1.29 | 0.5551 | 1.14 | 0.73 | 1.79 |
| ESR1 | rs750686   | 0.5604 | 0.93 | 0.73 | 1.19 | 0.7133 | 1.05  | 0.80 | 1.38 | 0.9229 | 1.02 | 0.71 | 1.45  | 0.9212 | 0.98 | 0.65 | 1.47  | 0.3811 | 0.86 | 0.62 | 1.20 | 0.5528 | 1.12 | 0.77 | 1.62 |
| ESR1 | rs867239   | 0.8169 | 1.08 | 0.55 | 2.12 | 0.8104 | 1.10  | 0.51 | 2.36 | 0.4059 | 1.43 | 0.62 | 3.30  | 0.3554 | 1.54 | 0.61 | 3.88  | 0.6996 | 0.80 | 0.25 | 2.52 | 0.6137 | 0.70 | 0.17 | 2.85 |
| ESR1 | rs926848   | 0.8369 | 0.94 | 0.52 | 1.70 | 0.9895 | 1.00  | 0.52 | 1.92 | 0.4885 | 0.73 | 0.31 | 1.76  | 0.5829 | 0.76 | 0.29 | 2.02  | 0.4277 | 1.40 | 0.61 | 3.22 | 0.3659 | 1.53 | 0.61 | 3.81 |
| ESR1 | rs9322331  | 0.6887 | 1.05 | 0.83 | 1.33 | 0.7646 | 1.04  | 0.80 | 1.36 | 0.9876 | 1.00 | 0.69 | 1.46  | 0.5338 | 0.87 | 0.57 | 1.34  | 0.6201 | 1.08 | 0.80 | 1.45 | 0.3815 | 1.16 | 0.83 | 1.62 |
| ESR1 | rs9322335  | 0.0901 | 1.26 | 0.96 | 1.64 | 0.0359 | 1.38  | 1.02 | 1.86 | 0.6457 | 1.10 | 0.73 | 1.65  | 0.4750 | 1.18 | 0.75 | 1.86  | 0.0556 | 1.41 | 0.99 | 2.00 | 0.0258 | 1.57 | 1.06 | 2.35 |
| ESR1 | rs9322336  | 0.0777 | 1.29 | 0.97 | 1.70 | 0.0869 | 1.32  | 0.96 | 1.82 | 0.8951 | 1.03 | 0.67 | 1.57  | 0.7880 | 1.07 | 0.66 | 1.73  | 0.0146 | 1.60 | 1.10 | 2.34 | 0.0255 | 1.64 | 1.06 | 2.54 |
| ESR1 | rs9322338  | 0.4823 | 1.38 | 0.56 | 3.36 | 0.1853 | 1.83  | 0.75 | 4.50 | 0.5816 | 1.39 | 0.43 | 4.42  | 0.3088 | 1.83 | 0.57 | 5.90  | 0.5346 | 1.56 | 0.38 | 6.36 | 0.3011 | 2.11 | 0.51 | 8.64 |
| ESR1 | rs9322348  | 0.0581 | 1.62 | 0.98 | 2.66 | 0.0933 | 1.63  | 0.92 | 2.90 | 0.9539 | 1.03 | 0.38 | 2.76  | 0.7481 | 1.18 | 0.44 | 3.16  | 0.0032 | 2.42 | 1.34 | 4.35 | 0.0156 | 2.42 | 1.18 | 4.97 |
| ESR1 | rs9340799  | 0.3470 | 1.12 | 0.88 | 1.44 | 0.3232 | 1.15  | 0.87 | 1.53 | 0.3301 | 1.21 | 0.82 | 1.77  | 0.5865 | 1.13 | 0.73 | 1.76  | 0.6346 | 1.08 | 0.79 | 1.48 | 0.3841 | 1.17 | 0.82 | 1.68 |
| ESR1 | rs9340817  | 0.3890 | 0.74 | 0.38 | 1.46 | 0.3805 | 0.70  | 0.31 | 1.56 | 0.6241 | 0.79 | 0.31 | 2.04  | 0.9867 | 0.99 | 0.39 | 2.55  | 0.5266 | 0.73 | 0.28 | 1.92 | 0.2936 | 0.39 | 0.07 | 2.26 |
| ESR1 | rs9340835  | 0.0127 | 0.71 | 0.54 | 0.93 | 0.0138 | 0.68  | 0.50 | 0.92 | 0.1033 | 0.73 | 0.49 | 1.07  | 0.0582 | 0.65 | 0.42 | 1.02  | 0.0677 | 0.70 | 0.48 | 1.03 | 0.1252 | 0.71 | 0.46 | 1.10 |
| ESR1 | rs9340941  | 0.7927 | 0.93 | 0.52 | 1.64 | 0.5590 | 0.82  | 0.41 | 1.61 | 0.9875 | 0.99 | 0.43 | 2.31  | 0.7225 | 0.83 | 0.30 | 2.31  | 0.7241 | 0.87 | 0.40 | 1.89 | 0.6424 | 0.80 | 0.32 | 2.01 |
| ESR1 | rs9340958  | 0.6714 | 0.90 | 0.57 | 1.44 | 0.9735 | 0.99  | 0.60 | 1.65 | 0.5350 | 1.21 | 0.67 | 2.19  | 0.4921 | 1.26 | 0.65 | 2.44  | 0.2430 | 0.65 | 0.31 | 1.34 | 0.4765 | 0.75 | 0.34 | 1.65 |
| ESR1 | rs9341004  | 0.2449 | 1.23 | 0.87 | 1.74 | 0.0450 | 1.46  | 1.01 | 2.12 | 0.2090 | 1.38 | 0.83 | 2.29  | 0.2774 | 1.38 | 0.77 | 2.45  | 0.6567 | 1.11 | 0.69 | 1.79 | 0.0894 | 1.52 | 0.94 | 2.47 |
| ESR1 | rs9341066  | 0.5984 | 1.13 | 0.72 | 1.79 | 0.4191 | 1.23  | 0.74 | 2.06 | 0.8659 | 0.94 | 0.47 | 1.89  | 0.9337 | 0.97 | 0.44 | 2.14  | 0.2403 | 1.45 | 0.78 | 2.67 | 0.1438 | 1.66 | 0.84 | 3.28 |
| ESR1 | rs9341070  | 0.5026 | 1.44 | 0.49 | 4.21 | 0.6847 | 0.67  | 0.10 | 4.59 | 0.8643 | 0.84 | 0.12 | 6.07  | 0.9416 | 1.08 | 0.15 | 7.79  | 0.2256 | 2.04 | 0.64 | 6.49 | 0.9968 | 0.00 | 0.00 | Inf  |
| ESR1 | rs9341072  | 0.0208 | 3.23 | 1.20 | 8.71 | 0.9944 | 0.00  | 0.00 | Inf  | NA     | 1.00 | 1.00 | 1.00  | NA     | 1.00 | 1.00 | 1.00  | 0.0304 | 3.03 | 1.11 | 8.28 | 0.9960 | 0.00 | 0.00 | Inf  |
| ESR1 | rs9341077  | 0.0287 | 0.41 | 0.18 | 0.91 | 0.0351 | 0.34  | 0.13 | 0.93 | 0.1357 | 0.34 | 0.08 | 1.40  | 0.1294 | 0.22 | 0.03 | 1.56  | 0.0932 | 0.43 | 0.16 | 1.15 | 0.1297 | 0.41 | 0.13 | 1.30 |
| ESR1 | rs9479188  | 0.9877 | 1.00 | 0.75 | 1.33 | 0.3993 | -0.87 | 0.83 | 1.57 | 0.7587 | 1.07 | 0.71 | 1.61  | 0.7046 | 1.09 | 0.69 | 1.74  | 0.7752 | 0.94 | 0.62 | 1.42 | 0.4069 | 1.20 | 0.78 | 1.87 |
| ESR2 | IU08-E2-01 | 0.8341 | 0.81 | 0.11 | 5.79 | 0.9560 | 1.06  | 0.15 | 7.57 | 0.6753 | 1.53 | 0.21 | 11.00 | 0.4964 | 1.99 | 0.27 | 14.41 | 0.9952 | 0.00 | 0.00 | Inf  | 0.9958 | 0.00 | 0.00 | Inf  |
| ESR2 | IU08-E2-02 | 0.9829 | 1.01 | 0.63 | 1.59 | 0.9884 | 1.00  | 0.59 | 1.69 | 0.9843 | 1.01 | 0.51 | 1.97  | 0.6253 | 1.20 | 0.58 | 2.46  | 0.9120 | 1.04 | 0.55 | 1.94 | 0.6852 | 0.85 | 0.39 | 1.86 |
| ESR2 | rs10140457 | 0.4148 | 0.74 | 0.35 | 1.54 | 0.6132 | 0.82  | 0.37 | 1.80 | 0.8024 | 1.12 | 0.45 | 2.79  | 0.8710 | 1.09 | 0.38 | 3.12  | 0.1752 | 0.45 | 0.14 | 1.43 | 0.3734 | 0.59 | 0.19 | 1.88 |
| ESR2 | rs1256031  | 0.9585 | 0.99 | 0.79 | 1.25 | 0.6649 | 1.06  | 0.81 | 1.38 | 0.8690 | 1.03 | 0.73 | 1.45  | 0.6703 | 1.09 | 0.73 | 1.62  | 0.6918 | 0.94 | 0.69 | 1.28 | 0.9736 | 1.01 | 0.70 | 1.44 |
| ESR2 | rs1256049  | 0.5191 | 0.81 | 0.43 | 1.54 | 0.9076 | 0.96  | 0.49 | 1.90 | 0.4095 | 0.65 | 0.24 | 1.80  | 0.7681 | 0.86 | 0.31 | 2.38  | 0.9935 | 1.00 | 0.43 | 2.29 | 0.8454 | 1.10 | 0.44 | 2.73 |
| ESR2 | rs1256059  | 0.6177 | 1.06 | 0.84 | 1.33 | 0.4570 | 1.10  | 0.85 | 1.43 | 0.9033 | 0.98 | 0.70 | 1.37  | 0.9120 | 1.02 | 0.70 | 1.50  | 0.5127 | 1.11 | 0.82 | 1.51 | 0.4324 | 1.15 | 0.81 | 1.64 |
| ESR2 | rs1256062  | 0.3443 | 0.85 | 0.61 | 1.19 | 0.3341 | 0.83  | 0.57 | 1.21 | 0.7431 | 1.09 | 0.66 | 1.78  | 0.9378 | 1.02 | 0.58 | 1.81  | 0.1142 | 0.70 | 0.45 | 1.09 | 0.1621 | 0.70 | 0.42 | 1.16 |
| ESR2 | rs1256064  | 0.8990 | 1.05 | 0.51 | 2.14 | 0.6301 | 1.21  | 0.56 | 2.59 | 0.0806 | 2.46 | 0.90 | 6.77  | 0.1368 | 2.42 | 0.76 | 7.78  | 0.3119 | 0.60 | 0.22 | 1.63 | 0.6505 | 0.79 | 0.29 | 2.18 |
| ESR2 | rs17766755 | 0.8068 | 1.03 | 0.81 | 1.32 | 0.6972 | 0.95  | 0.71 | 1.26 | 0.7153 | 0.94 | 0.65 | 1.34  | 0.3744 | 0.83 | 0.54 | 1.26  | 0.3566 | 1.17 | 0.84 | 1.64 | 0.5973 | 1.11 | 0.75 | 1.64 |
| ESR2 | rs1952585  | 0.5702 | 1.27 | 0.56 | 2.87 | 0.4724 | 1.39  | 0.57 | 3.41 | 0.0182 | 3.39 | 1.23 | 9.35  | 0.0394 | 3.42 | 1.06 | 11.00 | 0.3365 | 0.50 | 0.12 | 2.05 | 0.5580 | 0.66 | 0.16 | 2.69 |
| ESR2 | rs2274705  | 0.3854 | 1.16 | 0.83 | 1.63 | 0.5313 | 1.13  | 0.77 | 1.68 | 0.0480 | 1.65 | 1.00 | 2.72  | 0.1450 | 1.54 | 0.86 | 2.74  | 0.5138 | 0.85 | 0.53 | 1.38 | 0.6051 | 0.86 | 0.50 | 1.50 |
| ESR2 | rs3020450  | 0.7912 | 1.03 | 0.81 | 1.33 | 0.6219 | 0.93  | 0.70 | 1.24 | 0.4168 | 1.16 | 0.81 | 1.66  | 0.6874 | 1.09 | 0.72 | 1.64  | 0.7580 | 0.95 | 0.67 | 1.34 | 0.3310 | 0.82 | 0.54 | 1.23 |
| ESR2 | rs4986938  | 0.9140 | 1.01 | 0.81 | 1.27 | 0.6871 | 0.95  | 0.73 | 1.23 | 0.3751 | 0.86 | 0.61 | 1.21  | 0.1860 | 0.76 | 0.51 | 1.14  | 0.2304 | 1.21 | 0.89 | 1.64 | 0.3689 | 1.18 | 0.83 | 1.67 |
| ESR2 | rs8003490  | 0.8537 | 1.04 | 0.67 | 1.61 | 0.6316 | 0.88  | 0.51 | 1.50 | 0.2533 | 1.44 | 0.77 | 2.70  | 0.6091 | 1.22 | 0.57 | 2.60  | 0.4407 | 0.78 | 0.42 | 1.45 | 0.2745 | 0.65 | 0.30 | 1.40 |
| ESR2 | rs8006145  | 0.8255 | 1.03 | 0.80 | 1.32 | 0.9560 | 0.99  | 0.74 | 1.32 | 0.6278 | 0.91 | 0.63 | 1.33  | 0.6662 | 0.91 | 0.60 | 1.39  | 0.3096 | 1.19 | 0.85 | 1.68 | 0.5756 | 1.12 | 0.75 | 1.66 |
| ESR2 | rs867443   | 0.7085 | 1.05 | 0.81 | 1.35 | 0.9684 | 1.01  | 0.75 | 1.35 | 0.3930 | 0.85 | 0.58 | 1.24  | 0.3461 | 0.81 | 0.52 | 1.26  | 0.1007 | 1.34 | 0.95 | 1.89 | 0.2163 | 1.28 | 0.86 | 1.91 |
| ESR2 | rs944045   | 0.6104 | 1.09 | 0.77 | 1.55 | 0.8318 | 1.05  | 0.70 | 1.57 | 0.0706 | 1.62 | 0.96 | 2.74  | 0.2682 | 1.42 | 0.76 | 2.67  | 0.4243 | 0.82 | 0.50 | 1.34 | 0.5195 | 0.83 | 0.48 | 1.45 |
| ESR2 | rs944460   | 0.0630 | 0.50 | 0.24 | 1.04 | 0.1470 | 0.56  | 0.26 | 1.23 | 0.1498 | 0.44 | 0.14 | 1.35  | 0.3207 | 0.57 | 0.18 | 1.74  | 0.2384 | 0.57 | 0.22 | 1.45 | 0.2978 | 0.56 | 0.19 | 1.66 |
| EZH2 | rs2302427  | 0.8529 | 1.04 | 0.67 | 1.64 | 0.8917 | 1.04  | 0.62 | 1.73 | 0.5252 | 0.79 | 0.37 | 1.65  | 0.3160 | 0.62 | 0.25 | 1.57  | 0.3822 | 1.28 | 0.74 | 2.22 | 0.2536 | 1.42 | 0.78 | 2.58 |
| HCRT | rs41513044 | 0.7503 | 0.83 | 0.26 | 2.61 | 0.8920 | 1.08  | 0.34 | 3.41 | 0.6623 | 0.64 | 0.09 | 4.64  | 0.8551 | 0.83 | 0.11 | 6.02  | 0.95   |      |      |      |        |      |      |      |

|        |            |        |      |      |      |        |      |      |      |        |      |      |      |        |       |      |      |        |      |      |       |        |      |      |       |
|--------|------------|--------|------|------|------|--------|------|------|------|--------|------|------|------|--------|-------|------|------|--------|------|------|-------|--------|------|------|-------|
| HTR2A  | rs2274639  | 0.7896 | 0.96 | 0.69 | 1.33 | 0.7194 | 1.07 | 0.75 | 1.53 | 0.9740 | 1.01 | 0.63 | 1.62 | 0.5275 | 1.18  | 0.71 | 1.95 | 0.7111 | 0.92 | 0.58 | 1.45  | 0.9336 | 0.98 | 0.59 | 1.64  |
| HTR2A  | rs2296972  | 0.0014 | 0.68 | 0.53 | 0.86 | 0.0101 | 0.70 | 0.53 | 0.92 | 0.1375 | 0.78 | 0.56 | 1.08 | 0.2243 | 0.79  | 0.55 | 1.15 | 0.0047 | 0.60 | 0.42 | 0.86  | 0.0243 | 0.63 | 0.42 | 0.94  |
| HTR2A  | rs3742278  | 0.9821 | 1.00 | 0.74 | 1.37 | 0.7920 | 0.95 | 0.66 | 1.37 | 0.6211 | 0.88 | 0.54 | 1.44 | 0.4366 | 0.79  | 0.44 | 1.42 | 0.5666 | 1.12 | 0.75 | 1.68  | 0.6624 | 1.11 | 0.70 | 1.76  |
| HTR2A  | rs594242   | 0.3379 | 0.86 | 0.64 | 1.17 | 0.2682 | 0.82 | 0.58 | 1.16 | 0.2778 | 1.28 | 0.82 | 1.98 | 0.4690 | 1.21  | 0.73 | 2.01 | 0.0304 | 0.62 | 0.41 | 0.96  | 0.0394 | 0.59 | 0.36 | 0.97  |
| HTR2A  | rs6306     | 0.8264 | 1.05 | 0.67 | 1.65 | 0.6641 | 1.12 | 0.68 | 1.85 | 0.9549 | 1.02 | 0.50 | 2.07 | 0.4354 | 1.33  | 0.65 | 2.69 | 0.9265 | 1.03 | 0.57 | 1.86  | 0.8207 | 0.92 | 0.45 | 1.87  |
| HTR2A  | rs6308     | 0.8729 | 0.85 | 0.12 | 6.09 | 0.9284 | 1.09 | 0.15 | 7.84 | 0.9966 | 0.00 | 0.00 | Inf  | 0.9970 | 0.00  | 0.00 | Inf  | 0.9748 | 1.03 | 0.14 | 7.42  | 0.7761 | 1.33 | 0.18 | 9.62  |
| HTR2A  | rs6311     | 0.7038 | 0.96 | 0.76 | 1.21 | 0.9725 | 1.00 | 0.77 | 1.31 | 0.3610 | 0.85 | 0.60 | 1.20 | 0.2112 | 0.78  | 0.52 | 1.15 | 0.6130 | 1.09 | 0.79 | 1.49  | 0.1670 | 1.29 | 0.90 | 1.85  |
| HTR2A  | rs6313     | 0.9767 | 1.00 | 0.79 | 1.26 | 0.7564 | 1.04 | 0.80 | 1.37 | 0.3398 | 0.84 | 0.59 | 1.20 | 0.1822 | 0.76  | 0.51 | 1.14 | 0.3139 | 1.18 | 0.85 | 1.63  | 0.0685 | 1.41 | 0.97 | 2.03  |
| HTR2A  | rs731779   | 0.2169 | 1.22 | 0.89 | 1.66 | 0.0505 | 1.41 | 1.00 | 2.00 | 0.2229 | 1.33 | 0.84 | 2.12 | 0.0190 | 1.81  | 1.10 | 2.96 | 0.7161 | 1.08 | 0.71 | 1.64  | 0.7126 | 1.10 | 0.67 | 1.78  |
| HTR2A  | rs7997012  | 0.0481 | 0.79 | 0.62 | 1.00 | 0.0340 | 0.74 | 0.56 | 0.98 | 0.5608 | 0.90 | 0.64 | 1.28 | 0.7124 | 0.93  | 0.62 | 1.38 | 0.0322 | 0.70 | 0.50 | 0.97  | 0.0115 | 0.61 | 0.41 | 0.89  |
| HTR2A  | rs9567746  | 0.1676 | 1.24 | 0.91 | 1.69 | 0.0457 | 1.42 | 1.01 | 2.00 | 0.2917 | 1.28 | 0.81 | 2.05 | 0.0284 | 1.74  | 1.06 | 2.86 | 0.4516 | 1.17 | 0.77 | 1.78  | 0.5528 | 1.16 | 0.72 | 1.86  |
| NCOA1  | rs11125744 | 0.0857 | 0.73 | 0.51 | 1.04 | 0.5451 | 0.89 | 0.62 | 1.29 | 0.4515 | 0.81 | 0.47 | 1.40 | 0.8377 | 1.06  | 0.61 | 1.83 | 0.0782 | 0.65 | 0.41 | 1.05  | 0.2715 | 0.75 | 0.45 | 1.25  |
| NCOA1  | rs17737058 | 0.2014 | 1.20 | 0.91 | 1.57 | 0.8441 | 1.03 | 0.75 | 1.43 | 0.3160 | 1.24 | 0.81 | 1.90 | 0.4906 | -1.20 | 0.49 | 1.41 | 0.4703 | 1.14 | 0.80 | 1.64  | 0.4620 | 1.17 | 0.78 | 1.75  |
| NCOA1  | rs1804645  | 0.9019 | 0.96 | 0.53 | 1.74 | 0.8647 | 1.06 | 0.55 | 2.02 | 0.3162 | 0.55 | 0.17 | 1.76 | 0.5932 | 0.73  | 0.23 | 2.34 | 0.4912 | 1.27 | 0.64 | 2.55  | 0.5092 | 1.30 | 0.59 | 2.86  |
| NCOA1  | rs2033861  | 0.8192 | 0.97 | 0.77 | 1.24 | 0.3589 | 0.88 | 0.66 | 1.16 | 0.7685 | 1.05 | 0.74 | 1.50 | 0.9553 | 1.01  | 0.68 | 1.52 | 0.6047 | 0.92 | 0.66 | 1.27  | 0.2121 | 0.78 | 0.53 | 1.15  |
| NCOA1  | rs2083389  | 0.1191 | 1.25 | 0.94 | 1.64 | 0.6462 | 1.08 | 0.78 | 1.50 | 0.2888 | 1.26 | 0.82 | 1.93 | 0.3761 | 0.79  | 0.46 | 1.34 | 0.3054 | 1.21 | 0.84 | 1.73  | 0.2135 | 1.30 | 0.86 | 1.95  |
| NCOA1  | rs3731628  | 0.5997 | 1.13 | 0.71 | 1.79 | 0.4682 | 1.21 | 0.72 | 2.03 | 0.9548 | 0.98 | 0.49 | 1.98 | 0.9665 | 0.98  | 0.44 | 2.18 | 0.3492 | 1.34 | 0.73 | 2.47  | 0.2308 | 1.51 | 0.77 | 2.97  |
| NCOA1  | rs920418   | 0.2237 | 0.87 | 0.70 | 1.09 | 0.4878 | 0.91 | 0.71 | 1.18 | 0.7033 | 0.94 | 0.66 | 1.32 | 0.7214 | 0.93  | 0.63 | 1.38 | 0.1721 | 0.81 | 0.61 | 1.09  | 0.4813 | 0.89 | 0.64 | 1.24  |
| NCOA2  | rs1380896  | 0.9819 | 1.00 | 0.75 | 1.34 | 0.4627 | 1.13 | 0.82 | 1.56 | 0.0895 | 1.38 | 0.95 | 2.01 | 0.1189 | 1.41  | 0.92 | 2.16 | 0.1079 | 0.69 | 0.44 | 1.09  | 0.6099 | 0.88 | 0.54 | 1.43  |
| NCOA2  | rs2228591  | 0.9888 | 1.00 | 0.59 | 1.68 | 0.3180 | 1.31 | 0.77 | 2.21 | 0.4480 | 0.69 | 0.27 | 1.79 | 0.7805 | 0.87  | 0.34 | 2.24 | 0.4934 | 1.26 | 0.65 | 2.44  | 0.1033 | 1.75 | 0.89 | 3.45  |
| NCOA2  | rs2272670  | 0.6752 | 1.06 | 0.81 | 1.37 | 0.3322 | 1.16 | 0.86 | 1.55 | 0.1802 | 1.28 | 0.89 | 1.85 | 0.2021 | 1.31  | 0.87 | 1.98 | 0.5227 | 0.88 | 0.61 | 1.29  | 0.8657 | 1.04 | 0.68 | 1.57  |
| NCOA2  | rs3088092  | 0.9610 | 1.01 | 0.61 | 1.68 | 0.8184 | 1.07 | 0.61 | 1.88 | 0.7684 | 0.89 | 0.40 | 1.95 | 0.9894 | 1.01  | 0.43 | 2.37 | 0.6208 | 1.18 | 0.62 | 2.25  | 0.6586 | 1.18 | 0.57 | 2.46  |
| NCOA2  | rs4738079  | 0.4674 | 0.84 | 0.53 | 1.33 | 0.4188 | 0.80 | 0.47 | 1.37 | 0.4692 | 1.25 | 0.69 | 2.27 | 0.8075 | 1.09  | 0.53 | 2.26 | 0.1064 | 0.56 | 0.28 | 1.13  | 0.1906 | 0.59 | 0.27 | 1.30  |
| NCOA3  | rs2076546  | 0.2267 | 0.78 | 0.51 | 1.17 | 0.3862 | 0.82 | 0.51 | 1.29 | 0.1451 | 0.57 | 0.26 | 1.22 | 0.0832 | 0.41  | 0.15 | 1.12 | 0.5947 | 0.87 | 0.53 | 1.43  | 0.8661 | 1.05 | 0.62 | 1.77  |
| NCOA3  | rs2230782  | 0.8052 | 1.06 | 0.68 | 1.66 | 0.4941 | 1.19 | 0.73 | 1.93 | 0.5656 | 1.23 | 0.61 | 2.49 | 0.3815 | 1.40  | 0.66 | 2.97 | 0.7190 | 0.90 | 0.50 | 1.61  | 0.9780 | 0.99 | 0.52 | 1.87  |
| NCOA3  | rs365602   | 0.1761 | 0.75 | 0.50 | 1.14 | 0.1038 | 0.66 | 0.40 | 1.09 | 0.0379 | 0.45 | 0.21 | 0.96 | 0.0417 | 0.40  | 0.16 | 0.97 | 0.7451 | 1.09 | 0.66 | 1.79  | 0.9307 | 0.97 | 0.53 | 1.78  |
| NCOA3  | rs396221   | 0.8180 | 1.03 | 0.80 | 1.32 | 0.6331 | 1.07 | 0.81 | 1.42 | 0.5596 | 0.90 | 0.62 | 1.30 | 0.3213 | 0.80  | 0.52 | 1.24 | 0.5651 | 1.10 | 0.79 | 1.54  | 0.1849 | 1.30 | 0.88 | 1.91  |
| NCOA3  | rs6094752  | 0.5946 | 0.87 | 0.53 | 1.44 | 0.7800 | 0.92 | 0.53 | 1.61 | 0.9185 | 1.03 | 0.55 | 1.93 | 0.8372 | 1.08  | 0.53 | 2.17 | 0.4629 | 0.73 | 0.32 | 1.68  | 0.6268 | 0.80 | 0.32 | 1.99  |
| NCOR1  | rs1065822  | 0.2031 | 0.87 | 0.70 | 1.08 | 0.2084 | 0.85 | 0.66 | 1.09 | 0.0749 | 0.73 | 0.52 | 1.03 | 0.1746 | 0.77  | 0.52 | 1.12 | 0.9038 | 1.02 | 0.76 | 1.36  | 0.7904 | 0.96 | 0.69 | 1.33  |
| NCOR1  | rs1073093  | 0.4142 | 0.74 | 0.36 | 1.52 | 0.2492 | 0.59 | 0.24 | 1.45 | 0.4407 | 0.63 | 0.20 | 2.02 | 0.3976 | 0.54  | 0.13 | 2.23 | 0.6827 | 0.83 | 0.34 | 2.05  | 0.4281 | 0.63 | 0.20 | 1.99  |
| NCOR1  | rs61753150 | 0.1385 | 0.35 | 0.09 | 1.41 | 0.1395 | 0.23 | 0.03 | 1.62 | 0.4045 | 0.43 | 0.06 | 3.12 | 0.5829 | 0.57  | 0.08 | 4.17 | 0.2156 | 0.29 | 0.04 | 2.07  | 0.9956 | 0.00 | 0.00 | Inf   |
| NCOR2  | rs1812730  | 0.4622 | 0.91 | 0.72 | 1.16 | 0.7815 | 0.96 | 0.74 | 1.26 | 0.3333 | 0.84 | 0.59 | 1.20 | 0.5546 | 0.88  | 0.59 | 1.33 | 0.7674 | 0.95 | 0.69 | 1.31  | 0.9914 | 1.00 | 0.69 | 1.44  |
| NCOR2  | rs2229840  | 0.6039 | 1.09 | 0.79 | 1.50 | 0.9796 | 1.00 | 0.68 | 1.45 | 0.7269 | 0.91 | 0.55 | 1.52 | 0.9365 | 0.98  | 0.55 | 1.73 | 0.2426 | 1.27 | 0.85 | 1.90  | 0.8394 | 1.05 | 0.64 | 1.72  |
| NCOR2  | rs7978237  | 0.3761 | 1.15 | 0.84 | 1.57 | 0.6729 | 1.08 | 0.75 | 1.56 | 0.1429 | 1.35 | 0.90 | 2.02 | 0.1762 | 1.38  | 0.87 | 2.18 | 0.9393 | 1.02 | 0.62 | 1.69  | 0.6072 | 0.85 | 0.46 | 1.58  |
| NCOR2  | rs837935   | 0.7761 | 1.04 | 0.81 | 1.32 | 0.8750 | 0.98 | 0.74 | 1.29 | 0.8811 | 0.97 | 0.69 | 1.38 | 0.6200 | 0.90  | 0.60 | 1.35 | 0.5735 | 1.10 | 0.79 | 1.54  | 0.7825 | 1.06 | 0.72 | 1.54  |
| NRIP1  | rs2229742  | 0.7766 | 0.95 | 0.65 | 1.38 | 0.9697 | 0.99 | 0.65 | 1.51 | 0.8409 | 1.06 | 0.60 | 1.88 | 0.5909 | 1.19  | 0.64 | 2.21 | 0.5567 | 0.86 | 0.53 | 1.41  | 0.5867 | 0.85 | 0.48 | 1.51  |
| PELP1  | rs9436     | 0.6302 | 0.94 | 0.72 | 1.22 | 0.5875 | 0.92 | 0.67 | 1.25 | 0.4927 | 0.86 | 0.56 | 1.32 | 0.8739 | 0.96  | 0.60 | 1.54 | 0.9526 | 0.99 | 0.70 | 1.39  | 0.5659 | 0.89 | 0.59 | 1.33  |
| PGR    | rs1042838  | 0.8241 | 1.04 | 0.76 | 1.42 | 0.7289 | 1.06 | 0.75 | 1.51 | 0.1011 | 1.40 | 0.94 | 2.08 | 0.1206 | 1.42  | 0.91 | 2.23 | 0.1809 | 0.72 | 0.44 | 1.17  | 0.2779 | 0.74 | 0.43 | 1.28  |
| PGR    | rs11571171 | 0.4162 | 1.11 | 0.86 | 1.43 | 0.5708 | 1.09 | 0.82 | 1.45 | 0.5454 | 1.12 | 0.77 | 1.64 | 0.3493 | 1.22  | 0.80 | 1.86 | 0.6354 | 1.09 | 0.77 | 1.53  | 0.8850 | 0.97 | 0.66 | 1.44  |
| PGR    | rs500760   | 0.6528 | 1.06 | 0.82 | 1.37 | 0.5823 | 1.08 | 0.81 | 1.45 | 0.0692 | 1.38 | 0.97 | 1.96 | 0.1559 | 1.34  | 0.89 | 2.01 | 0.2487 | 0.80 | 0.56 | 1.16  | 0.5134 | 0.87 | 0.57 | 1.32  |
| PGR    | rs506487   | 0.3679 | 0.89 | 0.70 | 1.14 | 0.1342 | 0.80 | 0.60 | 1.07 | 0.0696 | 0.70 | 0.48 | 1.03 | 0.0346 | 0.62  | 0.40 | 0.97 | 0.5800 | 1.09 | 0.80 | 1.50  | 0.9842 | 1.00 | 0.69 | 1.46  |
| PGR    | rs516693   | 0.6416 | 0.92 | 0.65 | 1.31 | 0.9941 | 1.00 | 0.68 | 1.48 | 0.7324 | 1.09 | 0.66 | 1.82 | 0.6560 | 1.14  | 0.64 | 2.02 | 0.3737 | 0.80 | 0.49 | 1.31  | 0.7020 | 0.90 | 0.53 | 1.54  |
| PGR    | rs518162   | 0.5157 | 1.13 | 0.78 | 1.62 | 0.1106 | 1.37 | 0.93 | 2.01 | 0.2923 | 1.31 | 0.79 | 2.15 | 0.2429 | 1.39  | 0.80 | 2.41 | 0.8755 | 0.96 | 0.56 | 1.63  | 0.3042 | 1.33 | 0.77 | 2.28  |
| PGR    | rs660149   | 0.0477 | 1.29 | 1.00 | 1.66 | 0.0812 | 1.29 | 0.97 | 1.72 | 0.0664 | 1.44 | 0.98 | 2.11 | 0.1115 | 1.43  | 0.92 | 2.21 | 0.3431 | 1.17 | 0.84 | 1.63  | 0.3958 | 1.18 | 0.81 | 1.72  |
| PGR    | rs7116336  | 0.2716 | 0.79 | 0.52 | 1.20 | 0.3488 | 0.79 | 0.49 | 1.29 | 0.0764 | 0.50 | 0.23 | 1.08 | 0.0838 | 0.43  | 0.17 | 1.12 | 0.7502 | 1.09 | 0.64 | 1.86  | 0.5758 | 1.19 | 0.65 | 2.16  |
| SLC6A4 | rs140700   | 0.8406 | 1.04 | 0.70 | 1.56 | 0.8617 | 1.04 | 0.66 | 1.65 | 0.5962 | 0.84 | 0.44 | 1.61 | 0.6927 | 0.86  | 0.42 | 1.79 | 0.3891 | 1.25 | 0.75 | 2.10  | 0.4894 | 1.23 | 0.68 | 2.23  |
| SLC6A4 | rs16965628 | 0.2269 | 0.76 | 0.49 | 1.18 | 0.2105 | 0.72 | 0.43 | 1.20 | 0.6107 | 0.86 | 0.49 | 1.53 | 0.4320 | 0.76  | 0.38 | 1.51 | 0.2932 | 0.69 | 0.34 | 1.38  | 0.3959 | 0.71 | 0.32 | 1.56  |
| SLC6A4 | rs25531    | 0.9834 | 1.01 | 0.47 | 2.16 | 0.4683 | 1.33 | 0.62 | 2.86 | 0.8781 | 1.07 | 0.46 | 2.48 | 0.4439 | 1.40  | 0.59 | 3.27 | 0.4554 | 2.12 | 0.29 | 15.33 | 0.2856 | 2.95 | 0.41 | 21.39 |
| SLC6A4 | rs25532    | 0.6448 | 0.92 | 0.63 | 1.33 | 0.9752 | 1.01 | 0.67 | 1.52 | 0.6798 | 1.12 | 0.66 | 1.87 | 0.3692 | 1.29  | 0.74 | 2.26 | 0.2904 | 0.75 |      |       |        |      |      |       |

Dominant Model

| GENE    | SNPSFX          | Both Drugs Combined: Side Effects |        |       |       | Both Drugs Combined: Side Effects Due to AIMSS |        |       |       | Letrozole Only Side Effects |        |       |       | Letrozole Only Side Effects Due to AIMSS |        |       |       | Exemestane Only Side Effects |        |       |       | Exemestane Only Side Effects Due to AIMSS |        |       |       |
|---------|-----------------|-----------------------------------|--------|-------|-------|------------------------------------------------|--------|-------|-------|-----------------------------|--------|-------|-------|------------------------------------------|--------|-------|-------|------------------------------|--------|-------|-------|-------------------------------------------|--------|-------|-------|
|         |                 | P-value                           | Hazard | Lower | Upper | P-value                                        | Hazard | Lower | Upper | P-value                     | Hazard | Lower | Upper | P-value                                  | Hazard | Lower | Upper | P-value                      | Hazard | Lower | Upper | P-value                                   | Hazard | Lower | Upper |
|         |                 |                                   | Ratio  | CI    | CI    |                                                | Ratio  | CI    | CI    |                             | Ratio  | CI    | CI    |                                          | Ratio  | CI    | CI    |                              | Ratio  | CI    | CI    |                                           | Ratio  | CI    | CI    |
| ARVCF   | rs165815        | 0.0704                            | 0.72   | 0.50  | 1.03  | 0.1058                                         | 0.71   | 0.47  | 1.07  | 0.0898                      | 0.61   | 0.34  | 1.08  | 0.1732                                   | 0.64   | 0.33  | 1.22  | 0.3032                       | 0.79   | 0.50  | 1.24  | 0.2946                                    | 0.75   | 0.44  | 1.28  |
| COMT    | rs4646310       | 0.3419                            | 0.84   | 0.58  | 1.21  | 0.1572                                         | 0.73   | 0.48  | 1.13  | 0.9144                      | 1.03   | 0.61  | 1.74  | 0.9032                                   | 0.96   | 0.53  | 1.76  | 0.1667                       | 0.70   | 0.42  | 1.16  | 0.0738                                    | 0.57   | 0.31  | 1.06  |
| COMT    | rs933271        | 0.0789                            | 0.75   | 0.55  | 1.03  | 0.1953                                         | 0.79   | 0.55  | 1.13  | 0.3495                      | 0.80   | 0.49  | 1.28  | 0.8183                                   | 0.94   | 0.54  | 1.62  | 0.1303                       | 0.72   | 0.47  | 1.10  | 0.1295                                    | 0.68   | 0.42  | 1.12  |
| COMT    | rs6269          | 0.7722                            | 0.95   | 0.69  | 1.32  | 0.7372                                         | 0.94   | 0.65  | 1.36  | 0.5741                      | 1.16   | 0.70  | 1.91  | 0.8634                                   | 1.05   | 0.60  | 1.85  | 0.3586                       | 0.82   | 0.53  | 1.26  | 0.5205                                    | 0.85   | 0.52  | 1.40  |
| COMT    | rs4633          | 0.0608                            | 1.45   | 0.98  | 2.13  | 0.0576                                         | 1.55   | 0.99  | 2.42  | 0.2067                      | 1.43   | 0.82  | 2.47  | 0.2442                                   | 1.45   | 0.77  | 2.72  | 0.2297                       | 1.40   | 0.81  | 2.41  | 0.1737                                    | 1.57   | 0.82  | 3.01  |
| COMT    | rs4818          | 0.8803                            | 0.97   | 0.68  | 1.39  | 0.7901                                         | 0.95   | 0.63  | 1.42  | 0.5068                      | 1.20   | 0.71  | 2.03  | 0.8220                                   | 1.07   | 0.59  | 1.95  | 0.3751                       | 0.81   | 0.50  | 1.30  | 0.5174                                    | 0.83   | 0.48  | 1.45  |
| COMT    | rs4680          | 0.4162                            | 1.17   | 0.80  | 1.70  | 0.3595                                         | 1.23   | 0.79  | 1.90  | 0.7568                      | 1.09   | 0.64  | 1.85  | 0.7607                                   | 1.10   | 0.60  | 2.03  | 0.5905                       | 1.16   | 0.68  | 1.98  | 0.4739                                    | 1.26   | 0.67  | 2.37  |
| COMT    | rs165774        | 0.0725                            | 1.34   | 0.97  | 1.86  | 0.0601                                         | 1.42   | 0.99  | 2.06  | 0.1933                      | 1.38   | 0.85  | 2.24  | 0.0946                                   | 1.60   | 0.92  | 2.79  | 0.2605                       | 1.28   | 0.83  | 1.98  | 0.3552                                    | 1.26   | 0.77  | 2.07  |
| COMT    | rs165599        | 0.0813                            | 0.75   | 0.55  | 1.04  | 0.0940                                         | 0.73   | 0.51  | 1.05  | 0.1911                      | 0.73   | 0.45  | 1.17  | 0.1884                                   | 0.69   | 0.40  | 1.20  | 0.2183                       | 0.76   | 0.49  | 1.17  | 0.2600                                    | 0.75   | 0.46  | 1.23  |
| CYP19A1 | rs4646          | 0.0861                            | 0.75   | 0.55  | 1.04  | 0.0209                                         | 0.64   | 0.44  | 0.94  | 0.0458                      | 0.61   | 0.37  | 0.99  | 0.0188                                   | 0.50   | 0.28  | 0.89  | 0.5529                       | 0.88   | 0.57  | 1.35  | 0.3033                                    | 0.77   | 0.47  | 1.27  |
| CYP19A1 | rs10046         | 0.9493                            | 0.99   | 0.69  | 1.42  | 0.7714                                         | 1.06   | 0.70  | 1.62  | 0.7684                      | 0.92   | 0.54  | 1.57  | 0.7636                                   | 1.10   | 0.59  | 2.06  | 0.8842                       | 1.04   | 0.63  | 1.70  | 0.9323                                    | 1.02   | 0.58  | 1.81  |
| CYP19A1 | rs2289105       | 0.7224                            | 0.94   | 0.65  | 1.34  | 0.9693                                         | 0.99   | 0.65  | 1.51  | 0.7201                      | 0.91   | 0.53  | 1.55  | 0.8282                                   | 1.07   | 0.57  | 2.02  | 0.8315                       | 0.95   | 0.58  | 1.54  | 0.7599                                    | 0.92   | 0.53  | 1.60  |
| CYP19A1 | rs28757184      | 0.2358                            | 0.58   | 0.24  | 1.42  | 0.5688                                         | 0.77   | 0.31  | 1.89  | 0.2319                      | 0.42   | 0.10  | 1.73  | 0.4084                                   | 0.55   | 0.13  | 2.27  | 0.7281                       | 0.82   | 0.26  | 2.58  | 0.8755                                    | 1.10   | 0.34  | 3.50  |
| CYP19A1 | rs700518        | 0.9081                            | 1.02   | 0.71  | 1.46  | 0.7283                                         | 1.08   | 0.71  | 1.62  | 0.8399                      | 1.06   | 0.63  | 1.78  | 0.5116                                   | 1.23   | 0.67  | 2.27  | 0.8565                       | 0.96   | 0.59  | 1.56  | 0.7822                                    | 0.92   | 0.53  | 1.61  |
| CYP19A1 | rs3759811       | 0.8471                            | 1.04   | 0.71  | 1.51  | 0.5765                                         | 1.13   | 0.73  | 1.76  | 0.9480                      | 1.02   | 0.60  | 1.73  | 0.5648                                   | 1.20   | 0.65  | 2.22  | 0.9140                       | 1.03   | 0.60  | 1.76  | 0.8812                                    | 1.05   | 0.56  | 1.96  |
| CYP19A1 | rs2414096       | 0.9268                            | 1.02   | 0.69  | 1.51  | 0.6366                                         | 1.12   | 0.70  | 1.78  | 0.9498                      | 1.02   | 0.58  | 1.78  | 0.6016                                   | 1.19   | 0.61  | 2.33  | 0.9866                       | 1.00   | 0.58  | 1.74  | 0.9109                                    | 1.04   | 0.54  | 2.00  |
| CYP19A1 | rs727479        | 0.7356                            | 0.95   | 0.69  | 1.30  | 0.9680                                         | 1.01   | 0.70  | 1.45  | 0.9144                      | 0.97   | 0.60  | 1.57  | 0.8396                                   | 1.06   | 0.61  | 1.83  | 0.6982                       | 0.92   | 0.60  | 1.41  | 0.8742                                    | 0.96   | 0.59  | 1.58  |
| CYP19A1 | rs4775936       | 0.5387                            | 1.11   | 0.79  | 1.58  | 0.5450                                         | 1.13   | 0.76  | 1.68  | 0.6228                      | 1.14   | 0.68  | 1.89  | 0.4448                                   | 1.26   | 0.70  | 2.27  | 0.8221                       | 1.06   | 0.66  | 1.70  | 0.9784                                    | 0.99   | 0.58  | 1.70  |
| CYP19A1 | rs10459592      | 0.4396                            | 0.87   | 0.62  | 1.23  | 0.8227                                         | 1.05   | 0.70  | 1.56  | 0.9780                      | 1.01   | 0.59  | 1.71  | 0.3891                                   | 1.33   | 0.70  | 2.53  | 0.3654                       | 0.81   | 0.52  | 1.27  | 0.7339                                    | 0.91   | 0.55  | 1.53  |
| CYP19A1 | rs1062033       | 0.5065                            | 1.12   | 0.80  | 1.58  | 0.5151                                         | 1.14   | 0.77  | 1.69  | 0.6261                      | 1.14   | 0.68  | 1.89  | 0.5305                                   | 1.21   | 0.67  | 2.17  | 0.7798                       | 1.07   | 0.67  | 1.70  | 0.8804                                    | 1.04   | 0.61  | 1.77  |
| CYP19A1 | rs2008691       | 0.4614                            | 0.88   | 0.63  | 1.24  | 0.9962                                         | 1.00   | 0.68  | 1.46  | 0.3972                      | 0.80   | 0.49  | 1.33  | 0.8768                                   | 0.96   | 0.55  | 1.67  | 0.9747                       | 1.01   | 0.63  | 1.60  | 0.7156                                    | 1.10   | 0.65  | 1.86  |
| CYP19A1 | rs1008805       | 0.3979                            | 0.86   | 0.62  | 1.21  | 0.3189                                         | 0.82   | 0.56  | 1.21  | 0.4926                      | 0.83   | 0.50  | 1.40  | 0.2033                                   | 0.69   | 0.39  | 1.22  | 0.7378                       | 0.93   | 0.59  | 1.45  | 0.9482                                    | 0.98   | 0.58  | 1.66  |
| CYP19A1 | rs749292        | 0.5223                            | 1.12   | 0.79  | 1.60  | 0.4335                                         | 1.18   | 0.78  | 1.77  | 0.2472                      | 1.37   | 0.80  | 2.33  | 0.2088                                   | 1.48   | 0.80  | 2.73  | 0.6995                       | 0.91   | 0.56  | 1.47  | 0.7855                                    | 0.93   | 0.53  | 1.61  |
| CYP19A1 | rs7181886       | 0.7341                            | 1.08   | 0.70  | 1.67  | 0.3088                                         | 1.28   | 0.80  | 2.06  | 0.8127                      | 0.92   | 0.48  | 1.77  | 0.4724                                   | 1.28   | 0.65  | 2.50  | 0.2957                       | 1.37   | 0.76  | 2.49  | 0.3123                                    | 1.42   | 0.72  | 2.81  |
| CYP19A1 | rs936308        | 0.5386                            | 0.90   | 0.64  | 1.26  | 0.8523                                         | 1.04   | 0.71  | 1.52  | 0.4588                      | 0.83   | 0.50  | 1.37  | 0.9721                                   | 1.01   | 0.58  | 1.76  | 0.8783                       | 1.04   | 0.65  | 1.65  | 0.6213                                    | 1.14   | 0.68  | 1.93  |
| CYP19A1 | rs730154        | 0.8502                            | 0.96   | 0.67  | 1.40  | 0.3950                                         | 1.20   | 0.79  | 1.80  | 0.5674                      | 0.85   | 0.50  | 1.47  | 0.9571                                   | 1.02   | 0.55  | 1.87  | 0.6471                       | 1.13   | 0.68  | 1.88  | 0.1954                                    | 1.45   | 0.83  | 2.53  |
| CYP19A1 | rs28566535      | 0.8994                            | 1.03   | 0.68  | 1.55  | 0.2310                                         | 1.31   | 0.84  | 2.02  | 0.9377                      | 0.98   | 0.53  | 1.79  | 0.3393                                   | 1.36   | 0.72  | 2.55  | 0.6371                       | 1.14   | 0.65  | 2.00  | 0.3420                                    | 1.34   | 0.73  | 2.47  |
| CYP19A1 | rs4774585       | 0.0753                            | 1.36   | 0.97  | 1.90  | 0.2886                                         | 1.24   | 0.84  | 1.83  | 0.7276                      | 1.09   | 0.66  | 1.80  | 0.6713                                   | 1.13   | 0.64  | 2.00  | 0.0284                       | 1.67   | 1.06  | 2.65  | 0.2587                                    | 1.37   | 0.80  | 2.35  |
| CYP19A1 | rs6493497       | 0.1277                            | 0.72   | 0.48  | 1.10  | 0.3676                                         | 0.81   | 0.51  | 1.29  | 0.0687                      | 0.55   | 0.28  | 1.05  | 0.1672                                   | 0.60   | 0.29  | 1.24  | 0.8092                       | 0.94   | 0.54  | 1.61  | 0.8475                                    | 1.06   | 0.58  | 1.94  |
| CYP19A1 | rs752760        | 0.8180                            | 1.04   | 0.72  | 1.52  | 0.7329                                         | 0.93   | 0.61  | 1.41  | 0.4481                      | 0.81   | 0.47  | 1.40  | 0.6509                                   | 0.86   | 0.46  | 1.63  | 0.2668                       | 1.33   | 0.80  | 2.22  | 0.9201                                    | 1.03   | 0.59  | 1.80  |
| EP300   | rs20551         | 0.9997                            | 1.00   | 0.72  | 1.38  | 0.8056                                         | 1.05   | 0.72  | 1.52  | 0.4175                      | 0.81   | 0.49  | 1.34  | 0.6758                                   | 0.89   | 0.50  | 1.56  | 0.5147                       | 1.15   | 0.75  | 1.78  | 0.5308                                    | 1.17   | 0.72  | 1.91  |
| ESR1    | CP-ESR1-01-ESR1 | 0.9923                            | 0.00   | 0.00  | Inf   | 0.9932                                         | 0.00   | 0.00  | Inf   | 0.9958                      | 0.00   | 0.00  | Inf   | 0.9963                                   | 0.00   | 0.00  | Inf   | 0.9957                       | 0.00   | 0.00  | Inf   | 0.9962                                    | 0.00   | 0.00  | Inf   |
| ESR1    | CP-ESR1-02-ESR1 | 0.6825                            | 1.23   | 0.46  | 3.32  | 0.3467                                         | 0.39   | 0.05  | 2.78  | 0.9174                      | 1.08   | 0.26  | 4.40  | 0.7005                                   | 0.68   | 0.09  | 4.91  | 0.5464                       | 1.54   | 0.38  | 6.27  | 0.9957                                    | 0.00   | 0.00  | Inf   |
| ESR1    | CP-ESR1-04-ESR1 | 0.7291                            | 0.71   | 0.10  | 5.05  | 0.9491                                         | 0.94   | 0.13  | 6.72  | 0.9262                      | 1.10   | 0.15  | 7.92  | 0.7052                                   | 1.47   | 0.20  | 10.62 | 0.9958                       | 0.00   | 0.00  | Inf   | 0.9963                                    | 0.00   | 0.00  | Inf   |
| ESR1    | rs11963577      | 0.3647                            | 2.48   | 0.35  | 17.76 | 0.2568                                         | 3.12   | 0.44  | 22.39 | 0.2947                      | 2.88   | 0.40  | 20.76 | 0.2037                                   | 3.61   | 0.50  | 26.19 | NA                           | 1.00   | 1.00  | 1.00  | NA                                        | 1.00   | 1.00  | 1.00  |
| ESR1    | rs867239        | 0.8169                            | 1.08   | 0.55  | 2.12  | 0.8104                                         | 1.10   | 0.51  | 2.36  | 0.4059                      | 1.43   | 0.62  | 3.30  | 0.3554                                   | 1.54   | 0.61  | 3.88  | 0.6996                       | 0.80   | 0.25  | 2.52  | 0.6137                                    | 0.70   | 0.17  | 2.85  |
| ESR1    | rs2077647       | 0.7761                            | 0.95   | 0.66  | 1.36  | 0.9256                                         | 0.98   | 0.65  | 1.48  | 0.9598                      | 0.99   | 0.57  | 1.71  | 0.7530                                   | 1.11   | 0.58  | 2.12  | 0.7811                       | 0.93   | 0.58  | 1.51  | 0.7327                                    | 0.91   | 0.53  | 1.56  |
| ESR1    | rs6920483       | 0.6703                            | 1.18   | 0.55  | 2.52  | 0.8201                                         | 1.11   | 0.45  | 2.72  | 0.3098                      | 1.69   | 0.61  | 4.65  | 0.3963                                   | 1.66   | 0.52  | 5.33  | 0.7529                       | 0.83   | 0.26  | 2.64  | 0.6666                                    | 0.73   | 0.18  | 3.01  |
| ESR1    | rs3778610       | 0.6408                            | 1.27   | 0.47  | 3.43  | 0.6590                                         | 1.30   | 0.41  | 4.09  | 0.0867                      | 2.43   | 0.88  | 6.69  | 0.1294                                   | 2.47   | 0.77  | 7.97  | 0.9950                       | 0.00   | 0.00  | Inf   | 0.9957                                    | 0.00   | 0.00  | Inf   |
| ESR1    | rs3853250       | 0.4759                            | 0.88   | 0.61  | 1.26  | 0.4674                                         | 0.86   | 0.57  | 1.30  | 0.7155                      | 0.90   | 0.50  | 1.60  | 0.6106                                   | 0.84   | 0.44  | 1.62  | 0.6839                       | 0.91   | 0.57  | 1.45  | 0.7363                                    | 0.91   | 0.53  | 1.56  |
| ESR1    | rs4870056       | 0.6163                            | 0.91   | 0.62  | 1.32  | 0.5276                                         | 0.87   | 0.57  | 1.34  | 0.8273                      | 0.94   | 0.52  | 1.69  | 0.7667                                   | 0.90   | 0.46  | 1.77  | 0.7633                       | 0.93   | 0.57  | 1.52  | 0.6641                                    | 0.88   | 0.51  | 1.55  |
| ESR1    | rs9322331       | 0.9879                            | 1.00   | 0.72  | 1.38  | 0.9617                                         | 0.99   | 0.69  | 1.43  | 0.8655                      | 0.96   | 0.59  | 1.55  | 0.5728                                   | 0.86   | 0.50  | 1.47  | 0.8096                       | 1.05   | 0.68  | 1.62  | 0.5966                                    | 1.14   | 0.70  | 1.87  |
| ESR1    | rs2234693       | 0.6472                            | 0.92   | 0.63  | 1.34  | 0.7714                                         | 0.94   | 0.61  | 1.45  | 0.7711                      | 0.92   | 0.52  | 1.62  | 0.6347                                   | 0.86   | 0.46  | 1.61  | 0.8232                       | 0.94   | 0.57  | 1.57  | 0.8853                                    | 1.04   | 0.58  | 1.90  |
| ESR1    | rs9340799       | 0.7795                            | 1.05   | 0.74  | 1.49  | 0.7712                                         | 1.06   | 0.71  | 1.58  | 0.5873                      | 1.16   | 0.68  | 1.97  | 0.8125                                   | 1.08   | 0.59  | 1.96  | 0.9620                       | 1.01   | 0.64  | 1.61  | 0.7637                                    | 1.09   | 0.63  | 1.86  |
| ESR1    | rs9340817       | 0.3691                            | 0.69   | 0.30  | 1.56  | 0.5241                                         | 0.75   | 0.30  | 1.83  | 0.7230                      | 0.83   | 0.30  | 2.29  | 0.8759                                   | 1.08   | 0.39  | 3.02  | 0.4144                       | 0.56   | 0.14  | 2.27  | 0.3168                                    | 0.36   | 0.05  | 2.63  |
| ESR1    | rs1709181       | 0.0370                            | 0.68   | 0.47  | 0.98  | 0.0318                                         | 0.64   | 0.42  | 0.96  | 0.0972                      | 0.63   | 0.37  | 1.09  | 0.0193                                   | 0.49   | 0.27  | 0.89  | 0.1985                       | 0.73   | 0.45  | 1.18  | 0.4455                                    | 0.80   | 0.45  | 1.42  |
| ESR1    | rs1709182       | 0.0502                            | 0.71   | 0.51  | 1.00  | 0.0474                                         | 0.68   | 0.46  | 1.00  | 0.0127                      | 0.53   | 0.32  | 0.87  | 0.00                                     |        |       |       |                              |        |       |       |                                           |        |       |       |

|      |            |        |       |      |       |        |      |      |      |        |      |      |       |        |      |      |       |        |      |      |       |        |      |      |       |
|------|------------|--------|-------|------|-------|--------|------|------|------|--------|------|------|-------|--------|------|------|-------|--------|------|------|-------|--------|------|------|-------|
| ESR1 | rs4986934  | 0.3796 | 1.29  | 0.73 | 2.28  | 0.4374 | 1.29 | 0.68 | 2.47 | 0.7954 | 0.89 | 0.36 | 2.21  | 0.7426 | 1.17 | 0.46 | 2.93  | 0.0860 | 1.90 | 0.91 | 3.94  | 0.3544 | 1.54 | 0.62 | 3.85  |
| ESR1 | rs4870061  | 0.0952 | 1.32  | 0.95 | 1.83  | 0.0718 | 1.41 | 0.97 | 2.04 | 0.1519 | 1.43 | 0.88 | 2.34  | 0.1051 | 1.59 | 0.91 | 2.78  | 0.2478 | 1.30 | 0.83 | 2.03  | 0.2515 | 1.34 | 0.81 | 2.23  |
| ESR1 | rs2347868  | 0.0995 | 1.32  | 0.95 | 1.82  | 0.0622 | 1.42 | 0.98 | 2.07 | 0.3386 | 1.27 | 0.78 | 2.05  | 0.2332 | 1.40 | 0.81 | 2.42  | 0.1040 | 1.45 | 0.93 | 2.26  | 0.0939 | 1.54 | 0.93 | 2.57  |
| ESR1 | rs3020410  | 0.5767 | 0.91  | 0.64 | 1.28  | 0.3025 | 0.81 | 0.54 | 1.21 | 0.4264 | 0.81 | 0.49 | 1.36  | 0.4132 | 0.78 | 0.44 | 1.41  | 0.8600 | 1.04 | 0.65 | 1.68  | 0.6295 | 0.87 | 0.49 | 1.53  |
| ESR1 | rs3003917  | 0.2738 | 1.21  | 0.86 | 1.69  | 0.2243 | 1.27 | 0.86 | 1.87 | 0.4006 | 1.24 | 0.75 | 2.03  | 0.4439 | 1.25 | 0.71 | 2.20  | 0.4143 | 1.21 | 0.77 | 1.91  | 0.2960 | 1.32 | 0.78 | 2.24  |
| ESR1 | rs6909026  | 0.3338 | 1.40  | 0.71 | 2.74  | 0.1746 | 1.65 | 0.80 | 3.39 | 0.1277 | 1.92 | 0.83 | 4.45  | 0.0313 | 2.55 | 1.09 | 5.99  | 0.9178 | 0.94 | 0.30 | 2.99  | 0.7974 | 0.83 | 0.20 | 3.41  |
| ESR1 | rs3020377  | 0.3156 | 1.19  | 0.85 | 1.66  | 0.1523 | 1.33 | 0.90 | 1.96 | 0.6006 | 1.15 | 0.69 | 1.91  | 0.2984 | 1.37 | 0.75 | 2.51  | 0.2918 | 1.27 | 0.81 | 1.99  | 0.2488 | 1.35 | 0.81 | 2.26  |
| ESR1 | rs9322348  | 0.0581 | 2.62  | 0.97 | 7.07  | 0.0933 | 2.67 | 0.85 | 8.43 | 0.9539 | 1.06 | 0.15 | 7.64  | 0.7481 | 1.38 | 0.19 | 10.01 | 0.0032 | 5.85 | 1.81 | 18.89 | 0.0156 | 5.87 | 1.40 | 24.66 |
| ESR1 | rs2347869  | 0.5229 | 1.12  | 0.79 | 1.58  | 0.3476 | 1.21 | 0.81 | 1.81 | 0.3437 | 1.30 | 0.76 | 2.23  | 0.4222 | 1.29 | 0.70 | 2.38  | 0.9106 | 1.03 | 0.65 | 1.61  | 0.5334 | 1.18 | 0.70 | 2.02  |
| ESR1 | rs1884049  | 0.2812 | 1.19  | 0.86 | 1.65  | 0.1654 | 1.30 | 0.90 | 1.88 | 0.1273 | 1.47 | 0.90 | 2.39  | 0.1013 | 1.59 | 0.91 | 2.79  | 0.7109 | 1.09 | 0.70 | 1.69  | 0.5323 | 1.17 | 0.71 | 1.95  |
| ESR1 | rs9340941  | 0.7927 | 0.93  | 0.52 | 1.64  | 0.5590 | 0.82 | 0.41 | 1.61 | 0.9875 | 0.99 | 0.43 | 2.31  | 0.7225 | 0.83 | 0.30 | 2.31  | 0.7241 | 0.87 | 0.40 | 1.89  | 0.6424 | 0.80 | 0.32 | 2.01  |
| ESR1 | rs9340958  | 0.6048 | 0.88  | 0.54 | 1.44  | 0.8728 | 0.96 | 0.55 | 1.65 | 0.5918 | 1.20 | 0.61 | 2.36  | 0.5930 | 1.23 | 0.58 | 2.62  | 0.2430 | 0.65 | 0.31 | 1.34  | 0.4765 | 0.75 | 0.34 | 1.65  |
| ESR1 | rs2982734  | 0.6393 | 0.92  | 0.66 | 1.29  | 0.4260 | 1.17 | 0.79 | 1.73 | 0.5357 | 1.17 | 0.71 | 1.92  | 0.5046 | 1.21 | 0.69 | 2.13  | 0.2081 | 0.75 | 0.48 | 1.17  | 0.6608 | 1.13 | 0.66 | 1.94  |
| ESR1 | rs9341004  | 0.1525 | 1.32  | 0.90 | 1.93  | 0.0229 | 1.62 | 1.07 | 2.45 | 0.1143 | 1.56 | 0.90 | 2.71  | 0.1695 | 1.56 | 0.83 | 2.92  | 0.6082 | 1.15 | 0.68 | 1.94  | 0.0696 | 1.67 | 0.96 | 2.90  |
| ESR1 | rs3020368  | 0.9466 | 1.01  | 0.66 | 1.56  | 0.4042 | 1.22 | 0.76 | 1.95 | 0.9444 | 1.02 | 0.53 | 1.96  | 0.7977 | 1.10 | 0.53 | 2.26  | 0.9991 | 1.00 | 0.56 | 1.78  | 0.3929 | 1.31 | 0.71 | 2.42  |
| ESR1 | rs6930355  | 0.5617 | 0.90  | 0.62 | 1.30  | 0.6143 | 1.11 | 0.74 | 1.66 | 0.9331 | 1.02 | 0.59 | 1.78  | 1.0000 | 1.00 | 0.53 | 1.88  | 0.3861 | 0.80 | 0.49 | 1.32  | 0.5348 | 1.18 | 0.70 | 1.99  |
| ESR1 | rs3798565  | 0.0872 | 0.55  | 0.28 | 1.09  | 0.2323 | 0.64 | 0.31 | 1.32 | 0.0730 | 0.40 | 0.14 | 1.09  | 0.2077 | 0.52 | 0.19 | 1.44  | 0.8656 | 0.92 | 0.37 | 2.29  | 0.9589 | 0.97 | 0.35 | 2.69  |
| ESR1 | rs3020371  | 0.5522 | 0.91  | 0.65 | 1.25  | 0.5879 | 1.11 | 0.76 | 1.62 | 0.7893 | 1.07 | 0.65 | 1.75  | 0.8378 | 1.06 | 0.61 | 1.85  | 0.2672 | 0.78 | 0.50 | 1.21  | 0.6264 | 1.14 | 0.68 | 1.91  |
| ESR1 | rs9479188  | 0.8785 | 1.03  | 0.73 | 1.45  | 0.2616 | 1.25 | 0.85 | 1.83 | 0.4622 | 1.21 | 0.73 | 2.02  | 0.5169 | 1.21 | 0.68 | 2.16  | 0.6415 | 0.89 | 0.55 | 1.44  | 0.3690 | 1.27 | 0.76 | 2.12  |
| ESR1 | rs3020376  | 0.9501 | 0.98  | 0.61 | 1.60  | 0.7086 | 1.11 | 0.65 | 1.88 | 0.5240 | 1.24 | 0.65 | 2.36  | 0.6870 | 1.17 | 0.55 | 2.49  | 0.5291 | 0.79 | 0.38 | 1.64  | 0.8518 | 1.07 | 0.51 | 2.27  |
| ESR1 | rs750686   | 0.4720 | 0.89  | 0.64 | 1.23  | 0.7648 | 1.06 | 0.72 | 1.55 | 0.9006 | 1.03 | 0.63 | 1.70  | 0.9097 | 1.03 | 0.59 | 1.82  | 0.2655 | 0.78 | 0.50 | 1.21  | 0.7881 | 1.07 | 0.64 | 1.81  |
| ESR1 | rs9341066  | 0.7340 | 1.09  | 0.68 | 1.74  | 0.5630 | 1.17 | 0.69 | 1.99 | 0.6325 | 0.83 | 0.40 | 1.76  | 0.6509 | 0.82 | 0.35 | 1.94  | 0.2403 | 1.45 | 0.78 | 2.67  | 0.1438 | 1.66 | 0.84 | 3.28  |
| ESR1 | rs2228480  | 0.0428 | 0.69  | 0.49 | 0.99  | 0.0490 | 0.67 | 0.44 | 1.00 | 0.0456 | 0.58 | 0.34 | 0.99  | 0.0212 | 0.47 | 0.25 | 0.89  | 0.3699 | 0.81 | 0.51 | 1.29  | 0.6147 | 0.87 | 0.52 | 1.48  |
| ESR1 | rs9341070  | 0.9461 | 1.05  | 0.26 | 4.24  | 0.7013 | 0.68 | 0.09 | 4.87 | 0.8643 | 0.84 | 0.12 | 6.07  | 0.9416 | 1.08 | 0.15 | 7.79  | 0.6503 | 1.58 | 0.22 | 11.35 | 0.9955 | 0.00 | 0.00 | Inf   |
| ESR1 | rs3798577  | 0.2151 | 1.26  | 0.88 | 1.80  | 0.1452 | 1.37 | 0.90 | 2.08 | 0.9168 | 1.03 | 0.60 | 1.77  | 0.6923 | 1.14 | 0.61 | 2.13  | 0.0935 | 1.52 | 0.93 | 2.47  | 0.0885 | 1.64 | 0.93 | 2.88  |
| ESR1 | rs9341072  | 0.0208 | 10.41 | 1.43 | 75.88 | 0.9944 | 0.00 | 0.00 | Inf  | NA     | 1.00 | 1.00 | 1.00  | NA     | 1.00 | 1.00 | 1.00  | 0.0304 | 9.19 | 1.23 | 68.48 | 0.9960 | 0.00 | 0.00 | Inf   |
| ESR1 | rs3798758  | 0.7035 | 1.13  | 0.60 | 2.15  | 0.6525 | 1.18 | 0.57 | 2.42 | 0.6589 | 1.21 | 0.52 | 2.80  | 0.5814 | 1.30 | 0.52 | 3.26  | 0.7620 | 1.17 | 0.43 | 3.19  | 0.8119 | 1.15 | 0.36 | 3.67  |
| ESR1 | rs2747648  | 0.2157 | 0.60  | 0.26 | 1.35  | 0.1010 | 0.38 | 0.12 | 1.21 | 0.7564 | 0.83 | 0.26 | 2.65  | 0.6344 | 0.71 | 0.17 | 2.92  | 0.1642 | 0.44 | 0.14 | 1.40  | 0.0991 | 0.19 | 0.03 | 1.37  |
| ESR1 | rs9341077  | 0.0295 | 0.40  | 0.18 | 0.91  | 0.0354 | 0.34 | 0.13 | 0.93 | 0.1357 | 0.34 | 0.08 | 1.40  | 0.1294 | 0.22 | 0.03 | 1.56  | 0.0974 | 0.43 | 0.16 | 1.17  | 0.1339 | 0.41 | 0.13 | 1.31  |
| ESR1 | rs1062577  | 0.2084 | 0.72  | 0.44 | 1.20  | 0.2485 | 0.71 | 0.40 | 1.27 | 0.4516 | 0.75 | 0.36 | 1.58  | 0.4532 | 0.72 | 0.31 | 1.69  | 0.3202 | 0.70 | 0.35 | 1.41  | 0.3898 | 0.71 | 0.32 | 1.56  |
| ESR1 | rs2813543  | 0.6687 | 0.93  | 0.67 | 1.29  | 0.2573 | 0.80 | 0.55 | 1.17 | 0.8264 | 0.95 | 0.58 | 1.54  | 0.6234 | 0.87 | 0.50 | 1.52  | 0.6666 | 0.91 | 0.59 | 1.40  | 0.2616 | 0.75 | 0.45 | 1.24  |
| ESR1 | rs926848   | 0.9394 | 0.98  | 0.53 | 1.81  | 0.9110 | 1.04 | 0.53 | 2.06 | 0.5547 | 0.76 | 0.30 | 1.89  | 0.6497 | 0.79 | 0.28 | 2.19  | 0.4277 | 1.40 | 0.61 | 3.22  | 0.3659 | 1.53 | 0.61 | 3.81  |
| ESR2 | IU08-E2-01 | 0.8341 | 0.81  | 0.11 | 5.79  | 0.9560 | 1.06 | 0.15 | 7.57 | 0.6753 | 1.53 | 0.21 | 11.00 | 0.4964 | 1.99 | 0.27 | 14.41 | 0.9952 | 0.00 | 0.00 | Inf   | 0.9958 | 0.00 | 0.00 | Inf   |
| ESR2 | IU08-E2-02 | 0.8463 | 0.95  | 0.60 | 1.53  | 0.7857 | 0.93 | 0.54 | 1.60 | 0.9843 | 1.01 | 0.51 | 1.97  | 0.6253 | 1.20 | 0.58 | 2.46  | 0.8546 | 0.94 | 0.48 | 1.82  | 0.4450 | 0.72 | 0.31 | 1.67  |
| ESR2 | rs8006145  | 0.6100 | 1.09  | 0.79 | 1.50  | 0.9328 | 1.02 | 0.70 | 1.47 | 0.7130 | 0.91 | 0.57 | 1.48  | 0.7230 | 0.91 | 0.53 | 1.56  | 0.2170 | 1.31 | 0.85 | 2.03  | 0.5275 | 1.17 | 0.71 | 1.93  |
| ESR2 | rs4986938  | 0.6383 | 1.08  | 0.78 | 1.50  | 0.7243 | 0.94 | 0.65 | 1.35 | 0.5577 | 0.87 | 0.53 | 1.40  | 0.2181 | 0.71 | 0.41 | 1.22  | 0.1871 | 1.35 | 0.87 | 2.09  | 0.4280 | 1.22 | 0.74 | 2.02  |
| ESR2 | rs1256064  | 0.8990 | 1.05  | 0.51 | 2.14  | 0.6301 | 1.21 | 0.56 | 2.59 | 0.0806 | 2.46 | 0.90 | 6.77  | 0.1368 | 2.42 | 0.76 | 7.78  | 0.3119 | 0.60 | 0.22 | 1.63  | 0.6505 | 0.79 | 0.29 | 2.18  |
| ESR2 | rs867443   | 0.4950 | 1.12  | 0.81 | 1.55  | 0.8127 | 1.05 | 0.72 | 1.51 | 0.5184 | 0.85 | 0.52 | 1.38  | 0.4346 | 0.80 | 0.46 | 1.40  | 0.0876 | 1.46 | 0.95 | 2.26  | 0.2234 | 1.36 | 0.83 | 2.23  |
| ESR2 | rs944045   | 0.6414 | 1.11  | 0.72 | 1.69  | 0.8816 | 1.04 | 0.63 | 1.70 | 0.1708 | 1.51 | 0.84 | 2.72  | 0.3688 | 1.37 | 0.69 | 2.73  | 0.5091 | 0.81 | 0.44 | 1.50  | 0.5126 | 0.79 | 0.39 | 1.60  |
| ESR2 | rs944460   | 0.0777 | 0.50  | 0.24 | 1.08  | 0.1805 | 0.57 | 0.25 | 1.30 | 0.1583 | 0.43 | 0.14 | 1.38  | 0.3475 | 0.57 | 0.18 | 1.84  | 0.2924 | 0.58 | 0.21 | 1.60  | 0.3506 | 0.57 | 0.18 | 1.84  |
| ESR2 | rs1256062  | 0.2123 | 0.79  | 0.54 | 1.15  | 0.1988 | 0.75 | 0.49 | 1.16 | 0.8212 | 0.94 | 0.53 | 1.64  | 0.7434 | 0.90 | 0.47 | 1.71  | 0.1201 | 0.67 | 0.40 | 1.11  | 0.1324 | 0.63 | 0.35 | 1.15  |
| ESR2 | rs1256059  | 0.5829 | 1.10  | 0.78 | 1.56  | 0.5337 | 1.13 | 0.76 | 1.69 | 0.9792 | 1.01 | 0.61 | 1.66  | 0.8502 | 1.06 | 0.60 | 1.88  | 0.5431 | 1.16 | 0.72 | 1.88  | 0.5679 | 1.18 | 0.68 | 2.05  |
| ESR2 | rs1952585  | 0.5702 | 1.27  | 0.56 | 2.87  | 0.4724 | 1.39 | 0.57 | 3.41 | 0.0182 | 3.39 | 1.23 | 9.35  | 0.0394 | 3.42 | 1.06 | 11.00 | 0.3365 | 0.50 | 0.12 | 2.05  | 0.5580 | 0.66 | 0.16 | 2.69  |
| ESR2 | rs17766755 | 0.8281 | 1.04  | 0.74 | 1.45  | 0.5326 | 0.89 | 0.61 | 1.29 | 0.9349 | 0.98 | 0.60 | 1.61  | 0.4510 | 0.81 | 0.46 | 1.41  | 0.5989 | 1.13 | 0.72 | 1.77  | 0.9942 | 1.00 | 0.60 | 1.66  |
| ESR2 | rs2274705  | 0.4296 | 1.18  | 0.79 | 1.76  | 0.5841 | 1.14 | 0.71 | 1.82 | 0.1911 | 1.46 | 0.83 | 2.58  | 0.3412 | 1.37 | 0.72 | 2.63  | 0.7905 | 0.93 | 0.52 | 1.64  | 0.8032 | 0.92 | 0.47 | 1.79  |
| ESR2 | rs10140457 | 0.2862 | 0.64  | 0.28 | 1.45  | 0.4239 | 0.69 | 0.28 | 1.70 | 0.9312 | 0.95 | 0.30 | 3.03  | 0.7756 | 0.81 | 0.20 | 3.35  | 0.1752 | 0.45 | 0.14 | 1.43  | 0.3734 | 0.59 | 0.19 | 1.88  |
| ESR2 | rs1256049  | 0.5191 | 0.81  | 0.43 | 1.54  | 0.9076 | 0.96 | 0.49 | 1.90 | 0.4095 | 0.65 | 0.24 | 1.80  | 0.7681 | 0.86 | 0.31 | 2.38  | 0.9935 | 1.00 | 0.43 | 2.29  | 0.8454 | 1.10 | 0.44 | 2.73  |
| ESR2 | rs8003490  | 0.7656 | 1.07  | 0.68 | 1.67  | 0.6886 | 0.89 | 0.52 | 1.54 | 0.2533 | 1.44 | 0.77 | 2.70  | 0.6091 | 1.22 | 0.57 | 2.60  | 0.5107 | 0.81 | 0.43 | 1.53  | 0.3073 | 0.66 | 0.30 | 1.46  |
| ESR2 | rs1256031  | 0.9081 | 0.98  | 0.68 | 1.40  | 0.9596 | 0.99 | 0.66 | 1.49 | 0.8701 | 1.05 | 0.61 | 1.78  | 0.8381 | 1.07 | 0.58 | 1.97  |        |      |      |       |        |      |      |       |

|       |            |        |      |      |      |        |      |      |      |        |      |      |      |        |      |      |      |        |      |      |      |        |      |      |      |
|-------|------------|--------|------|------|------|--------|------|------|------|--------|------|------|------|--------|------|------|------|--------|------|------|------|--------|------|------|------|
| HCRT2 | rs2653349  | 0.8867 | 0.98 | 0.69 | 1.38 | 0.7513 | 0.94 | 0.63 | 1.40 | 0.5254 | 1.18 | 0.71 | 1.94 | 0.6999 | 1.12 | 0.63 | 1.99 | 0.4911 | 0.84 | 0.52 | 1.37 | 0.4731 | 0.82 | 0.47 | 1.42 |
| HTR1A | rs1800046  | 0.9941 | 0.00 | 0.00 | Inf  | 0.9948 | 0.00 | 0.00 | Inf  | 0.9965 | 0.00 | 0.00 | Inf  | 0.9968 | 0.00 | 0.00 | Inf  | 0.9952 | 0.00 | 0.00 | Inf  | 0.9958 | 0.00 | 0.00 | Inf  |
| HTR1A | rs62295    | 0.3042 | 1.22 | 0.83 | 1.80 | 0.2422 | 1.30 | 0.84 | 2.04 | 0.5636 | 1.19 | 0.66 | 2.15 | 0.4379 | 1.31 | 0.66 | 2.63 | 0.3057 | 1.30 | 0.78 | 2.17 | 0.3076 | 1.36 | 0.76 | 2.43 |
| HTR2A | rs6308     | 0.8729 | 0.85 | 0.12 | 6.09 | 0.9284 | 1.09 | 0.15 | 7.84 | 0.9966 | 0.00 | 0.00 | Inf  | 0.9970 | 0.00 | 0.00 | Inf  | 0.9748 | 1.03 | 0.14 | 7.42 | 0.7761 | 1.33 | 0.18 | 9.62 |
| HTR2A | rs7997012  | 0.0126 | 0.66 | 0.48 | 0.92 | 0.0121 | 0.63 | 0.43 | 0.90 | 0.2940 | 0.77 | 0.48 | 1.25 | 0.3927 | 0.79 | 0.46 | 1.36 | 0.0162 | 0.59 | 0.38 | 0.91 | 0.0092 | 0.51 | 0.31 | 0.85 |
| HTR2A | rs3742278  | 0.8855 | 1.03 | 0.70 | 1.50 | 0.6233 | 0.89 | 0.57 | 1.40 | 0.6682 | 0.88 | 0.49 | 1.59 | 0.3361 | 0.70 | 0.34 | 1.44 | 0.5105 | 1.18 | 0.72 | 1.93 | 0.7817 | 1.09 | 0.61 | 1.94 |
| HTR2A | rs2296972  | 0.0337 | 0.71 | 0.51 | 0.97 | 0.1181 | 0.75 | 0.52 | 1.08 | 0.8570 | 0.96 | 0.58 | 1.56 | 0.9184 | 0.97 | 0.55 | 1.70 | 0.0129 | 0.57 | 0.37 | 0.89 | 0.0631 | 0.62 | 0.38 | 1.03 |
| HTR2A | rs2274639  | 0.8597 | 0.97 | 0.66 | 1.41 | 0.7025 | 1.08 | 0.71 | 1.65 | 0.9828 | 0.99 | 0.57 | 1.72 | 0.5874 | 1.18 | 0.65 | 2.15 | 0.8427 | 0.95 | 0.57 | 1.59 | 0.9734 | 1.01 | 0.56 | 1.81 |
| HTR2A | rs731779   | 0.5625 | 1.11 | 0.79 | 1.55 | 0.1794 | 1.30 | 0.89 | 1.90 | 0.3351 | 1.29 | 0.77 | 2.14 | 0.0398 | 1.79 | 1.03 | 3.11 | 0.7717 | 0.93 | 0.59 | 1.47 | 0.8411 | 0.95 | 0.56 | 1.60 |
| HTR2A | rs9567746  | 0.4634 | 1.14 | 0.81 | 1.59 | 0.1625 | 1.31 | 0.90 | 1.91 | 0.4305 | 1.23 | 0.74 | 2.04 | 0.0585 | 1.71 | 0.98 | 2.97 | 0.9025 | 1.03 | 0.65 | 1.62 | 0.9610 | 1.01 | 0.60 | 1.70 |
| HTR2A | rs594242   | 0.2410 | 0.81 | 0.57 | 1.15 | 0.1561 | 0.74 | 0.49 | 1.12 | 0.6299 | 1.13 | 0.68 | 1.88 | 0.8516 | 1.06 | 0.59 | 1.89 | 0.0389 | 0.59 | 0.36 | 0.97 | 0.0339 | 0.53 | 0.30 | 0.95 |
| HTR2A | rs6313     | 0.9318 | 0.98 | 0.70 | 1.40 | 0.6728 | 1.09 | 0.73 | 1.64 | 0.2615 | 0.75 | 0.45 | 1.24 | 0.1802 | 0.68 | 0.39 | 1.20 | 0.3368 | 1.27 | 0.78 | 2.06 | 0.0706 | 1.73 | 0.95 | 3.15 |
| HTR2A | rs1805055  | 0.2570 | 0.71 | 0.39 | 1.28 | 0.2734 | 0.68 | 0.35 | 1.35 | 0.6173 | 0.83 | 0.40 | 1.73 | 0.8642 | 0.93 | 0.42 | 2.07 | 0.4142 | 0.66 | 0.24 | 1.80 | 0.2278 | 0.42 | 0.10 | 1.72 |
| HTR2A | rs6306     | 0.7547 | 1.08 | 0.68 | 1.71 | 0.5997 | 1.15 | 0.69 | 1.92 | 0.8529 | 1.07 | 0.51 | 2.24 | 0.3453 | 1.44 | 0.68 | 3.05 | 0.9265 | 1.03 | 0.57 | 1.86 | 0.8207 | 0.92 | 0.45 | 1.87 |
| HTR2A | rs6311     | 0.6815 | 0.93 | 0.66 | 1.31 | 0.8501 | 1.04 | 0.70 | 1.55 | 0.2620 | 0.75 | 0.45 | 1.24 | 0.1724 | 0.67 | 0.38 | 1.19 | 0.6041 | 1.13 | 0.71 | 1.80 | 0.1332 | 1.55 | 0.88 | 2.73 |
| HTR2A | rs1328685  | 0.5933 | 1.11 | 0.75 | 1.66 | 0.5039 | 0.85 | 0.52 | 1.38 | 0.6087 | 0.85 | 0.45 | 1.59 | 0.2219 | 0.61 | 0.27 | 1.35 | 0.1927 | 1.41 | 0.84 | 2.35 | 0.7422 | 1.11 | 0.59 | 2.09 |
| NCOA1 | rs920418   | 0.4705 | 0.88 | 0.63 | 1.24 | 0.4815 | 0.87 | 0.59 | 1.28 | 0.7717 | 1.08 | 0.63 | 1.85 | 0.8515 | 0.94 | 0.52 | 1.72 | 0.2049 | 0.75 | 0.48 | 1.17 | 0.4074 | 0.80 | 0.48 | 1.35 |
| NCOA1 | rs2033861  | 0.8625 | 1.03 | 0.70 | 1.53 | 0.4319 | 0.84 | 0.55 | 1.30 | 0.4963 | 1.23 | 0.68 | 2.25 | 0.8881 | 1.05 | 0.54 | 2.04 | 0.7501 | 0.92 | 0.55 | 1.54 | 0.2553 | 0.71 | 0.40 | 1.27 |
| NCOA1 | rs11125744 | 0.1367 | 0.73 | 0.49 | 1.10 | 0.7611 | 0.93 | 0.61 | 1.44 | 0.5219 | 0.81 | 0.43 | 1.53 | 0.6920 | 1.14 | 0.59 | 2.19 | 0.1169 | 0.65 | 0.38 | 1.11 | 0.3770 | 0.77 | 0.43 | 1.38 |
| NCOA1 | rs3731628  | 0.5997 | 1.13 | 0.71 | 1.79 | 0.4682 | 1.21 | 0.72 | 2.03 | 0.9548 | 0.98 | 0.49 | 1.98 | 0.9665 | 0.98 | 0.44 | 2.18 | 0.3492 | 1.34 | 0.73 | 2.47 | 0.2308 | 1.51 | 0.77 | 2.97 |
| NCOA1 | rs2083389  | 0.4731 | 1.13 | 0.81 | 1.59 | 0.7775 | 0.94 | 0.64 | 1.40 | 0.8119 | 1.06 | 0.64 | 1.77 | 0.1634 | 0.65 | 0.35 | 1.19 | 0.4824 | 1.18 | 0.74 | 1.87 | 0.3968 | 1.26 | 0.74 | 2.13 |
| NCOA1 | rs1804645  | 0.9019 | 0.96 | 0.53 | 1.74 | 0.8647 | 1.06 | 0.55 | 2.02 | 0.3162 | 0.55 | 0.17 | 1.76 | 0.5932 | 0.73 | 0.23 | 2.34 | 0.4912 | 1.27 | 0.64 | 2.55 | 0.5092 | 1.30 | 0.59 | 2.86 |
| NCOA1 | rs17737058 | 0.7852 | 1.05 | 0.75 | 1.46 | 0.3952 | 0.85 | 0.58 | 1.24 | 0.8999 | 1.03 | 0.63 | 1.70 | 0.1358 | 0.63 | 0.34 | 1.16 | 0.8481 | 1.04 | 0.67 | 1.62 | 0.8956 | 1.03 | 0.63 | 1.71 |
| NCOA2 | rs3088092  | 0.9041 | 0.97 | 0.57 | 1.65 | 0.9896 | 1.00 | 0.55 | 1.83 | 0.7684 | 0.89 | 0.40 | 1.95 | 0.9894 | 1.01 | 0.43 | 2.37 | 0.7476 | 1.13 | 0.54 | 2.34 | 0.8565 | 1.08 | 0.47 | 2.51 |
| NCOA2 | rs2228591  | 0.8631 | 1.05 | 0.61 | 1.82 | 0.2158 | 1.42 | 0.81 | 2.49 | 0.5322 | 0.72 | 0.26 | 1.99 | 0.9229 | 0.95 | 0.34 | 2.64 | 0.4934 | 1.26 | 0.65 | 2.44 | 0.1033 | 1.75 | 0.89 | 3.45 |
| NCOA2 | rs2272670  | 0.8428 | 0.97 | 0.69 | 1.35 | 0.7314 | 1.07 | 0.73 | 1.56 | 0.5294 | 1.17 | 0.71 | 1.92 | 0.7008 | 1.12 | 0.64 | 1.96 | 0.3970 | 0.82 | 0.52 | 1.30 | 0.9211 | 1.03 | 0.61 | 1.71 |
| NCOA2 | rs4738079  | 0.5174 | 0.86 | 0.54 | 1.37 | 0.4565 | 0.81 | 0.47 | 1.41 | 0.3647 | 1.34 | 0.71 | 2.52 | 0.7049 | 1.16 | 0.54 | 2.49 | 0.1064 | 0.56 | 0.28 | 1.13 | 0.1906 | 0.59 | 0.27 | 1.30 |
| NCOA2 | rs1380896  | 0.8178 | 0.96 | 0.66 | 1.38 | 0.6653 | 1.10 | 0.72 | 1.67 | 0.2614 | 1.36 | 0.80 | 2.32 | 0.4402 | 1.28 | 0.69 | 2.37 | 0.1736 | 0.70 | 0.42 | 1.17 | 0.8576 | 0.95 | 0.54 | 1.68 |
| NCOA3 | rs6094752  | 0.5288 | 0.84 | 0.49 | 1.44 | 0.6754 | 0.88 | 0.48 | 1.60 | 0.9825 | 0.99 | 0.49 | 2.01 | 0.9872 | 1.01 | 0.45 | 2.24 | 0.4629 | 0.73 | 0.32 | 1.68 | 0.6268 | 0.80 | 0.32 | 1.99 |
| NCOA3 | rs2230782  | 0.9185 | 0.98 | 0.60 | 1.58 | 0.7855 | 1.08 | 0.63 | 1.83 | 0.7616 | 1.13 | 0.51 | 2.48 | 0.5758 | 1.28 | 0.54 | 3.00 | 0.5586 | 0.83 | 0.45 | 1.54 | 0.7698 | 0.90 | 0.46 | 1.78 |
| NCOA3 | rs2076546  | 0.3112 | 0.80 | 0.52 | 1.23 | 0.4973 | 0.85 | 0.52 | 1.37 | 0.1591 | 0.57 | 0.26 | 1.25 | 0.0863 | 0.41 | 0.15 | 1.14 | 0.7633 | 0.92 | 0.55 | 1.55 | 0.6671 | 1.13 | 0.64 | 1.99 |
| NCOA3 | rs365602   | 0.1762 | 0.72 | 0.45 | 1.16 | 0.1193 | 0.64 | 0.37 | 1.12 | 0.0495 | 0.45 | 0.20 | 1.00 | 0.0488 | 0.39 | 0.15 | 1.00 | 0.8559 | 1.06 | 0.59 | 1.90 | 0.9362 | 0.97 | 0.49 | 1.94 |
| NCOA3 | rs396221   | 0.6952 | 0.93 | 0.65 | 1.33 | 0.8707 | 0.97 | 0.64 | 1.47 | 0.2266 | 0.73 | 0.44 | 1.21 | 0.1039 | 0.62 | 0.35 | 1.10 | 0.7162 | 1.10 | 0.65 | 1.89 | 0.2428 | 1.50 | 0.76 | 2.96 |
| NCOR1 | rs1065822  | 0.8981 | 0.98 | 0.69 | 1.39 | 0.8660 | 0.97 | 0.65 | 1.44 | 0.1360 | 0.67 | 0.40 | 1.13 | 0.5718 | 0.84 | 0.45 | 1.55 | 0.1981 | 1.37 | 0.85 | 2.22 | 0.6470 | 1.13 | 0.67 | 1.92 |
| NCOR1 | rs1073093  | 0.4142 | 0.74 | 0.36 | 1.52 | 0.2492 | 0.59 | 0.24 | 1.45 | 0.4407 | 0.63 | 0.20 | 2.02 | 0.3976 | 0.54 | 0.13 | 2.23 | 0.6827 | 0.83 | 0.34 | 2.05 | 0.4281 | 0.63 | 0.20 | 1.99 |
| NCOR1 | rs61753150 | 0.1385 | 0.35 | 0.09 | 1.41 | 0.1395 | 0.23 | 0.03 | 1.62 | 0.4045 | 0.43 | 0.06 | 3.12 | 0.5829 | 0.57 | 0.08 | 4.17 | 0.2156 | 0.29 | 0.04 | 2.07 | 0.9956 | 0.00 | 0.00 | Inf  |
| NCOR2 | rs2229840  | 0.9885 | 1.00 | 0.70 | 1.42 | 0.7153 | 0.93 | 0.62 | 1.39 | 0.6079 | 0.87 | 0.51 | 1.48 | 0.9907 | 1.00 | 0.56 | 1.80 | 0.4846 | 1.18 | 0.74 | 1.89 | 0.7643 | 0.92 | 0.52 | 1.61 |
| NCOR2 | rs7978237  | 0.3812 | 1.18 | 0.81 | 1.72 | 0.5978 | 1.12 | 0.73 | 1.74 | 0.1334 | 1.50 | 0.88 | 2.55 | 0.1630 | 1.54 | 0.84 | 2.84 | 0.9770 | 1.01 | 0.58 | 1.74 | 0.7207 | 0.89 | 0.46 | 1.70 |
| NCOR2 | rs1812730  | 0.4511 | 0.88 | 0.62 | 1.24 | 0.9647 | 0.99 | 0.66 | 1.48 | 0.9260 | 0.98 | 0.58 | 1.63 | 0.6287 | 1.16 | 0.63 | 2.13 | 0.2713 | 0.77 | 0.48 | 1.23 | 0.5051 | 0.83 | 0.49 | 1.43 |
| NCOR2 | rs837935   | 0.6630 | 1.08 | 0.77 | 1.51 | 0.8470 | 0.96 | 0.66 | 1.41 | 0.9366 | 0.98 | 0.59 | 1.61 | 0.5155 | 0.83 | 0.47 | 1.47 | 0.5520 | 1.15 | 0.72 | 1.83 | 0.8025 | 1.07 | 0.64 | 1.79 |
| NRIP1 | rs2229742  | 0.9704 | 0.99 | 0.66 | 1.50 | 0.8821 | 1.04 | 0.65 | 1.65 | 0.6642 | 1.14 | 0.62 | 2.11 | 0.4375 | 1.31 | 0.67 | 2.56 | 0.6489 | 0.88 | 0.50 | 1.54 | 0.6124 | 0.85 | 0.44 | 1.62 |
| PELP1 | rs9436     | 0.3085 | 0.84 | 0.59 | 1.18 | 0.4082 | 0.85 | 0.57 | 1.25 | 0.6515 | 0.89 | 0.53 | 1.48 | 0.9926 | 1.00 | 0.57 | 1.78 | 0.3746 | 0.81 | 0.51 | 1.29 | 0.2925 | 0.75 | 0.43 | 1.29 |
| PGR   | rs500760   | 0.4379 | 1.14 | 0.82 | 1.59 | 0.5452 | 1.12 | 0.77 | 1.64 | 0.0341 | 1.70 | 1.04 | 2.78 | 0.1323 | 1.54 | 0.88 | 2.70 | 0.3145 | 0.79 | 0.50 | 1.25 | 0.4969 | 0.84 | 0.50 | 1.40 |
| PGR   | rs1042838  | 0.5001 | 1.13 | 0.79 | 1.62 | 0.4961 | 1.15 | 0.77 | 1.73 | 0.0288 | 1.77 | 1.06 | 2.95 | 0.0544 | 1.77 | 0.99 | 3.16 | 0.2629 | 0.75 | 0.45 | 1.25 | 0.3778 | 0.77 | 0.43 | 1.38 |
| PGR   | rs660149   | 0.0360 | 1.42 | 1.02 | 1.97 | 0.0901 | 1.38 | 0.95 | 2.01 | 0.0510 | 1.63 | 1.00 | 2.65 | 0.1480 | 1.50 | 0.87 | 2.60 | 0.3000 | 1.27 | 0.81 | 1.98 | 0.3411 | 1.28 | 0.77 | 2.14 |
| PGR   | rs7116336  | 0.3701 | 0.81 | 0.50 | 1.29 | 0.4135 | 0.80 | 0.46 | 1.37 | 0.1083 | 0.50 | 0.22 | 1.16 | 0.1027 | 0.43 | 0.15 | 1.19 | 0.8086 | 1.07 | 0.60 | 1.92 | 0.6743 | 1.15 | 0.60 | 2.23 |
| PGR   | rs516693   | 0.4429 | 0.86 | 0.59 | 1.26 | 0.6896 | 0.92 | 0.60 | 1.40 | 0.9207 | 0.97 | 0.57 | 1.67 | 0.9352 | 0.97 | 0.53 | 1.80 | 0.3580 | 0.78 | 0.46 | 1.32 | 0.6554 | 0.88 | 0.49 | 1.57 |
| PGR   | rs11571171 | 0.8575 | 1.03 | 0.74 | 1.43 | 0.9881 | 1.00 | 0.69 | 1.45 | 0.7923 | 1.07 | 0.66 | 1.74 | 0.7478 | 1.09 | 0.63 | 1.90 | 0.9242 | 0.98 | 0.63 | 1.52 | 0.7228 | 0.91 | 0.56 | 1.50 |
| PGR   | rs506487   | 0.3219 | 0.85 | 0.61 | 1.17 | 0.1105 | 0.74 | 0.51 | 1.07 | 0.1640 | 0.71 | 0.44 | 1.15 | 0.0576 | 0.59 | 0.34 | 1.02 | 0.9390 | 1.02 | 0.65 | 1.58 | 0.7    |      |      |      |

|       |            |        |      |      |      |        |      |      |      |        |      |      |      |        |      |      |      |        |      |      |      |        |      |      |      |
|-------|------------|--------|------|------|------|--------|------|------|------|--------|------|------|------|--------|------|------|------|--------|------|------|------|--------|------|------|------|
| TCL1A | rs2369049  | 0.0056 | 0.59 | 0.41 | 0.86 | 0.0402 | 0.65 | 0.43 | 0.98 | 0.2383 | 0.72 | 0.42 | 1.24 | 0.6168 | 0.86 | 0.48 | 1.55 | 0.0076 | 0.49 | 0.29 | 0.83 | 0.0208 | 0.50 | 0.27 | 0.90 |
| TCL1A | rs11849538 | 0.0156 | 0.61 | 0.40 | 0.91 | 0.0709 | 0.66 | 0.42 | 1.04 | 0.4175 | 0.79 | 0.45 | 1.39 | 0.7989 | 0.92 | 0.50 | 1.70 | 0.0144 | 0.48 | 0.26 | 0.86 | 0.0329 | 0.48 | 0.24 | 0.94 |
|       | rs2097903  | 0.9090 | 1.02 | 0.71 | 1.47 | 0.9347 | 0.98 | 0.65 | 1.48 | 0.7480 | 0.92 | 0.54 | 1.56 | 0.7190 | 0.90 | 0.49 | 1.63 | 0.6721 | 1.11 | 0.67 | 1.84 | 0.8464 | 1.06 | 0.60 | 1.86 |



Recessive Model

| GENE    | SNPSFX                  | Both Drugs Combined: Side Effects |              |          |          | Both Drugs Combined: Side Effects Due to AIMSS |              |          |          | Letrozole Only Side Effects |              |          |          | Letrozole Only Side Effects Due to AIMSS |              |          |          | Exemestane Only Side Effects |              |          |          | Exemestane Only Side Effects Due to AIMSS |              |          |          |       |
|---------|-------------------------|-----------------------------------|--------------|----------|----------|------------------------------------------------|--------------|----------|----------|-----------------------------|--------------|----------|----------|------------------------------------------|--------------|----------|----------|------------------------------|--------------|----------|----------|-------------------------------------------|--------------|----------|----------|-------|
|         |                         | P-value                           | Hazard Ratio | Lower CI | Upper CI | P-value                                        | Hazard Ratio | Lower CI | Upper CI | P-value                     | Hazard Ratio | Lower CI | Upper CI | P-value                                  | Hazard Ratio | Lower CI | Upper CI | P-value                      | Hazard Ratio | Lower CI | Upper CI | P-value                                   | Hazard Ratio | Lower CI | Upper CI |       |
| ARVCF   | rs165815                | 0.7460                            | 1.13         | 0.53     | 2.42     | 0.9084                                         | 1.05         | 0.43     | 2.58     | 0.2410                      | 1.83         | 0.67     | 5.03     | 0.3259                                   | 1.79         | 0.56     | 5.76     | 0.5847                       | 0.73         | 0.23     | 2.30     | 0.5175                                    | 0.63         | 0.15     | 2.57     |       |
| COMT    | rs4646310               | 0.3935                            | 0.65         | 0.24     | 1.75     | 0.2107                                         | 0.41         | 0.10     | 1.66     | 0.9219                      | 1.06         | 0.33     | 3.38     | 0.8571                                   | 0.88         | 0.21     | 3.61     | 0.2271                       | 0.30         | 0.04     | 2.13     | 0.9957                                    | 0.00         | 0.00     | Inf      |       |
| COMT    | rs933271                | 0.0348                            | 0.46         | 0.23     | 0.95     | 0.0557                                         | 0.45         | 0.20     | 1.02     | 0.3375                      | 0.64         | 0.26     | 1.59     | 0.4226                                   | 0.66         | 0.24     | 1.83     | 0.0539                       | 0.32         | 0.10     | 1.02     | 0.0742                                    | 0.28         | 0.07     | 1.13     |       |
| COMT    | rs6269                  | 0.3198                            | 0.79         | 0.51     | 1.25     | 0.1854                                         | 0.69         | 0.40     | 1.19     | 0.5493                      | 0.83         | 0.44     | 1.54     | 0.3342                                   | 0.69         | 0.32     | 1.47     | 0.5405                       | 0.81         | 0.42     | 1.57     | 0.4583                                    | 0.74         | 0.34     | 1.63     |       |
| COMT    | rs4633                  | 0.2919                            | 1.22         | 0.84     | 1.75     | 0.7805                                         | 1.06         | 0.69     | 1.64     | 0.9363                      | 1.02         | 0.58     | 1.82     | 0.8757                                   | 0.95         | 0.49     | 1.84     | 0.1934                       | 1.37         | 0.85     | 2.20     | 0.6208                                    | 1.15         | 0.65     | 2.04     |       |
| COMT    | rs4818                  | 0.6704                            | 0.90         | 0.55     | 1.46     | 0.4981                                         | 0.82         | 0.46     | 1.47     | 0.8253                      | 0.93         | 0.48     | 1.78     | 0.5057                                   | 0.76         | 0.34     | 1.70     | 0.8043                       | 0.91         | 0.44     | 1.90     | 0.8806                                    | 0.94         | 0.40     | 2.20     |       |
| COMT    | rs4680                  | 0.3789                            | 1.18         | 0.81     | 1.72     | 0.7752                                         | 1.07         | 0.69     | 1.66     | 0.8042                      | 1.08         | 0.60     | 1.92     | 0.9397                                   | 1.03         | 0.52     | 2.02     | 0.3460                       | 1.27         | 0.77     | 2.07     | 0.7518                                    | 1.10         | 0.61     | 1.97     |       |
| COMT    | rs165774                | 0.1533                            | 1.41         | 0.88     | 2.26     | 0.8471                                         | 1.06         | 0.58     | 1.93     | 0.6288                      | 1.21         | 0.55     | 2.66     | 0.7985                                   | 0.88         | 0.32     | 2.43     | 0.1833                       | 1.50         | 0.83     | 2.70     | 0.7097                                    | 1.15         | 0.55     | 2.42     |       |
| COMT    | rs165599                | 0.2159                            | 0.71         | 0.42     | 1.22     | 0.3358                                         | 0.75         | 0.41     | 1.36     | 0.9147                      | 0.96         | 0.44     | 2.10     | 0.8748                                   | 1.07         | 0.46     | 2.51     | 0.1158                       | 0.56         | 0.27     | 1.15     | 0.1575                                    | 0.54         | 0.23     | 1.26     |       |
| COMT    | rs2097903               | 0.0555                            | 0.66         | 0.43     | 1.01     | 0.0757                                         | 0.64         | 0.39     | 1.05     | 0.0129                      | 0.39         | 0.19     | 0.82     | 0.0035                                   | 0.18         | 0.05     | 0.56     | 0.8918                       | 0.96         | 0.57     | 1.64     | 0.4506                                    | 1.24         | 0.71     | 2.19     |       |
| CYP19A1 | rs4646                  | 0.2106                            | 0.62         | 0.29     | 1.32     | 0.3799                                         | 0.69         | 0.30     | 1.57     | 0.1473                      | 0.35         | 0.09     | 1.44     | 0.2770                                   | 0.46         | 0.11     | 1.88     | 0.7678                       | 0.87         | 0.35     | 2.16     | 0.8862                                    | 0.93         | 0.34     | 2.56     |       |
| CYP19A1 | rs10046                 | 0.4282                            | 1.17         | 0.80     | 1.70     | 0.7883                                         | 1.06         | 0.68     | 1.66     | 0.9381                      | 1.02         | 0.57     | 1.84     | 0.8215                                   | 0.92         | 0.46     | 1.84     | 0.3315                       | 1.28         | 0.78     | 2.10     | 0.5829                                    | 1.18         | 0.66     | 2.10     |       |
| CYP19A1 | rs2289105               | 0.4854                            | 1.14         | 0.78     | 1.67     | 0.8348                                         | 1.05         | 0.67     | 1.63     | 0.8616                      | 1.05         | 0.58     | 1.90     | 0.9103                                   | 0.96         | 0.48     | 1.92     | 0.4686                       | 1.20         | 0.73     | 1.97     | 0.7375                                    | 1.10         | 0.62     | 1.97     |       |
| CYP19A1 | rs28757184              | NA                                | 1.00         | 1.00     | 1.00     | NA                                             | 1.00         | 1.00     | 1.00     | NA                          | 1.00         | 1.00     | 1.00     | NA                                       | 1.00         | 1.00     | 1.00     | NA                           | 1.00         | 1.00     | 1.00     | NA                                        | 1.00         | 1.00     | 1.00     |       |
| CYP19A1 | rs700518                | 0.4449                            | 1.17         | 0.78     | 1.74     | 0.9577                                         | 0.99         | 0.61     | 1.60     | 0.6703                      | 1.15         | 0.61     | 2.14     | 0.9112                                   | 0.96         | 0.45     | 2.04     | 0.6088                       | 1.15         | 0.68     | 1.93     | 0.9371                                    | 0.98         | 0.52     | 1.83     |       |
| CYP19A1 | rs3759811               | 0.4376                            | 1.18         | 0.77     | 1.82     | 0.7764                                         | 0.93         | 0.54     | 1.58     | 0.6537                      | 1.16         | 0.61     | 2.22     | 0.8262                                   | 0.91         | 0.41     | 2.03     | 0.5742                       | 1.18         | 0.67     | 2.08     | 0.8208                                    | 0.92         | 0.45     | 1.89     |       |
| CYP19A1 | rs2414096               | 0.4749                            | 1.17         | 0.76     | 1.79     | 0.9023                                         | 0.97         | 0.57     | 1.64     | 0.8567                      | 0.94         | 0.48     | 1.86     | 0.4772                                   | 0.73         | 0.31     | 1.73     | 0.2885                       | 1.35         | 0.78     | 2.34     | 0.6592                                    | 1.16         | 0.59     | 2.28     |       |
| CYP19A1 | rs727479                | 0.6070                            | 0.88         | 0.54     | 1.44     | 0.2249                                         | 0.68         | 0.37     | 1.27     | 0.8214                      | 0.93         | 0.47     | 1.81     | 0.3822                                   | 0.68         | 0.29     | 1.60     | 0.7313                       | 0.88         | 0.42     | 1.82     | 0.4739                                    | 0.72         | 0.29     | 1.79     |       |
| CYP19A1 | rs4775936               | 0.2833                            | 1.25         | 0.83     | 1.87     | 0.9012                                         | 1.03         | 0.63     | 1.69     | 0.2920                      | 1.40         | 0.75     | 2.61     | 0.6796                                   | 1.17         | 0.55     | 2.49     | 0.7228                       | 1.10         | 0.65     | 1.88     | 0.7515                                    | 0.90         | 0.47     | 1.72     |       |
| CYP19A1 | rs10459592              | 0.7853                            | 0.95         | 0.64     | 1.39     | 0.7490                                         | 0.93         | 0.60     | 1.45     | 0.6398                      | 0.87         | 0.50     | 1.53     | 0.5708                                   | 0.83         | 0.44     | 1.58     | 0.7600                       | 1.09         | 0.64     | 1.85     | 0.7566                                    | 1.10         | 0.60     | 2.02     |       |
| CYP19A1 | rs1062033               | 0.2836                            | 1.26         | 0.83     | 1.91     | 0.7875                                         | 1.07         | 0.65     | 1.77     | 0.7797                      | 1.11         | 0.55     | 2.24     | 0.8942                                   | 0.94         | 0.40     | 2.22     | 0.3588                       | 1.28         | 0.76     | 2.15     | 0.7947                                    | 1.09         | 0.58     | 2.04     |       |
| CYP19A1 | rs2008691               | 0.1946                            | 1.60         | 0.79     | 3.27     | 0.1154                                         | 1.85         | 0.86     | 3.97     | 0.6466                      | 1.31         | 0.41     | 4.17     | 0.3788                                   | 1.69         | 0.53     | 5.42     | 0.1863                       | 1.84         | 0.74     | 4.56     | 0.1855                                    | 1.98         | 0.72     | 5.47     |       |
| CYP19A1 | rs1008805               | 0.1660                            | 0.69         | 0.40     | 1.17     | 0.0675                                         | 0.53         | 0.27     | 1.05     | 0.2595                      | 0.62         | 0.27     | 1.43     | 0.1095                                   | 0.39         | 0.12     | 1.24     | 0.3868                       | 0.74         | 0.37     | 1.47     | 0.3138                                    | 0.65         | 0.28     | 1.51     |       |
| CYP19A1 | rs749292                | 0.3519                            | 1.22         | 0.81     | 1.84     | 0.4869                                         | 1.18         | 0.74     | 1.90     | 0.5674                      | 1.21         | 0.63     | 2.31     | 0.7620                                   | 1.12         | 0.53     | 2.39     | 0.5648                       | 1.17         | 0.68     | 2.00     | 0.6033                                    | 1.18         | 0.64     | 2.17     |       |
| CYP19A1 | rs7181886               | 0.5354                            | 1.44         | 0.46     | 4.51     | 0.2716                                         | 1.90         | 0.60     | 6.00     | 0.2460                      | 2.30         | 0.56     | 9.42     | 0.1284                                   | 3.00         | 0.73     | 12.37    | 0.8801                       | 0.86         | 0.12     | 6.18     | 0.8884                                    | 1.15         | 0.16     | 8.32     |       |
| CYP19A1 | rs936308                | 0.6035                            | 1.21         | 0.59     | 2.46     | 0.3926                                         | 1.40         | 0.65     | 3.00     | 0.9615                      | 0.97         | 0.31     | 3.10     | 0.6972                                   | 1.26         | 0.39     | 4.05     | 0.4389                       | 1.43         | 0.58     | 3.53     | 0.4040                                    | 1.54         | 0.56     | 4.24     |       |
| CYP19A1 | rs730154                | 0.5950                            | 0.78         | 0.32     | 1.92     | 0.9533                                         | 1.03         | 0.42     | 2.53     | 0.9579                      | 0.97         | 0.30     | 3.10     | 0.6748                                   | 1.29         | 0.40     | 4.15     | 0.5054                       | 0.62         | 0.15     | 2.53     | 0.7593                                    | 0.80         | 0.20     | 3.30     |       |
| CYP19A1 | rs28566535              | 0.0465                            | 2.29         | 1.01     | 5.19     | 0.0075                                         | 3.07         | 1.35     | 6.99     | 0.1108                      | 2.57         | 0.81     | 8.19     | 0.0437                                   | 3.33         | 1.03     | 10.69    | 0.1869                       | 2.17         | 0.69     | 6.89     | 0.0624                                    | 3.01         | 0.94     | 9.61     |       |
| CYP19A1 | rs4774585               | 0.7179                            | 1.15         | 0.54     | 2.46     | 0.8648                                         | 1.08         | 0.44     | 2.66     | 0.3359                      | 1.57         | 0.63     | 3.91     | 0.3392                                   | 1.65         | 0.59     | 4.59     | 0.6852                       | 0.75         | 0.18     | 3.05     | 0.4810                                    | 0.49         | 0.07     | 3.55     |       |
| CYP19A1 | rs6493497               | 0.3955                            | 1.83         | 0.45     | 7.41     | 0.1920                                         | 2.54         | 0.63     | 10.31    | 0.3850                      | 2.41         | 0.33     | 17.46    | 0.1920                                   | 2.426        | 3.27     | 4.45     | 23.90                        | 0.7490       | 1.38     | 0.19     | 9.93                                      | 0.5317       | 1.88     | 0.26     | 13.60 |
| CYP19A1 | rs752760                | 0.3416                            | 1.20         | 0.82     | 1.75     | 0.1152                                         | 1.40         | 0.92     | 2.13     | 0.2470                      | 1.37         | 0.80     | 2.35     | 0.0654                                   | 1.74         | 0.97     | 3.15     | 0.7462                       | 1.09         | 0.64     | 1.85     | 0.6133                                    | 1.17         | 0.64     | 2.13     |       |
| CYP19A1 | rs60271534 (7 repeats)  | 0.2662                            | 0.80         | 0.55     | 1.18     | 0.6594                                         | 0.90         | 0.57     | 1.43     | 0.3715                      | 0.76         | 0.42     | 1.38     | 0.6384                                   | 0.85         | 0.43     | 1.69     | 0.5820                       | 0.87         | 0.52     | 1.45     | 0.9553                                    | 0.98         | 0.53     | 1.81     |       |
| CYP19A1 | rs60271534 (8 repeats)  | 0.7968                            | 1.05         | 0.71     | 1.57     | 0.4913                                         | 1.17         | 0.75     | 1.82     | 0.2577                      | 1.39         | 0.78     | 2.47     | 0.0651                                   | 1.78         | 0.96     | 3.27     | 0.4632                       | 0.81         | 0.46     | 1.42     | 0.4409                                    | 0.77         | 0.40     | 1.49     |       |
| CYP19A1 | rs60271534 (10 repeats) | 0.4927                            | 0.61         | 0.15     | 2.48     | 0.7459                                         | 0.79         | 0.20     | 3.21     | 0.4367                      | 0.46         | 0.06     | 3.29     | 0.5924                                   | 0.58         | 0.08     | 4.21     | 0.9047                       | 1.13         | 0.16     | 8.11     | 0.6986                                    | 1.48         | 0.20     | 10.66    |       |
| CYP19A1 | rs60271534 (11 repeats) | 0.9610                            | 0.99         | 0.72     | 1.37     | 0.9248                                         | 1.02         | 0.71     | 1.47     | 0.5841                      | 0.88         | 0.54     | 1.41     | 0.4605                                   | 0.82         | 0.47     | 1.40     | 0.7167                       | 1.08         | 0.70     | 1.67     | 0.4546                                    | 1.21         | 0.73     | 2.00     |       |
| CYP19A1 | rs60271534 (12 repeats) | 0.1434                            | 1.55         | 0.86     | 2.80     | 0.9871                                         | 0.99         | 0.44     | 2.26     | 0.7384                      | 1.22         | 0.38     | 3.88     | 0.9489                                   | 1.05         | 0.25     | 4.30     | 0.1844                       | 1.60         | 0.80     | 3.20     | 0.8396                                    | 0.90         | 0.33     | 2.48     |       |
| EP300   | rs20551                 | 0.0989                            | 0.50         | 0.22     | 1.14     | 0.3037                                         | 0.65         | 0.29     | 1.48     | 0.1161                      | 0.21         | 0.03     | 1.48     | 0.1917                                   | 0.27         | 0.04     | 1.94     | 0.4261                       | 0.69         | 0.28     | 1.71     | 0.8034                                    | 0.89         | 0.36     | 2.22     |       |
| ESR1    | rs11963577              | NA                                | 1.00         | 1.00     | 1.00     | NA                                             | 1.00         | 1.00     | 1.00     | NA                          | 1.00         | 1.00     | 1.00     | NA                                       | 1.00         | 1.00     | 1.00     | NA                           | 1.00         | 1.00     | 1.00     | NA                                        | 1.00         | 1.00     | 1.00     |       |
| ESR1    | rs867239                | NA                                | 1.00         | 1.00     | 1.00     | NA                                             | 1.00         | 1.00     | 1.00     | NA                          | 1.00         | 1.00     | 1.00     | NA                                       | 1.00         | 1.00     | 1.00     | NA                           | 1.00         | 1.00     | 1.00     | NA                                        | 1.00         | 1.00     | 1.00     |       |
| ESR1    | rs2077647               | 0.5869                            | 1.11         | 0.77     | 1.59     | 0.4851                                         | 1.16         | 0.77     | 1.74     | 0.7914                      | 1.08         | 0.62     | 1.87     | 0.6089                                   | 1.17         | 0.63     | 2.17     | 0.6817                       | 1.11         | 0.68     | 1.79     | 0.6858                                    | 1.12         | 0.65     | 1.93     |       |
| ESR1    | rs6920483               | NA                                | 1.00         | 1.00     | 1.00     | NA                                             | 1.00         | 1.00     | 1.00     | NA                          | 1.00         | 1.00     | 1.00     | NA                                       | 1.00         | 1.00     | 1.00     | NA                           | 1.00         | 1.00     | 1.00     | NA                                        | 1.00         | 1.00     | 1.00     |       |
| ESR1    | rs3778610               | 0.6408                            | 1.27         | 0.47     | 3.43     | 0.6590                                         | 1.30         | 0.41     | 4.09     | 0.0867                      | 2.43         | 0.88     | 6.69     | 0.1294                                   | 2.47         | 0.77     | 7.97     | 0.9950                       | 0.00         | 0.00     | Inf      | 0.9957                                    | 0.00         | 0.00     | Inf      |       |
| ESR1    | rs3853250               | 0.4373                            | 0.86         | 0.58     | 1.26     | 0.6382                                         | 0.90         | 0.58     | 1.39     | 0.8266                      | 0.94         | 0.52     | 1.69     | 0.6748                                   | 0.86         | 0.43     | 1.73     | 0.3275                       | 0.78         | 0.47     | 1.29     | 0.6794                                    | 0.89         | 0.51     | 1.55     |       |
| ESR1    | rs4870056               | 0.4327                            | 0.85         | 0.57     | 1.27     | 0.7013                                         | 0.92         | 0.58     | 1.43     | 0.9530                      | 0.98         | 0.54     | 1.78     | 0.7814                                   | 0.91         | 0.45     | 1.82     | 0.2789                       | 0.74         | 0.43     | 1.27     | 0.7107                                    | 0.89         | 0.50     | 1.61     |       |
| ESR1    | rs9322331               | 0.3884                            | 1.22         | 0.77     | 1.94     | 0.4826                                         | 1.21         | 0.71     | 2.05     | 0.7464                      | 1.14         | 0.52     | 2.49     | 0.6870                                   | 0.81         | 0.29     | 2.25     | 0.5071                       | 1.21         | 0.68     | 2.16     | 0.3072                                    | 1.39         | 0.74     | 2.60     |       |
| ESR1    | rs2234693               | 0.9236                            | 0.98         | 0.67     | 1.45     | 0.9344                                         | 1.02         | 0.66     | 1.58     | 0.9154                      | 1.03         | 0.58     | 1.83     | 0.9270                                   | 0.97         | 0.50     | 1.89     | 0.7427                       | 0.92         | 0.54     | 1.55     | 0.9342                                    | 1.02         | 0.57     | 1.84     |       |
| ESR1    | rs9340799               | 0.1423                            | 1.39         | 0.90     | 2.16     | 0.1225                                         | 1.48         | 0.90     | 2.44     | 0.2552                      | 1.48         | 0.75     | 2.91     | 0.4615                                   | 1.35         | 0.61     | 3.01     | 0.3815                       | 1.30         | 0.72     | 2.33     | 0.1914                                    | 1.53         | 0.81     | 2.91     |       |
| ESR1    | rs9340817               | 0.6978                            | 0.68         | 0.09     | 4.84     | 0.9930                                         | 0.00         | 0.00     | Inf      | 0.995                       |              |          |          |                                          |              |          |          |                              |              |          |          |                                           |              |          |          |       |

|      |            |        |        |      |       |        |       |      |        |        |      |      |       |        |       |      |       |        |      |      |       |        |       |      |        |
|------|------------|--------|--------|------|-------|--------|-------|------|--------|--------|------|------|-------|--------|-------|------|-------|--------|------|------|-------|--------|-------|------|--------|
| ESR1 | rs3020410  | 0.0154 | 3.42   | 1.26 | 9.24  | 0.0374 | 3.39  | 1.07 | 10.67  | 0.0282 | 4.91 | 1.19 | 20.30 | 0.0111 | 6.38  | 1.53 | 26.69 | 0.1470 | 2.83 | 0.69 | 11.50 | 0.5228 | 1.90  | 0.26 | 13.75  |
| ESR1 | rs3003917  | 0.1620 | 0.37   | 0.09 | 1.49  | 0.3116 | 0.49  | 0.12 | 1.97   | 0.6250 | 0.61 | 0.08 | 4.41  | 0.8233 | 0.80  | 0.11 | 5.79  | 0.1631 | 0.25 | 0.03 | 1.77  | 0.2644 | 0.32  | 0.04 | 2.34   |
| ESR1 | rs6909026  | 0.3475 | 2.57   | 0.36 | 18.38 | 0.2361 | 3.29  | 0.46 | 23.60  | 0.2879 | 2.92 | 0.40 | 21.10 | 0.1956 | 3.70  | 0.51 | 26.85 | NA     | 1.00 | 1.00 | 1.00  | NA     | 1.00  | 1.00 | 1.00   |
| ESR1 | rs3020377  | 0.8259 | 1.05   | 0.66 | 1.67  | 0.3289 | 1.28  | 0.78 | 2.09   | 0.8611 | 1.06 | 0.56 | 2.02  | 0.4666 | 1.29  | 0.65 | 2.58  | 0.7778 | 1.10 | 0.57 | 2.13  | 0.4288 | 1.33  | 0.66 | 2.69   |
| ESR1 | rs9322348  | 0.0581 | 2.62   | 0.97 | 7.07  | 0.0933 | 2.67  | 0.85 | 8.43   | 0.9539 | 1.06 | 0.15 | 7.64  | 0.7481 | 1.38  | 0.19 | 10.01 | 0.0032 | 5.85 | 1.81 | 18.89 | 0.0156 | 5.87  | 1.40 | 24.66  |
| ESR1 | rs2347869  | 0.2674 | 1.25   | 0.84 | 1.87  | 0.2048 | 1.34  | 0.85 | 2.10   | 0.0694 | 1.69 | 0.96 | 2.96  | 0.0098 | 2.21  | 1.21 | 4.05  | 0.8957 | 0.96 | 0.54 | 1.71  | 0.5280 | 0.80  | 0.39 | 1.61   |
| ESR1 | rs9340941  | 0.7927 | 0.93   | 0.52 | 1.64  | 0.5590 | 0.82  | 0.41 | 1.61   | 0.9875 | 0.99 | 0.43 | 2.31  | 0.7225 | 0.83  | 0.30 | 2.31  | 0.7241 | 0.87 | 0.40 | 1.89  | 0.6424 | 0.80  | 0.32 | 2.01   |
| ESR1 | rs1884049  | 0.4563 | 0.71   | 0.29 | 1.74  | 0.8703 | 0.93  | 0.38 | 2.27   | 0.5810 | 1.39 | 0.43 | 4.42  | 0.3336 | 1.78  | 0.55 | 5.71  | 0.1823 | 0.38 | 0.09 | 1.57  | 0.3419 | 0.50  | 0.12 | 2.07   |
| ESR1 | rs9340958  | 0.7270 | 1.42   | 0.20 | 10.15 | 0.5396 | 1.85  | 0.26 | 13.27  | 0.6016 | 1.69 | 0.23 | 12.21 | 0.4358 | 2.20  | 0.30 | 15.93 | NA     | 1.00 | 1.00 | 1.00  | NA     | 1.00  | 1.00 | 1.00   |
| ESR1 | rs2982734  | 0.6132 | 0.88   | 0.54 | 1.44  | 0.9228 | 0.97  | 0.56 | 1.68   | 0.8997 | 0.96 | 0.47 | 1.93  | 0.6126 | 0.80  | 0.34 | 1.88  | 0.6012 | 0.83 | 0.41 | 1.66  | 0.6943 | 1.15  | 0.57 | 2.35   |
| ESR1 | rs9341004  | 0.5717 | 0.57   | 0.08 | 4.05  | 0.7623 | 0.74  | 0.10 | 5.29   | 0.9965 | 0.00 | 0.00 | Inf   | 0.9969 | 0.00  | 0.00 | Inf   | 0.9377 | 0.92 | 0.13 | 6.65  | 0.8490 | 1.21  | 0.17 | 8.75   |
| ESR1 | rs3020368  | 0.7132 | 1.45   | 0.20 | 10.34 | 0.5176 | 1.92  | 0.27 | 13.73  | 0.5766 | 1.76 | 0.24 | 12.66 | 0.4067 | 2.31  | 0.32 | 16.77 | NA     | 1.00 | 1.00 | 1.00  | NA     | 1.00  | 1.00 | 1.00   |
| ESR1 | rs6930355  | 0.4580 | 0.65   | 0.21 | 2.03  | 0.7748 | 0.85  | 0.27 | 2.66   | 0.4388 | 0.46 | 0.06 | 3.30  | 0.5957 | 0.59  | 0.08 | 4.24  | 0.8150 | 0.85 | 0.21 | 3.44  | 0.8736 | 1.12  | 0.27 | 4.59   |
| ESR1 | rs3798565  | 0.0872 | 0.55   | 0.28 | 1.09  | 0.2323 | 0.64  | 0.31 | 1.32   | 0.0730 | 0.40 | 0.14 | 1.09  | 0.2077 | 0.52  | 0.19 | 1.44  | 0.8656 | 0.92 | 0.37 | 2.29  | 0.9589 | 0.97  | 0.35 | 2.69   |
| ESR1 | rs3020371  | 0.6643 | 0.90   | 0.55 | 1.47  | 0.9637 | 0.99  | 0.57 | 1.70   | 0.8354 | 0.92 | 0.44 | 1.94  | 0.5078 | 0.73  | 0.29 | 1.84  | 0.6992 | 0.88 | 0.45 | 1.70  | 0.5976 | 1.20  | 0.61 | 2.36   |
| ESR1 | rs9479188  | 0.6881 | 0.83   | 0.34 | 2.03  | 0.7948 | 0.88  | 0.32 | 2.38   | 0.4680 | 0.59 | 0.15 | 2.43  | 0.7186 | 0.77  | 0.19 | 3.17  | 0.7056 | 1.25 | 0.39 | 3.96  | 0.8864 | 1.11  | 0.27 | 4.54   |
| ESR1 | rs3020376  | 0.9501 | 0.98   | 0.61 | 1.60  | 0.7086 | 1.11  | 0.65 | 1.88   | 0.5240 | 1.24 | 0.65 | 2.36  | 0.6870 | 1.17  | 0.55 | 2.49  | 0.5291 | 0.79 | 0.38 | 1.64  | 0.8518 | 1.07  | 0.51 | 2.27   |
| ESR1 | rs750686   | 0.8993 | 0.97   | 0.60 | 1.57  | 0.7630 | 1.08  | 0.64 | 1.84   | 0.9881 | 1.01 | 0.50 | 2.03  | 0.7197 | 0.86  | 0.36 | 2.01  | 0.8997 | 0.96 | 0.49 | 1.86  | 0.4308 | 1.31  | 0.67 | 2.58   |
| ESR1 | rs9341066  | 0.1201 | 4.78   | 0.66 | 34.39 | 0.0589 | 6.73  | 0.93 | 48.70  | 0.0516 | 7.28 | 0.99 | 53.73 | 0.0219 | 10.57 | 1.41 | 79.45 | NA     | 1.00 | 1.00 | 1.00  | NA     | 1.00  | 1.00 | 1.00   |
| ESR1 | rs2228480  | 0.2845 | 0.58   | 0.22 | 1.57  | 0.5839 | 0.76  | 0.28 | 2.05   | 0.1208 | 0.21 | 0.03 | 1.51  | 0.1935 | 0.27  | 0.04 | 1.95  | 0.3574 | 1.72 | 0.54 | 5.45  | 0.1574 | 2.31  | 0.72 | 7.37   |
| ESR1 | rs9341070  | 0.0205 | 10.44  | 1.43 | 75.99 | 0.9945 | 0.00  | 0.00 | Inf    | NA     | 1.00 | 1.00 | 1.00  | NA     | 1.00  | 1.00 | 1.00  | 0.0317 | 8.99 | 1.21 | 66.70 | 0.9960 | 0.00  | 0.00 | Inf    |
| ESR1 | rs3798577  | 0.9427 | 1.01   | 0.69 | 1.49  | 0.3796 | 1.21  | 0.79 | 1.84   | 0.6874 | 0.88 | 0.48 | 1.62  | 0.9615 | 0.98  | 0.51 | 1.91  | 0.6787 | 1.11 | 0.67 | 1.84  | 0.2316 | 1.39  | 0.81 | 2.41   |
| ESR1 | rs9341072  | 0.0208 | 10.41  | 1.43 | 75.88 | 0.9944 | 0.00  | 0.00 | Inf    | NA     | 1.00 | 1.00 | 1.00  | NA     | 1.00  | 1.00 | 1.00  | 0.0304 | 9.19 | 1.23 | 68.48 | 0.9960 | 0.00  | 0.00 | Inf    |
| ESR1 | rs3798758  | 0.3740 | 2.44   | 0.34 | 17.46 | 0.2609 | 3.10  | 0.43 | 22.18  | 0.3043 | 2.82 | 0.39 | 20.35 | 0.2097 | 3.55  | 0.49 | 25.78 | NA     | 1.00 | 1.00 | 1.00  | NA     | 1.00  | 1.00 | 1.00   |
| ESR1 | rs2747648  | 0.5669 | 1.78   | 0.25 | 12.70 | 0.9934 | 0.00  | 0.00 | Inf    | NA     | 1.00 | 1.00 | 1.00  | NA     | 1.00  | 1.00 | 1.00  | 0.6644 | 1.55 | 0.22 | 11.13 | 0.9954 | 0.00  | 0.00 | Inf    |
| ESR1 | rs9341077  | 0.9943 | 0.00   | 0.00 | Inf   | 0.9950 | 0.00  | 0.00 | Inf    | NA     | 1.00 | 1.00 | 1.00  | NA     | 1.00  | 1.00 | 1.00  | 0.9960 | 0.00 | 0.00 | Inf   | 0.9965 | 0.00  | 0.00 | Inf    |
| ESR1 | rs1062577  | 0.9927 | 0.00   | 0.00 | Inf   | 0.9935 | 0.00  | 0.00 | Inf    | 0.9958 | 0.00 | 0.00 | Inf   | 0.9963 | 0.00  | 0.00 | Inf   | 0.9960 | 0.00 | 0.00 | Inf   | 0.9964 | 0.00  | 0.00 | Inf    |
| ESR1 | rs2813543  | 0.9548 | 0.98   | 0.53 | 1.81  | 0.5668 | 0.80  | 0.37 | 1.72   | 0.6939 | 0.83 | 0.33 | 2.07  | 0.7634 | 0.86  | 0.31 | 2.37  | 0.6244 | 1.23 | 0.54 | 2.82  | 0.6815 | 0.78  | 0.25 | 2.50   |
| ESR1 | rs926848   | 0.9931 | 0.00   | 0.00 | Inf   | 0.9939 | 0.00  | 0.00 | Inf    | 0.9958 | 0.00 | 0.00 | Inf   | 0.9963 | 0.00  | 0.00 | Inf   | NA     | 1.00 | 1.00 | 1.00  | NA     | 1.00  | 1.00 | 1.00   |
| ESR2 | IU08-E2-01 | NA     | 1.00   | 1.00 | 1.00  | NA     | 1.00  | 1.00 | 1.00   | NA     | 1.00 | 1.00 | 1.00  | NA     | 1.00  | 1.00 | 1.00  | NA     | 1.00 | 1.00 | 1.00  | NA     | 1.00  | 1.00 | 1.00   |
| ESR2 | IU08-E2-02 | 0.0166 | 11.35  | 1.55 | 82.83 | 0.0026 | 22.16 | 2.96 | 166.08 | NA     | 1.00 | 1.00 | 1.00  | NA     | 1.00  | 1.00 | 1.00  | 0.0261 | 9.81 | 1.31 | 73.26 | 0.0056 | 18.33 | 2.35 | 143.22 |
| ESR2 | rs8006145  | 0.6684 | 0.87   | 0.46 | 1.65  | 0.7725 | 0.90  | 0.44 | 1.84   | 0.6451 | 0.81 | 0.32 | 2.01  | 0.7166 | 0.83  | 0.30 | 2.30  | 0.9686 | 1.02 | 0.41 | 2.52  | 0.9010 | 1.07  | 0.39 | 2.94   |
| ESR2 | rs4986938  | 0.6504 | 0.89   | 0.55 | 1.45  | 0.7587 | 0.92  | 0.53 | 1.58   | 0.3538 | 0.71 | 0.34 | 1.48  | 0.3641 | 0.67  | 0.29 | 1.58  | 0.6255 | 1.17 | 0.62 | 2.21  | 0.5020 | 1.27  | 0.63 | 2.58   |
| ESR2 | rs1256064  | 0.8990 | 1.0473 | 0.51 | 2.14  | 0.6301 | 1.21  | 0.56 | 2.59   | 0.0806 | 2.46 | 0.90 | 6.77  | 0.1368 | 2.42  | 0.76 | 7.78  | 0.3119 | 0.60 | 0.22 | 1.63  | 0.6505 | 0.79  | 0.29 | 2.18   |
| ESR2 | rs867443   | 0.6816 | 0.87   | 0.44 | 1.70  | 0.7166 | 0.87  | 0.40 | 1.86   | 0.4104 | 0.65 | 0.24 | 1.80  | 0.4313 | 0.63  | 0.20 | 2.01  | 0.5591 | 1.31 | 0.53 | 3.24  | 0.5479 | 1.36  | 0.50 | 3.76   |
| ESR2 | rs944045   | 0.7178 | 1.20   | 0.44 | 3.25  | 0.7932 | 1.17  | 0.37 | 3.67   | 0.0197 | 5.36 | 1.31 | 21.96 | 0.2196 | 3.46  | 0.48 | 25.10 | 0.4549 | 0.59 | 0.14 | 2.39  | 0.7083 | 0.76  | 0.19 | 3.13   |
| ESR2 | rs944460   | 0.9926 | 0.00   | 0.00 | Inf   | 0.9935 | 0.00  | 0.00 | Inf    | 0.9957 | 0.00 | 0.00 | Inf   | 0.9963 | 0.00  | 0.00 | Inf   | 0.9960 | 0.00 | 0.00 | Inf   | 0.9965 | 0.00  | 0.00 | Inf    |
| ESR2 | rs1256062  | 0.6647 | 1.22   | 0.50 | 2.97  | 0.6332 | 1.27  | 0.47 | 3.46   | 0.0421 | 3.33 | 1.04 | 10.59 | 0.1421 | 2.88  | 0.70 | 11.86 | 0.4181 | 0.56 | 0.14 | 2.28  | 0.6739 | 0.74  | 0.18 | 3.02   |
| ESR2 | rs1256059  | 0.8079 | 1.05   | 0.70 | 1.59  | 0.5463 | 1.15  | 0.73 | 1.82   | 0.7957 | 0.92 | 0.48 | 1.75  | 0.9746 | 0.99  | 0.48 | 2.03  | 0.6465 | 1.13 | 0.66 | 1.94  | 0.4604 | 1.25  | 0.69 | 2.28   |
| ESR2 | rs1952585  | 0.5702 | 1.2671 | 0.56 | 2.87  | 0.4724 | 1.39  | 0.57 | 3.41   | 0.0182 | 3.39 | 1.23 | 9.35  | 0.0394 | 3.42  | 1.06 | 11.00 | 0.3365 | 0.50 | 0.12 | 2.05  | 0.5580 | 0.66  | 0.16 | 2.69   |
| ESR2 | rs17766755 | 0.8599 | 1.05   | 0.63 | 1.74  | 0.8790 | 1.05  | 0.59 | 1.87   | 0.5393 | 0.78 | 0.36 | 1.71  | 0.4854 | 0.72  | 0.29 | 1.81  | 0.2496 | 1.48 | 0.76 | 2.87  | 0.2333 | 1.57  | 0.75 | 3.32   |
| ESR2 | rs2274705  | 0.5505 | 1.35   | 0.50 | 3.67  | 0.6233 | 1.33  | 0.42 | 4.21   | 0.0017 | 6.47 | 2.02 | 20.75 | 0.0141 | 5.92  | 1.43 | 24.51 | 0.2674 | 0.33 | 0.05 | 2.36  | 0.4138 | 0.44  | 0.06 | 3.17   |
| ESR2 | rs10140457 | 0.3679 | 2.47   | 0.35 | 17.66 | 0.2561 | 3.13  | 0.44 | 22.44  | 0.2914 | 2.90 | 0.40 | 20.92 | 0.1997 | 3.66  | 0.50 | 26.52 | NA     | 1.00 | 1.00 | 1.00  | NA     | 1.00  | 1.00 | 1.00   |
| ESR2 | rs1256049  | NA     | 1.00   | 1.00 | 1.00  | NA     | 1.00  | 1.00 | 1.00   | NA     | 1.00 | 1.00 | 1.00  | NA     | 1.00  | 1.00 | 1.00  | NA     | 1.00 | 1.00 | 1.00  | NA     | 1.00  | 1.00 | 1.00   |
| ESR2 | rs8003490  | 0.9931 | 0.00   | 0.00 | Inf   | 0.9939 | 0.00  | 0.00 | Inf    | NA     | 1.00 | 1.00 | 1.00  | NA     | 1.00  | 1.00 | 1.00  | 0.9952 | 0.00 | 0.00 | Inf   | 0.9958 | 0.00  | 0.00 | Inf    |
| ESR2 | rs1256031  | 0.9687 | 1.01   | 0.67 | 1.51  | 0.4152 | 1.20  | 0.77 | 1.87   | 0.9173 | 1.03 | 0.56 | 1.90  | 0.6011 | 1.20  | 0.61 | 2.35  | 0.8742 | 0.96 | 0.56 | 1.64  | 0.6158 | -0.86 | 0.65 | 2.09   |
| ESR2 | rs3020450  | 0.8453 | 1.06   | 0.61 | 1.83  | 0.6761 | 0.86  | 0.44 | 1.71   | 0.8238 | 1.09 | 0.50 | 2.39  | 0.9913 | 0.99  | 0.40 | 2.50  | 0.8886 | 1.06 | 0.49 | 2.29  | 0.6114 | 0.77  | 0.28 | 2.12   |
| EZH2 | rs2302427  | 0.9931 | 0.00   | 0.00 | Inf   | 0.9939 | 0.00  | 0.00 | Inf    | NA     | 1.00 | 1.00 | 1.00  | NA     | 1.00  | 1.00 | 1.00  | 0.9952 | 0.00 | 0.00 | Inf   | 0.9958 | 0.00  | 0.00 | Inf    |
| HCRT | rs9902709  | 0.9189 | 1.05   | 0.39 | 2.84  | 0.5172 | 1.39  | 0.51 | 3.77   | 0.0943 | 2.37 | 0.86 | 6.52  | 0.0281 | 3.14  | 1.13 | 8.72  | 0.9940 | 0.00 | 0.00 | Inf   | 0.9948 | 0.00  | 0.00 | Inf    |
| HCRT | rs41513044 | NA     | 1.00   | 1.00 | 1.00  | NA     | 1.00  | 1.00 | 1.00   | NA     | 1.00 | 1.00 | 1.00  | NA     | 1.00  | 1.00 | 1.00  | NA     |      |      |       |        |       |      |        |

|        |            |        |      |      |       |        |      |      |       |        |      |      |       |        |      |      |       |        |      |      |       |        |      |      |       |
|--------|------------|--------|------|------|-------|--------|------|------|-------|--------|------|------|-------|--------|------|------|-------|--------|------|------|-------|--------|------|------|-------|
| HTR2A  | rs594242   | 0.9164 | 1.04 | 0.46 | 2.36  | 0.7759 | 1.14 | 0.46 | 2.79  | 0.0228 | 3.28 | 1.18 | 9.10  | 0.0491 | 3.26 | 1.00 | 10.58 | 0.2040 | 0.40 | 0.10 | 1.64  | 0.3664 | 0.52 | 0.13 | 2.14  |
| HTR2A  | rs6313     | 0.9588 | 1.01 | 0.66 | 1.54  | 0.9657 | 1.01 | 0.62 | 1.64  | 0.7070 | 0.89 | 0.48 | 1.66  | 0.4345 | 0.74 | 0.35 | 1.57  | 0.5359 | 1.20 | 0.67 | 2.13  | 0.3133 | 1.38 | 0.74 | 2.60  |
| HTR2A  | rs1805055  | 0.2570 | 0.71 | 0.39 | 1.28  | 0.2734 | 0.68 | 0.35 | 1.35  | 0.6173 | 0.83 | 0.40 | 1.73  | 0.8642 | 0.93 | 0.42 | 2.07  | 0.4142 | 0.66 | 0.24 | 1.80  | 0.2278 | 0.42 | 0.10 | 1.72  |
| HTR2A  | rs6306     | 0.9939 | 0.00 | 0.00 | Inf   | 0.9946 | 0.00 | 0.00 | Inf   | 0.9962 | 0.00 | 0.00 | Inf   | 0.9966 | 0.00 | 0.00 | Inf   | NA     | 1.00 | 1.00 | 1.00  | NA     | 1.00 | 1.00 | 1.00  |
| HTR2A  | rs6311     | 0.8509 | 0.96 | 0.63 | 1.47  | 0.8681 | 0.96 | 0.59 | 1.56  | 0.7433 | 0.90 | 0.49 | 1.66  | 0.5263 | 0.79 | 0.39 | 1.63  | 0.7907 | 1.08 | 0.60 | 1.96  | 0.5479 | 1.22 | 0.64 | 2.34  |
| HTR2A  | rs1328685  | 0.9936 | 0.00 | 0.00 | Inf   | 0.9944 | 0.00 | 0.00 | Inf   | 0.9958 | 0.00 | 0.00 | Inf   | 0.9963 | 0.00 | 0.00 | Inf   | 0.9952 | 0.00 | 0.00 | Inf   | 0.9958 | 0.00 | 0.00 | Inf   |
| NCOA1  | rs920418   | 0.1896 | 0.76 | 0.50 | 1.15  | 0.6681 | 0.91 | 0.58 | 1.42  | 0.3181 | 0.71 | 0.36 | 1.39  | 0.6792 | 0.86 | 0.42 | 1.77  | 0.3222 | 0.76 | 0.45 | 1.30  | 0.7440 | 0.91 | 0.51 | 1.62  |
| NCOA1  | rs2033861  | 0.5664 | 0.88 | 0.58 | 1.35  | 0.4621 | 0.83 | 0.51 | 1.36  | 0.8336 | 0.94 | 0.51 | 1.71  | 0.9590 | 0.98 | 0.50 | 1.94  | 0.5793 | 0.85 | 0.47 | 1.53  | 0.3509 | 0.71 | 0.34 | 1.46  |
| NCOA1  | rs11125744 | 0.1803 | 0.39 | 0.10 | 1.56  | 0.3252 | 0.50 | 0.12 | 2.01  | 0.5279 | 0.53 | 0.07 | 3.82  | 0.7113 | 0.69 | 0.09 | 4.99  | 0.2159 | 0.29 | 0.04 | 2.07  | 0.3203 | 0.37 | 0.05 | 2.65  |
| NCOA1  | rs3731628  | NA     | 1.00 | 1.00 | 1.00  |
| NCOA1  | rs2083389  | 0.0106 | 2.11 | 1.19 | 3.75  | 0.0594 | 1.93 | 0.97 | 3.84  | 0.0139 | 2.89 | 1.24 | 6.75  | 0.3048 | 1.85 | 0.57 | 5.97  | 0.2545 | 1.57 | 0.72 | 3.44  | 0.1653 | 1.82 | 0.78 | 4.27  |
| NCOA1  | rs1804645  | NA     | 1.00 | 1.00 | 1.00  |
| NCOA1  | rs17737058 | 0.0032 | 2.37 | 1.33 | 4.19  | 0.0084 | 2.40 | 1.25 | 4.62  | 0.0074 | 3.18 | 1.36 | 7.43  | 0.0502 | 2.80 | 1.00 | 7.84  | 0.1332 | 1.81 | 0.83 | 3.94  | 0.0955 | 2.05 | 0.88 | 4.76  |
| NCOA2  | rs3088092  | 0.3140 | 2.75 | 0.38 | 19.72 | 0.1872 | 3.77 | 0.52 | 27.10 | NA     | 1.00 | 1.00 | 1.00  | NA     | 1.00 | 1.00 | 1.00  | 0.4128 | 2.28 | 0.32 | 16.49 | 0.2596 | 3.13 | 0.43 | 22.66 |
| NCOA2  | rs2228591  | 0.9947 | 0.00 | 0.00 | Inf   | 0.9953 | 0.00 | 0.00 | Inf   | 0.9951 | 0.00 | 0.00 | Inf   | 0.9956 | 0.00 | 0.00 | Inf   | NA     | 1.00 | 1.00 | 1.00  | NA     | 1.00 | 1.00 | 1.00  |
| NCOA2  | rs2272670  | 0.1601 | 1.49 | 0.86 | 2.58  | 0.0905 | 1.68 | 0.92 | 3.06  | 0.0451 | 2.06 | 1.02 | 4.17  | 0.0226 | 2.42 | 1.13 | 5.16  | 0.8947 | 1.06 | 0.43 | 2.63  | 0.8220 | 1.12 | 0.41 | 3.10  |
| NCOA2  | rs4738079  | 0.9932 | 0.00 | 0.00 | Inf   | 0.9941 | 0.00 | 0.00 | Inf   | 0.9959 | 0.00 | 0.00 | Inf   | 0.9964 | 0.00 | 0.00 | Inf   | NA     | 1.00 | 1.00 | 1.00  | NA     | 1.00 | 1.00 | 1.00  |
| NCOA2  | rs1380896  | 0.6041 | 1.20 | 0.61 | 2.36  | 0.3243 | 1.44 | 0.70 | 2.97  | 0.0445 | 2.15 | 1.02 | 4.56  | 0.0224 | 2.57 | 1.14 | 5.79  | 0.2199 | 0.29 | 0.04 | 2.09  | 0.3450 | 0.39 | 0.05 | 2.79  |
| NCOA3  | rs6094752  | 0.7744 | 1.33 | 0.19 | 9.53  | 0.5884 | 1.72 | 0.24 | 12.34 | 0.6354 | 1.61 | 0.22 | 11.63 | 0.4660 | 2.09 | 0.29 | 15.14 | NA     | 1.00 | 1.00 | 1.00  | NA     | 1.00 | 1.00 | 1.00  |
| NCOA3  | rs2230782  | 0.0593 | 3.84 | 0.95 | 15.56 | 0.0249 | 4.98 | 1.22 | 20.24 | 0.1856 | 3.81 | 0.53 | 27.62 | 0.1231 | 4.77 | 0.65 | 34.78 | 0.1891 | 3.77 | 0.52 | 27.31 | 0.1156 | 4.93 | 0.68 | 35.96 |
| NCOA3  | rs2076546  | 0.9922 | 0.00 | 0.00 | Inf   | 0.9931 | 0.00 | 0.00 | Inf   | 0.9958 | 0.00 | 0.00 | Inf   | 0.9963 | 0.00 | 0.00 | Inf   | 0.9956 | 0.00 | 0.00 | Inf   | 0.9961 | 0.00 | 0.00 | Inf   |
| NCOA3  | rs365602   | 0.5468 | 0.65 | 0.16 | 2.63  | 0.3731 | 0.41 | 0.06 | 2.93  | 0.9965 | 0.00 | 0.00 | Inf   | 0.9969 | 0.00 | 0.00 | Inf   | 0.5870 | 1.48 | 0.36 | 6.03  | 0.9543 | 0.94 | 0.13 | 6.83  |
| NCOA3  | rs396221   | 0.3874 | 1.20 | 0.80 | 1.80  | 0.3045 | 1.27 | 0.80 | 2.02  | 0.6201 | 1.18 | 0.61 | 2.26  | 0.7698 | 1.12 | 0.52 | 2.39  | 0.5762 | 1.16 | 0.69 | 1.96  | 0.3490 | 1.32 | 0.74 | 2.37  |
| NCOR1  | rs1065822  | 0.0439 | 0.65 | 0.43 | 0.99  | 0.0521 | 0.62 | 0.38 | 1.00  | 0.1491 | 0.64 | 0.35 | 1.17  | 0.1029 | 0.55 | 0.27 | 1.13  | 0.2129 | 0.69 | 0.39 | 1.23  | 0.3224 | 0.72 | 0.38 | 1.38  |
| NCOR1  | rs1073093  | NA     | 1.00 | 1.00 | 1.00  |
| NCOR1  | rs61753150 | NA     | 1.00 | 1.00 | 1.00  |
| NCOR2  | rs2229840  | 0.0232 | 2.81 | 1.15 | 6.86  | 0.1607 | 2.27 | 0.72 | 7.16  | 0.3821 | 2.41 | 0.33 | 17.41 | 0.9963 | 0.00 | 0.00 | Inf   | 0.0596 | 2.63 | 0.96 | 7.19  | 0.0932 | 2.70 | 0.85 | 8.63  |
| NCOR2  | rs7978237  | 0.6598 | 1.22 | 0.50 | 2.98  | 0.9477 | 0.96 | 0.31 | 3.03  | 0.4758 | 1.45 | 0.52 | 3.99  | 0.5251 | 1.46 | 0.45 | 4.72  | 0.8315 | 1.24 | 0.17 | 8.91  | 0.9966 | 0.00 | 0.00 | Inf   |
| NCOR2  | rs1812730  | 0.6816 | 0.91 | 0.59 | 1.41  | 0.6614 | 0.90 | 0.55 | 1.47  | 0.1027 | 0.50 | 0.21 | 1.15  | 0.1003 | 0.42 | 0.15 | 1.18  | 0.4778 | 1.20 | 0.72 | 2.01  | 0.4756 | 1.23 | 0.69 | 2.21  |
| NCOR2  | rs837935   | 0.9559 | 0.99 | 0.60 | 1.62  | 0.9685 | 0.99 | 0.56 | 1.74  | 0.8499 | 0.93 | 0.46 | 1.89  | 0.9257 | 0.96 | 0.43 | 2.15  | 0.7996 | 1.09 | 0.54 | 2.20  | 0.8497 | 1.08 | 0.49 | 2.38  |
| NRIP1  | rs2229742  | 0.3900 | 0.42 | 0.06 | 3.02  | 0.5559 | 0.55 | 0.08 | 3.96  | 0.9965 | 0.00 | 0.00 | Inf   | 0.9969 | 0.00 | 0.00 | Inf   | 0.5386 | 0.54 | 0.07 | 3.87  | 0.7317 | 0.71 | 0.10 | 5.11  |
| PELP1  | rs9436     | 0.4264 | 1.27 | 0.70 | 2.29  | 0.7852 | 1.11 | 0.54 | 2.27  | 0.4103 | 0.55 | 0.14 | 2.26  | 0.6630 | 0.73 | 0.18 | 3.00  | 0.1527 | 1.62 | 0.84 | 3.14  | 0.5978 | 1.25 | 0.54 | 2.91  |
| PGR    | rs500760   | 0.7193 | 0.89 | 0.47 | 1.69  | 0.8476 | 1.07 | 0.54 | 2.12  | 0.6514 | 1.21 | 0.52 | 2.81  | 0.5296 | 1.35 | 0.53 | 3.39  | 0.3924 | 0.64 | 0.24 | 1.76  | 0.7771 | 0.86 | 0.31 | 2.38  |
| PGR    | rs1042838  | 0.2884 | 0.47 | 0.12 | 1.90  | 0.4789 | 0.60 | 0.15 | 2.44  | 0.7402 | 0.79 | 0.19 | 3.22  | 0.9827 | 1.02 | 0.25 | 4.18  | 0.9949 | 0.00 | 0.00 | Inf   | 0.9955 | 0.00 | 0.00 | Inf   |
| PGR    | rs660149   | 0.4817 | 1.24 | 0.68 | 2.23  | 0.3570 | 1.36 | 0.71 | 2.60  | 0.6461 | 1.27 | 0.46 | 3.48  | 0.3280 | 1.66 | 0.60 | 4.62  | 0.7247 | 1.14 | 0.55 | 2.37  | 0.7836 | 1.13 | 0.48 | 2.62  |
| PGR    | rs7116336  | 0.3099 | 0.36 | 0.05 | 2.58  | 0.4606 | 0.48 | 0.07 | 3.41  | 0.9962 | 0.00 | 0.00 | Inf   | 0.9967 | 0.00 | 0.00 | Inf   | 0.6844 | 1.51 | 0.21 | 10.84 | 0.4639 | 2.09 | 0.29 | 15.15 |
| PGR    | rs516693   | 0.2386 | 1.99 | 0.63 | 6.24  | 0.0948 | 2.66 | 0.84 | 8.38  | 0.0138 | 5.99 | 1.44 | 24.90 | 0.0042 | 8.15 | 1.94 | 34.29 | 0.8590 | 0.84 | 0.12 | 6.01  | 0.9107 | 1.12 | 0.16 | 8.09  |
| PGR    | rs11571171 | 0.1229 | 1.49 | 0.90 | 2.47  | 0.2018 | 1.46 | 0.82 | 2.60  | 0.3520 | 1.45 | 0.66 | 3.18  | 0.1133 | 1.91 | 0.86 | 4.24  | 0.2169 | 1.52 | 0.78 | 2.94  | 0.7605 | 1.14 | 0.49 | 2.64  |
| PGR    | rs506487   | 0.7158 | 0.91 | 0.54 | 1.53  | 0.4963 | 0.81 | 0.43 | 1.50  | 0.1124 | 0.44 | 0.16 | 1.21  | 0.1498 | 0.42 | 0.13 | 1.36  | 0.2881 | 1.40 | 0.75 | 2.58  | 0.6159 | 1.21 | 0.57 | 2.55  |
| PGR    | rs518162   | 0.4668 | 0.48 | 0.07 | 3.44  | 0.6553 | 0.64 | 0.09 | 4.58  | 0.9955 | 0.00 | 0.00 | Inf   | 0.9960 | 0.00 | 0.00 | Inf   | 0.9253 | 1.10 | 0.15 | 7.91  | 0.6839 | 1.51 | 0.21 | 10.90 |
| SLC6A4 | rs140700   | 0.9097 | 1.12 | 0.16 | 8.01  | 0.7195 | 1.43 | 0.20 | 10.27 | 0.3302 | 2.67 | 0.37 | 19.26 | 0.2254 | 3.40 | 0.47 | 24.67 | 0.9952 | 0.00 | 0.00 | Inf   | 0.9958 | 0.00 | 0.00 | Inf   |
| SLC6A4 | rs16965628 | 0.9937 | 0.00 | 0.00 | Inf   | 0.9945 | 0.00 | 0.00 | Inf   | 0.9962 | 0.00 | 0.00 | Inf   | 0.9966 | 0.00 | 0.00 | Inf   | NA     | 1.00 | 1.00 | 1.00  | NA     | 1.00 | 1.00 | 1.00  |
| SLC6A4 | rs25532    | 0.0401 | 2.56 | 1.04 | 6.27  | 0.0086 | 3.35 | 1.36 | 8.27  | 0.1216 | 2.51 | 0.78 | 8.06  | 0.0472 | 3.29 | 1.02 | 10.68 | 0.1382 | 2.92 | 0.71 | 12.00 | 0.0613 | 3.89 | 0.94 | 16.14 |
| SLC6A4 | rs25531    | NA     | 1.00 | 1.00 | 1.00  |
| TCL1A  | rs7158782  | 0.0534 | 0.32 | 0.10 | 1.02  | 0.1402 | 0.42 | 0.13 | 1.33  | 0.9951 | 0.00 | 0.00 | Inf   | 0.9957 | 0.00 | 0.00 | Inf   | 0.2176 | 0.48 | 0.15 | 1.53  | 0.4521 | 0.64 | 0.20 | 2.04  |
| TCL1A  | rs7159713  | 0.0327 | 0.22 | 0.05 | 0.88  | 0.0770 | 0.28 | 0.07 | 1.15  | 0.9951 | 0.00 | 0.00 | Inf   | 0.9957 | 0.00 | 0.00 | Inf   | 0.1217 | 0.33 | 0.08 | 1.34  | 0.2447 | 0.43 | 0.11 | 1.77  |
| TCL1A  | rs2369049  | 0.0327 | 0.22 | 0.05 | 0.88  | 0.0770 | 0.28 | 0.07 | 1.15  | 0.9951 | 0.00 | 0.00 | Inf   | 0.9957 | 0.00 | 0.00 | Inf   | 0.1217 | 0.33 | 0.08 | 1.34  | 0.2447 | 0.43 | 0.11 | 1.77  |
| TCL1A  | rs11849538 | 0.9921 | 0.00 | 0.00 | Inf   | 0.9931 | 0.00 | 0.00 | Inf   | 0.9962 | 0.00 | 0.00 | Inf   | 0.9966 | 0.00 | 0.00 | Inf   | 0.9954 | 0.00 | 0.00 | Inf   | 0.9959 | 0.00 | 0.00 | Inf   |
| COMT   | rs2097903  | 0.0555 | 0.66 | 0.43 | 1.01  | 0.0757 | 0.64 | 0.39 | 1.05  | 0.0129 | 0.39 | 0.19 | 0.82  | 0.0035 | 0.18 | 0.05 | 0.56  | 0.8918 | 0.96 | 0.57 | 1.64  | 0.4506 | 1.24 | 0.71 | 2.19  |
