# Supplementary material
Source: PubMed Central journal article supplement (PMC3646626)
Supplement: NIHMS462885-supplement-10549_2013_2504_MOESM5_ESM.pdf [file NIHMS462885-supplement-10549_2013_2504_MOESM5_ESM.pdf]

**Supplementary Table 4.** Multivariate analysis of associations between candidate gene variants and treatment discontinuation because of toxicity, adjusted for age and AI medication. Results for additive, dominant, and recessive statistical models are given. CI: confidence interval; HR: hazard ratio; SNP: single nucleotide polymorphism.

Discontinued Because of Any Toxicity – Analyses adjusted for Age > 55 + AI medication

| Additive Model |         |     |               |               | Dominant Model |         |     |               |               | Recessive Model |         |     |               |               |
|----------------|---------|-----|---------------|---------------|----------------|---------|-----|---------------|---------------|-----------------|---------|-----|---------------|---------------|
| SNP            | P-value | HR  | Lower 0.95 CI | Upper 0.95 CI | SNP            | P-value | HR  | Lower 0.95 CI | Upper 0.95 CI | SNP             | P-value | HR  | Lower 0.95 CI | Upper 0.95 CI |
| rs2369049      | 0.002   | 0.6 | 0.4           | 0.8           | rs2369049      | 0.006   | 0.6 | 0.4           | 0.9           | rs2296972       | 0.002   | 0.4 | 0.2           | 0.7           |
| rs2296972      | 0.003   | 0.7 | 0.5           | 0.9           | rs9340835      | 0.010   | 0.6 | 0.5           | 0.9           | rs9322336       | 0.002   | 2.6 | 1.4           | 4.9           |
| rs11849538     | 0.007   | 0.6 | 0.4           | 0.9           | rs1805055      | 0.012   | 0.5 | 0.3           | 0.9           | rs17737058      | 0.003   | 2.4 | 1.4           | 4.3           |
| rs7158782      | 0.010   | 0.7 | 0.5           | 0.9           | rs7997012      | 0.014   | 0.7 | 0.5           | 0.9           | rs9567746       | 0.004   | 3.3 | 1.5           | 7.6           |
| rs7159713      | 0.015   | 0.7 | 0.5           | 0.9           | rs11849538     | 0.018   | 0.6 | 0.4           | 0.9           | rs731779        | 0.004   | 3.3 | 1.5           | 7.5           |
| rs9340835      | 0.016   | 0.7 | 0.5           | 0.9           | rs7158782      | 0.029   | 0.7 | 0.5           | 1.0           | rs9322335       | 0.009   | 2.1 | 1.2           | 3.8           |
| rs933271       | 0.016   | 0.7 | 0.6           | 0.9           | rs9341077      | 0.030   | 0.4 | 0.2           | 0.9           | rs2083389       | 0.010   | 2.1 | 1.2           | 3.8           |
| rs9341077      | 0.029   | 0.4 | 0.2           | 0.9           | rs660149       | 0.038   | 1.4 | 1.0           | 2.0           | rs2229840       | 0.026   | 2.8 | 1.1           | 6.8           |
| rs2347868      | 0.033   | 1.3 | 1.0           | 1.8           | rs9341072      | 0.042   | 8.0 | 1.1           | 59.6          | rs7159713       | 0.027   | 0.2 | 0.1           | 0.8           |
| rs9341072      | 0.042   | 2.8 | 1.0           | 7.7           | rs2228480      | 0.050   | 0.7 | 0.5           | 1.0           | rs2369049       | 0.027   | 0.2 | 0.1           | 0.8           |
| rs11125744     | 0.048   | 0.7 | 0.5           | 1.0           | rs1709181      | 0.050   | 0.7 | 0.5           | 1.0           | rs3020410       | 0.027   | 3.1 | 1.1           | 8.4           |
| rs2228480      | 0.050   | 0.7 | 0.5           | 1.0           | rs2296972      | 0.054   | 0.7 | 0.5           | 1.0           | rs933271        | 0.030   | 0.5 | 0.2           | 0.9           |
| rs7997012      | 0.050   | 0.8 | 0.6           | 1.0           | rs4774585      | 0.059   | 1.4 | 1.0           | 1.9           | IU08.E2.02      | 0.037   | 8.4 | 1.1           | 62.8          |
| rs1805055      | 0.055   | 0.7 | 0.5           | 1.0           | rs4870061      | 0.061   | 1.4 | 1.0           | 1.9           | rs2230782       | 0.041   | 4.3 | 1.1           | 17.6          |
| rs660149       | 0.056   | 1.3 | 1.0           | 1.6           | rs7159713      | 0.061   | 0.7 | 0.5           | 1.0           | rs9341072       | 0.042   | 8.0 | 1.1           | 59.6          |
| rs9322336      | 0.061   | 1.3 | 1.0           | 1.7           | rs933271       | 0.065   | 0.7 | 0.5           | 1.0           | rs7158782       | 0.042   | 0.3 | 0.1           | 1.0           |
| rs165774       | 0.064   | 1.2 | 1.0           | 1.6           | rs1709182      | 0.066   | 0.7 | 0.5           | 1.0           | rs25532         | 0.045   | 2.5 | 1.0           | 6.2           |
| rs4646         | 0.065   | 0.8 | 0.6           | 1.0           | rs2347868      | 0.066   | 1.4 | 1.0           | 1.9           | rs9341070       | 0.047   | 7.6 | 1.0           | 56.2          |
| rs165599       | 0.067   | 0.8 | 0.6           | 1.0           | rs165815       | 0.066   | 0.7 | 0.5           | 1.0           | rs28566535      | 0.060   | 2.2 | 1.0           | 5.0           |
| rs944460       | 0.067   | 0.5 | 0.2           | 1.0           | rs11125744     | 0.078   | 0.7 | 0.5           | 1.0           | rs9341066       | 0.064   | 6.5 | 0.9           | 47.8          |
| rs4774585      | 0.080   | 1.3 | 1.0           | 1.7           | rs944460       | 0.084   | 0.5 | 0.2           | 1.1           | rs1065822       | 0.071   | 0.7 | 0.4           | 1.0           |
| rs9322335      | 0.081   | 1.3 | 1.0           | 1.7           | rs165599       | 0.087   | 0.8 | 0.5           | 1.0           | rs2097903       | 0.083   | 0.7 | 0.4           | 1.1           |
| rs4633         | 0.101   | 1.2 | 1.0           | 1.5           | rs4633         | 0.093   | 1.4 | 0.9           | 2.1           | rs20551         | 0.087   | 0.5 | 0.2           | 1.1           |
| rs4870061      | 0.107   | 1.2 | 1.0           | 1.6           | rs165774       | 0.097   | 1.3 | 1.0           | 1.8           | rs2347868       | 0.101   | 1.8 | 0.9           | 3.5           |
| rs2083389      | 0.119   | 1.2 | 0.9           | 1.6           | rs4646         | 0.097   | 0.8 | 0.6           | 1.1           | rs11571171      | 0.115   | 1.5 | 0.9           | 2.5           |
| rs1709182      | 0.119   | 0.8 | 0.6           | 1.1           | rs61753150     | 0.123   | 0.3 | 0.1           | 1.3           | rs3798565       | 0.120   | 0.6 | 0.3           | 1.2           |
| rs61753150     | 0.123   | 0.3 | 0.1           | 1.3           | rs6493497      | 0.143   | 0.7 | 0.5           | 1.1           | rs2272670       | 0.146   | 1.5 | 0.9           | 2.6           |
| rs1709181      | 0.136   | 0.8 | 0.6           | 1.1           | rs1256062      | 0.159   | 0.8 | 0.5           | 1.1           | rs3003917       | 0.155   | 0.4 | 0.1           | 1.5           |
| rs9567746      | 0.145   | 1.3 | 0.9           | 1.7           | rs2747648      | 0.174   | 0.6 | 0.3           | 1.3           | rs11125744      | 0.161   | 0.4 | 0.1           | 1.5           |
| rs165815       | 0.152   | 0.8 | 0.6           | 1.1           | rs3798577      | 0.184   | 1.3 | 0.9           | 1.8           | rs9340799       | 0.162   | 1.4 | 0.9           | 2.1           |
| rs1062577      | 0.176   | 0.7 | 0.4           | 1.2           | rs25532        | 0.186   | 0.7 | 0.5           | 1.1           | rs165774        | 0.177   | 1.4 | 0.9           | 2.2           |
| rs6909026      | 0.183   | 1.5 | 0.8           | 2.8           | rs1884049      | 0.189   | 1.2 | 0.9           | 1.7           | rs920418        | 0.192   | 0.8 | 0.5           | 1.2           |
| rs17737058     | 0.197   | 1.2 | 0.9           | 1.6           | rs9341004      | 0.210   | 1.3 | 0.9           | 1.9           | rs2008691       | 0.193   | 1.6 | 0.8           | 3.3           |
| rs731779       | 0.199   | 1.2 | 0.9           | 1.7           | rs3003917      | 0.210   | 1.2 | 0.9           | 1.7           | rs1008805       | 0.207   | 0.7 | 0.4           | 1.2           |
| rs2076546      | 0.202   | 0.8 | 0.5           | 1.2           | rs365602       | 0.222   | 0.7 | 0.5           | 1.2           | rs4646          | 0.222   | 0.6 | 0.3           | 1.3           |
| rs920418       | 0.210   | 0.9 | 0.7           | 1.1           | rs594242       | 0.224   | 0.8 | 0.6           | 1.1           | rs165599        | 0.231   | 0.7 | 0.4           | 1.2           |
| rs6493497      | 0.214   | 0.8 | 0.5           | 1.2           | rs1062577      | 0.234   | 0.7 | 0.4           | 1.2           | rs10140457      | 0.251   | 3.2 | 0.4           | 23.1          |
| rs3798565      | 0.215   | 0.8 | 0.7           | 1.1           | rs6295         | 0.234   | 1.3 | 0.9           | 1.9           | rs752760        | 0.252   | 1.2 | 0.9           | 1.8           |
| rs365602       | 0.216   | 0.8 | 0.5           | 1.2           | rs6909026      | 0.248   | 1.5 | 0.8           | 2.9           | rs6909026       | 0.253   | 3.2 | 0.4           | 23.0          |
| rs7978237      | 0.220   | 1.2 | 0.9           | 1.7           | rs11963577     | 0.250   | 3.2 | 0.4           | 23.1          | rs3798758       | 0.262   | 3.1 | 0.4           | 22.5          |
| rs4646310      | 0.225   | 0.8 | 0.6           | 1.1           | rs3020377      | 0.251   | 1.2 | 0.9           | 1.7           | rs516693        | 0.270   | 1.9 | 0.6           | 6.0           |
| rs7116336      | 0.248   | 0.8 | 0.5           | 1.2           | rs7978237      | 0.259   | 1.2 | 0.9           | 1.8           | rs2347869       | 0.275   | 1.3 | 0.8           | 1.9           |
| rs11963577     | 0.250   | 3.2 | 0.4           | 23.1          | rs10140457     | 0.260   | 0.6 | 0.3           | 1.4           | rs7116336       | 0.310   | 0.4 | 0.0           | 2.6           |
| rs2747648      | 0.252   | 0.7 | 0.3           | 1.4           | rs1256064      | 0.269   | 0.8 | 0.5           | 1.2           | rs9340835       | 0.311   | 0.7 | 0.4           | 1.3           |
| rs1008805      | 0.253   | 0.9 | 0.7           | 1.1           | rs4986934      | 0.270   | 1.4 | 0.8           | 2.4           | rs4633          | 0.330   | 1.2 | 0.8           | 1.7           |
| rs4986934      | 0.270   | 1.4 | 0.8           | 2.4           | rs4646310      | 0.284   | 0.8 | 0.6           | 1.2           | rs1042838       | 0.334   | 0.5 | 0.1           | 2.0           |
| rs2347869      | 0.271   | 1.1 | 0.9           | 1.4           | rs2076546      | 0.286   | 0.8 | 0.5           | 1.2           | rs4775936       | 0.344   | 1.2 | 0.8           | 1.8           |
| rs594242       | 0.275   | 0.8 | 0.6           | 1.1           | rs28757184     | 0.287   | 0.6 | 0.3           | 1.5           | rs2229742       | 0.352   | 0.4 | 0.1           | 2.8           |
| rs1256062      | 0.276   | 0.8 | 0.6           | 1.2           | rs9322336      | 0.318   | 1.2 | 0.8           | 1.7           | rs3853250       | 0.355   | 0.8 | 0.6           | 1.2           |
| rs28757184     | 0.287   | 0.6 | 0.3           | 1.5           | rs9436         | 0.329   | 0.8 | 0.6           | 1.2           | rs1062033       | 0.361   | 1.2 | 0.8           | 1.8           |
| rs9340799      | 0.304   | 1.1 | 0.9           | 1.4           | rs7116336      | 0.337   | 0.8 | 0.5           | 1.3           | rs9322338       | 0.367   | 1.5 | 0.6           | 3.7           |

|             |       |     |     |     |             |       |     |     |     |            |       |     |     |      |
|-------------|-------|-----|-----|-----|-------------|-------|-----|-----|-----|------------|-------|-----|-----|------|
| rs16965628  | 0.307 | 0.8 | 0.5 | 1.2 | rs518162    | 0.339 | 1.2 | 0.8 | 1.8 | rs1805055  | 0.369 | 0.8 | 0.4 | 1.4  |
| rs3020377   | 0.309 | 1.1 | 0.9 | 1.4 | rs9322335   | 0.340 | 1.2 | 0.8 | 1.6 | rs4646310  | 0.371 | 0.6 | 0.2 | 1.7  |
| rs2097903   | 0.327 | 0.9 | 0.7 | 1.1 | rs1073093   | 0.354 | 0.7 | 0.3 | 1.5 | rs4870056  | 0.374 | 0.8 | 0.6 | 1.2  |
| rs9341004   | 0.329 | 1.2 | 0.8 | 1.7 | rs16965628  | 0.372 | 0.8 | 0.5 | 1.3 | rs3088092  | 0.385 | 2.4 | 0.3 | 17.3 |
| rs1065822   | 0.332 | 0.9 | 0.7 | 1.1 | rs750686    | 0.393 | 0.9 | 0.6 | 1.2 | rs2228480  | 0.401 | 0.7 | 0.2 | 1.8  |
| rs6930355   | 0.337 | 0.9 | 0.6 | 1.2 | rs4738079   | 0.403 | 0.8 | 0.5 | 1.3 | rs396221   | 0.405 | 1.2 | 0.8 | 1.8  |
| rs1073093   | 0.354 | 0.7 | 0.3 | 1.5 | rs1812730   | 0.405 | 0.9 | 0.6 | 1.2 | rs1884049  | 0.406 | 0.7 | 0.3 | 1.7  |
| rs3798577   | 0.358 | 1.1 | 0.9 | 1.4 | rs9340817   | 0.405 | 0.7 | 0.3 | 1.6 | rs4680     | 0.409 | 1.2 | 0.8 | 1.7  |
| rs752760    | 0.366 | 1.1 | 0.9 | 1.4 | rs506487    | 0.408 | 0.9 | 0.6 | 1.2 | rs749292   | 0.411 | 1.2 | 0.8 | 1.8  |
| rs4738079   | 0.372 | 0.8 | 0.5 | 1.3 | rs9567746   | 0.410 | 1.2 | 0.8 | 1.6 | rs6269     | 0.419 | 0.8 | 0.5 | 1.3  |
| rs1256064   | 0.383 | 0.9 | 0.6 | 1.2 | rs6930355   | 0.411 | 0.9 | 0.6 | 1.2 | rs7978237  | 0.424 | 1.4 | 0.6 | 3.6  |
| rs6295      | 0.386 | 1.1 | 0.9 | 1.4 | rs867443    | 0.416 | 1.1 | 0.8 | 1.6 | rs10046    | 0.436 | 1.2 | 0.8 | 1.7  |
| rs10140457  | 0.391 | 0.7 | 0.3 | 1.5 | rs920418    | 0.431 | 0.9 | 0.6 | 1.2 | rs6930355  | 0.442 | 0.6 | 0.2 | 2.0  |
| rs3853250   | 0.392 | 0.9 | 0.7 | 1.1 | rs516693    | 0.432 | 0.9 | 0.6 | 1.3 | rs9322331  | 0.445 | 1.2 | 0.8 | 1.9  |
| rs4680      | 0.399 | 1.1 | 0.9 | 1.4 | rs2176807   | 0.444 | 0.9 | 0.6 | 1.2 | rs6493497  | 0.455 | 1.7 | 0.4 | 6.9  |
| rs4775936   | 0.406 | 1.1 | 0.9 | 1.4 | rs500760    | 0.446 | 1.1 | 0.8 | 1.6 | rs518162   | 0.461 | 0.5 | 0.1 | 3.4  |
| rs1812730   | 0.407 | 0.9 | 0.7 | 1.1 | rs3020371   | 0.451 | 0.9 | 0.6 | 1.2 | rs9436     | 0.467 | 1.2 | 0.7 | 2.2  |
| rs9341070   | 0.407 | 1.5 | 0.5 | 4.4 | rs3798565   | 0.452 | 0.9 | 0.6 | 1.2 | rs3759811  | 0.485 | 1.2 | 0.8 | 1.8  |
| rs9340817   | 0.410 | 0.8 | 0.4 | 1.5 | rs2347869   | 0.454 | 1.1 | 0.8 | 1.6 | rs700518   | 0.496 | 1.1 | 0.8 | 1.7  |
| rs1062033   | 0.419 | 1.1 | 0.9 | 1.4 | rs2083389   | 0.471 | 1.1 | 0.8 | 1.6 | rs2289105  | 0.508 | 1.1 | 0.8 | 1.7  |
| rs506487    | 0.423 | 0.9 | 0.7 | 1.2 | rs1042838   | 0.486 | 1.1 | 0.8 | 1.6 | rs2414096  | 0.509 | 1.2 | 0.8 | 1.8  |
| rs1884049   | 0.426 | 1.1 | 0.9 | 1.5 | rs10459592  | 0.488 | 0.9 | 0.6 | 1.2 | rs9341004  | 0.524 | 0.5 | 0.1 | 3.8  |
| rs3020371   | 0.434 | 0.9 | 0.7 | 1.2 | rs1008805   | 0.496 | 0.9 | 0.6 | 1.2 | rs1380896  | 0.537 | 1.2 | 0.6 | 2.4  |
| rs9341066   | 0.435 | 1.2 | 0.8 | 1.9 | rs8006145   | 0.503 | 1.1 | 0.8 | 1.5 | rs660149   | 0.547 | 1.2 | 0.7 | 2.2  |
| rs11806980  | 0.437 | 0.8 | 0.5 | 1.4 | rs3731628   | 0.504 | 1.2 | 0.7 | 1.9 | rs365602   | 0.552 | 0.7 | 0.2 | 2.6  |
| rs749292    | 0.438 | 1.1 | 0.9 | 1.4 | rs3020376   | 0.507 | 0.9 | 0.6 | 1.3 | rs936308   | 0.567 | 1.2 | 0.6 | 2.5  |
| rs3798758   | 0.453 | 1.3 | 0.7 | 2.3 | rs4986938   | 0.521 | 1.1 | 0.8 | 1.5 | rs2033861  | 0.576 | 0.9 | 0.6 | 1.4  |
| rs28566535  | 0.455 | 1.1 | 0.8 | 1.6 | rs2274705   | 0.523 | 1.1 | 0.8 | 1.7 | rs3778610  | 0.589 | 1.3 | 0.5 | 3.6  |
| rs20551     | 0.457 | 0.9 | 0.7 | 1.2 | rs731779    | 0.525 | 1.1 | 0.8 | 1.6 | rs3020368  | 0.605 | 1.7 | 0.2 | 12.1 |
| rs4870056   | 0.472 | 0.9 | 0.7 | 1.2 | rs2982734   | 0.526 | 0.9 | 0.6 | 1.3 | rs7181886  | 0.614 | 1.3 | 0.4 | 4.2  |
| rs2274705   | 0.481 | 1.1 | 0.8 | 1.6 | rs9902709   | 0.534 | 1.1 | 0.8 | 1.6 | rs730154   | 0.614 | 0.8 | 0.3 | 1.9  |
| rs2982734   | 0.487 | 0.9 | 0.7 | 1.2 | rs2008691   | 0.534 | 0.9 | 0.6 | 1.3 | rs1709182  | 0.616 | 0.9 | 0.5 | 1.4  |
| rs11571171  | 0.496 | 1.1 | 0.8 | 1.4 | rs9322338   | 0.538 | 0.8 | 0.5 | 1.5 | rs2274705  | 0.620 | 1.3 | 0.5 | 3.5  |
| rs3731628   | 0.504 | 1.2 | 0.7 | 1.9 | rs2813543   | 0.549 | 0.9 | 0.7 | 1.3 | rs727479   | 0.621 | 0.9 | 0.5 | 1.4  |
| rs25532     | 0.507 | 0.9 | 0.6 | 1.3 | rs396221    | 0.552 | 0.9 | 0.6 | 1.3 | rs1952585  | 0.627 | 1.2 | 0.5 | 2.8  |
| rs750686    | 0.517 | 0.9 | 0.7 | 1.2 | rs9341066   | 0.564 | 1.2 | 0.7 | 1.9 | rs1812730  | 0.628 | 0.9 | 0.6 | 1.4  |
| rs518162    | 0.521 | 1.1 | 0.8 | 1.6 | rs4680      | 0.572 | 1.1 | 0.8 | 1.6 | rs3020371  | 0.632 | 0.9 | 0.5 | 1.5  |
| rs2229840   | 0.522 | 1.1 | 0.8 | 1.5 | rs3798758   | 0.579 | 1.2 | 0.6 | 2.3 | rs9340958  | 0.634 | 1.6 | 0.2 | 11.7 |
| rs6269      | 0.530 | 0.9 | 0.7 | 1.2 | rs1256049   | 0.579 | 0.8 | 0.4 | 1.6 | rs2982734  | 0.635 | 0.9 | 0.5 | 1.5  |
| rs9902709   | 0.531 | 1.1 | 0.8 | 1.5 | rs11806980  | 0.581 | 0.8 | 0.5 | 1.5 | rs7997012  | 0.645 | 0.9 | 0.6 | 1.4  |
| rs3003917   | 0.565 | 1.1 | 0.8 | 1.5 | CP.ESR1.02. | 0.586 | 1.3 | 0.5 | 3.6 | rs2747648  | 0.649 | 1.6 | 0.2 | 11.4 |
| rs867443    | 0.572 | 1.1 | 0.8 | 1.4 | rs6094752   | 0.606 | 0.9 | 0.5 | 1.5 | rs9340817  | 0.650 | 0.6 | 0.1 | 4.5  |
| rs1256049   | 0.579 | 0.8 | 0.4 | 1.6 | rs936308    | 0.622 | 0.9 | 0.7 | 1.3 | rs2077647  | 0.650 | 1.1 | 0.8 | 1.6  |
| rs7181886   | 0.583 | 1.1 | 0.8 | 1.6 | rs3853250   | 0.627 | 0.9 | 0.6 | 1.3 | rs4774585  | 0.660 | 1.2 | 0.6 | 2.5  |
| CP.ESR1.02. | 0.586 | 1.3 | 0.5 | 3.6 | rs749292    | 0.640 | 1.1 | 0.8 | 1.6 | rs17766755 | 0.662 | 1.1 | 0.7 | 1.9  |
| rs10459592  | 0.594 | 0.9 | 0.8 | 1.2 | rs1062033   | 0.643 | 1.1 | 0.8 | 1.5 | rs1256062  | 0.664 | 1.2 | 0.5 | 3.0  |
| rs9322331   | 0.596 | 1.1 | 0.8 | 1.3 | rs7181886   | 0.648 | 1.1 | 0.7 | 1.7 | rs2176807  | 0.675 | 1.1 | 0.7 | 1.6  |
| rs17766755  | 0.614 | 1.1 | 0.8 | 1.4 | rs4775936   | 0.649 | 1.1 | 0.8 | 1.5 | rs506487   | 0.680 | 0.9 | 0.5 | 1.5  |
| rs516693    | 0.622 | 0.9 | 0.6 | 1.3 | rs9340799   | 0.650 | 1.1 | 0.8 | 1.5 | rs6094752  | 0.704 | 1.5 | 0.2 | 10.6 |
| rs3759811   | 0.636 | 1.1 | 0.8 | 1.4 | rs1328685   | 0.652 | 1.1 | 0.7 | 1.6 | rs3020377  | 0.709 | 1.1 | 0.7 | 1.7  |
| rs9436      | 0.638 | 0.9 | 0.7 | 1.2 | rs1256059   | 0.652 | 1.1 | 0.8 | 1.5 | rs1709181  | 0.723 | 0.9 | 0.6 | 1.4  |
| rs2229742   | 0.639 | 0.9 | 0.6 | 1.3 | rs2271933   | 0.677 | 0.9 | 0.7 | 1.3 | rs500760   | 0.724 | 0.9 | 0.5 | 1.7  |
| rs3020376   | 0.639 | 0.9 | 0.7 | 1.2 | rs2289105   | 0.689 | 0.9 | 0.6 | 1.3 | rs165815   | 0.728 | 1.1 | 0.5 | 2.4  |
| rs727479    | 0.653 | 0.9 | 0.8 | 1.2 | rs17766755  | 0.689 | 1.1 | 0.8 | 1.5 | rs9479188  | 0.733 | 0.9 | 0.4 | 2.1  |
| rs500760    | 0.660 | 1.1 | 0.8 | 1.4 | rs2302427   | 0.690 | 1.1 | 0.7 | 1.7 | rs2274639  | 0.736 | 0.8 | 0.3 | 2.6  |

|            |       |     |     |     |            |       |     |     |     |            |       |             |     |     |
|------------|-------|-----|-----|-----|------------|-------|-----|-----|-----|------------|-------|-------------|-----|-----|
| rs2272670  | 0.667 | 1.1 | 0.8 | 1.4 | rs2230782  | 0.694 | 0.9 | 0.6 | 1.5 | rs4818     | 0.746 | 0.9         | 0.6 | 1.5 |
| rs2813543  | 0.667 | 0.9 | 0.7 | 1.2 | rs3020410  | 0.707 | 0.9 | 0.7 | 1.3 | rs944045   | 0.764 | 1.2         | 0.4 | 3.2 |
| rs10046    | 0.674 | 1.1 | 0.8 | 1.3 | rs944045   | 0.714 | 1.1 | 0.7 | 1.7 | rs8006145  | 0.777 | 0.9         | 0.5 | 1.7 |
| rs8006145  | 0.681 | 1.1 | 0.8 | 1.4 | rs9340958  | 0.714 | 0.9 | 0.6 | 1.5 | rs2653349  | 0.778 | 1.1         | 0.5 | 2.8 |
| rs6094752  | 0.682 | 0.9 | 0.5 | 1.5 | rs752760   | 0.716 | 1.1 | 0.7 | 1.6 | rs9340941  | 0.789 | 0.9         | 0.5 | 1.6 |
| rs944045   | 0.685 | 1.1 | 0.8 | 1.5 | rs6920483  | 0.721 | 1.1 | 0.5 | 2.5 | rs3020450  | 0.792 | 1.1         | 0.6 | 1.9 |
| rs2414096  | 0.686 | 1.1 | 0.8 | 1.4 | rs837935   | 0.724 | 1.1 | 0.8 | 1.5 | rs9902709  | 0.794 | 1.1         | 0.4 | 3.1 |
| rs700518   | 0.690 | 1.0 | 0.8 | 1.3 | rs1256031  | 0.742 | 0.9 | 0.7 | 1.3 | rs4986938  | 0.811 | 0.9         | 0.6 | 1.5 |
| rs1256059  | 0.693 | 1.0 | 0.8 | 1.3 | rs2234693  | 0.747 | 0.9 | 0.6 | 1.4 | rs2271933  | 0.822 | 1.1         | 0.7 | 1.6 |
| rs6920483  | 0.721 | 1.1 | 0.5 | 2.5 | rs41513044 | 0.754 | 0.8 | 0.3 | 2.6 | rs867443   | 0.828 | 0.9         | 0.5 | 1.8 |
| rs4986938  | 0.732 | 1.0 | 0.8 | 1.3 | rs867239   | 0.765 | 1.1 | 0.6 | 2.2 | rs594242   | 0.829 | 0.9         | 0.4 | 2.1 |
| rs1952585  | 0.733 | 1.1 | 0.8 | 1.4 | CP.ESR1.04 | 0.766 | 0.7 | 0.1 | 5.3 | rs4870061  | 0.831 | 1.1         | 0.5 | 2.2 |
| rs2234693  | 0.753 | 1.0 | 0.8 | 1.2 | rs6269     | 0.769 | 1.0 | 0.7 | 1.3 | rs140700   | 0.843 | 1.2         | 0.2 | 8.8 |
| rs41513044 | 0.754 | 0.8 | 0.3 | 2.6 | rs4870056  | 0.769 | 0.9 | 0.6 | 1.4 | rs2234693  | 0.845 | 1.0         | 0.7 | 1.4 |
| rs867239   | 0.765 | 1.1 | 0.6 | 2.2 | rs727479   | 0.770 | 1.0 | 0.7 | 1.3 | rs1256059  | 0.863 | 1.0         | 0.7 | 1.6 |
| CP.ESR1.04 | 0.766 | 0.7 | 0.1 | 5.3 | rs6306     | 0.777 | 1.1 | 0.7 | 1.7 | rs6295     | 0.866 | 1.0         | 0.7 | 1.5 |
| rs3020450  | 0.767 | 1.0 | 0.8 | 1.3 | rs17737058 | 0.784 | 1.0 | 0.8 | 1.5 | rs10459592 | 0.874 | 1.0         | 0.7 | 1.4 |
| rs730154   | 0.773 | 1.0 | 0.7 | 1.3 | rs6311     | 0.785 | 1.0 | 0.7 | 1.3 | rs3742278  | 0.886 | 0.9         | 0.4 | 2.3 |
| rs1042838  | 0.777 | 1.0 | 0.8 | 1.4 | rs9340941  | 0.789 | 0.9 | 0.5 | 1.6 | rs3798577  | 0.911 | 1.0         | 0.7 | 1.5 |
| rs837935   | 0.777 | 1.0 | 0.8 | 1.3 | rs9341070  | 0.795 | 1.2 | 0.3 | 4.9 | rs6311     | 0.914 | 1.0         | 0.6 | 1.5 |
| rs2274639  | 0.787 | 1.0 | 0.7 | 1.3 | rs2228591  | 0.796 | 1.1 | 0.6 | 1.9 | rs2813543  | 0.916 | 1.0         | 0.6 | 1.9 |
| rs2302427  | 0.789 | 1.1 | 0.7 | 1.7 | rs25531    | 0.806 | 1.1 | 0.5 | 2.4 | rs6313     | 0.923 | 1.0         | 0.7 | 1.6 |
| rs9340941  | 0.789 | 1.0 | 0.7 | 1.3 | rs2077647  | 0.809 | 1.0 | 0.7 | 1.4 | rs750686   | 0.950 | 1.0         | 0.6 | 1.6 |
| rs9340958  | 0.795 | 0.9 | 0.6 | 1.5 | rs1380896  | 0.814 | 1.0 | 0.7 | 1.4 | rs837935   | 0.952 | 1.0         | 0.6 | 1.7 |
| rs4818     | 0.798 | 1.0 | 0.8 | 1.2 | rs3020450  | 0.818 | 1.0 | 0.8 | 1.4 | rs1256064  | 0.973 | 1.0         | 0.5 | 2.0 |
| rs2176807  | 0.805 | 1.0 | 0.8 | 1.2 | rs9322331  | 0.821 | 1.0 | 0.8 | 1.4 | rs3020376  | 0.976 | 1.0         | 0.6 | 1.6 |
| rs25531    | 0.806 | 1.1 | 0.5 | 2.4 | rs2229742  | 0.829 | 1.0 | 0.6 | 1.4 | rs2076546  | 0.992 | 0.937534919 | 0.0 | Inf |
| rs3020368  | 0.807 | 1.1 | 0.7 | 1.6 | rs6308     | 0.835 | 0.8 | 0.1 | 5.8 | rs11849538 | 0.992 | 8490759930  | 0.0 | Inf |
| rs6311     | 0.808 | 1.0 | 0.8 | 1.2 | rs2272670  | 0.835 | 1.0 | 0.7 | 1.3 | rs944460   | 0.993 | 0617216293  | 0.0 | Inf |
| rs1256031  | 0.832 | 1.0 | 0.8 | 1.2 | rs1952585  | 0.836 | 1.0 | 0.7 | 1.5 | rs1062577  | 0.993 | 5756945663  | 0.0 | Inf |
| rs2033861  | 0.832 | 1.0 | 0.8 | 1.2 | rs2653349  | 0.838 | 1.0 | 0.7 | 1.4 | rs8003490  | 0.993 | 0455454994  | 0.0 | Inf |
| rs6306     | 0.834 | 1.0 | 0.7 | 1.7 | rs2274639  | 0.849 | 1.0 | 0.7 | 1.4 | rs2302427  | 0.993 | 8220051977  | 0.0 | Inf |
| rs6308     | 0.835 | 0.8 | 0.1 | 5.8 | rs3778610  | 0.851 | 0.9 | 0.5 | 1.7 | CP.ESR1.0  | 0.993 | 4810983486  | 0.0 | Inf |
| rs1328685  | 0.835 | 1.0 | 0.7 | 1.5 | rs2033861  | 0.851 | 1.0 | 0.7 | 1.5 | rs926848   | 0.993 | 7851456375  | 0.0 | Inf |
| rs936308   | 0.838 | 1.0 | 0.7 | 1.3 | IU08.E2.02 | 0.853 | 1.0 | 0.6 | 1.5 | rs4738079  | 0.993 | 0906557665  | 0.0 | Inf |
| rs3088092  | 0.846 | 1.1 | 0.6 | 1.7 | rs28566535 | 0.855 | 1.0 | 0.7 | 1.6 | rs11806980 | 0.994 | 5075880478  | 0.0 | Inf |
| rs9479188  | 0.855 | 1.0 | 0.7 | 1.3 | rs3020368  | 0.869 | 1.0 | 0.7 | 1.6 | rs1328685  | 0.994 | 0855036210  | 0.0 | Inf |
| rs2271933  | 0.864 | 1.0 | 0.8 | 1.2 | rs8003490  | 0.876 | 1.0 | 0.7 | 1.6 | rs16965628 | 0.994 | 7578065449  | 0.0 | Inf |
| rs140700   | 0.878 | 1.0 | 0.7 | 1.6 | rs1065822  | 0.882 | 1.0 | 0.7 | 1.5 | rs6306     | 0.994 | 0850917424  | 0.0 | Inf |
| rs2289105  | 0.890 | 1.0 | 0.8 | 1.3 | rs926848   | 0.886 | 1.0 | 0.6 | 1.9 | rs9341077  | 0.994 | 0375086195  | 0.0 | Inf |
| rs9322338  | 0.894 | 1.0 | 0.6 | 1.5 | rs4818     | 0.900 | 1.0 | 0.7 | 1.4 | rs2228591  | 0.995 | 3630379558  | 0.0 | Inf |
| rs2077647  | 0.901 | 1.0 | 0.8 | 1.3 | rs2229840  | 0.903 | 1.0 | 0.7 | 1.5 | rs1256031  | 0.998 | 1.0         | 0.7 | 1.5 |
| rs2008691  | 0.916 | 1.0 | 0.7 | 1.3 | rs140700   | 0.903 | 1.0 | 0.7 | 1.6 | rs3731628  | NA    | NA          | NA  | NA  |
| rs6313     | 0.925 | 1.0 | 0.8 | 1.3 | rs730154   | 0.903 | 1.0 | 0.7 | 1.4 | rs1804645  | NA    | NA          | NA  | NA  |
| rs3020410  | 0.929 | 1.0 | 0.7 | 1.4 | rs3759811  | 0.909 | 1.0 | 0.7 | 1.5 | rs1800046  | NA    | NA          | NA  | NA  |
| rs2653349  | 0.929 | 1.0 | 0.7 | 1.3 | rs2097903  | 0.927 | 1.0 | 0.7 | 1.5 | CP.ESR1.0  | NA    | NA          | NA  | NA  |
| rs2228591  | 0.932 | 1.0 | 0.6 | 1.7 | rs1804645  | 0.937 | 1.0 | 0.6 | 1.9 | CP.ESR1.0  | NA    | NA          | NA  | NA  |
| rs396221   | 0.936 | 1.0 | 0.8 | 1.3 | IU08.E2.01 | 0.938 | 0.9 | 0.1 | 6.6 | rs11963577 | NA    | NA          | NA  | NA  |
| rs1804645  | 0.937 | 1.0 | 0.6 | 1.9 | rs9479188  | 0.940 | 1.0 | 0.7 | 1.4 | rs867239   | NA    | NA          | NA  | NA  |
| IU08.E2.01 | 0.938 | 0.9 | 0.1 | 6.6 | rs3742278  | 0.942 | 1.0 | 0.7 | 1.5 | rs6920483  | NA    | NA          | NA  | NA  |
| rs3778610  | 0.952 | 1.0 | 0.7 | 1.6 | rs10046    | 0.949 | 1.0 | 0.7 | 1.4 | rs4986934  | NA    | NA          | NA  | NA  |
| rs1380896  | 0.955 | 1.0 | 0.8 | 1.3 | rs6313     | 0.953 | 1.0 | 0.7 | 1.4 | rs9322348  | NA    | NA          | NA  | NA  |
| rs8003490  | 0.971 | 1.0 | 0.7 | 1.6 | rs3088092  | 0.966 | 1.0 | 0.6 | 1.7 | rs6308     | NA    | NA          | NA  | NA  |
| rs2230782  | 0.979 | 1.0 | 0.6 | 1.6 | rs2414096  | 0.973 | 1.0 | 0.7 | 1.5 | IU08.E2.01 | NA    | NA          | NA  | NA  |
| rs926848   | 0.980 | 1.0 | 0.6 | 1.8 | rs700518   | 0.990 | 1.0 | 0.7 | 1.4 | rs1256049  | NA    | NA          | NA  | NA  |

|            |       |            |     |     |             |       |            |     |     |            |    |    |    |    |
|------------|-------|------------|-----|-----|-------------|-------|------------|-----|-----|------------|----|----|----|----|
| IU08.E2.02 | 0.982 | 1.0        | 0.6 | 1.6 | CP.ESR1.01. | 0.992 | 7499396604 | 0.0 | Inf | rs28757184 | NA | NA | NA | NA |
| rs3742278  | 0.994 | 1.0        | 0.7 | 1.4 | rs1800046   | 0.994 | 9157807998 | 0.0 | Inf | rs1073093  | NA | NA | NA | NA |
| rs1800046  | 0.994 | 9157807998 | 0.0 | Inf | rs11571171  | 0.994 | 1.0        | 0.7 | 1.4 | rs61753150 | NA | NA | NA | NA |
| CP.ESR1.01 | 0.994 | 1363986378 | 0.0 | Inf | rs20551     | 0.999 | 1.0        | 0.7 | 1.4 | rs25531    | NA | NA | NA | NA |
| rs9322348  | NA    | NA         | NA  | NA  | rs9322348   | NA    | NA         | NA  | NA  | rs41513044 | NA | NA | NA | NA |
