# Supplementary material
Source: PubMed Central journal article supplement (PMC3646626)
Supplement: NIHMS462885-supplement-10549_2013_2504_MOESM6_ESM.pdf [file NIHMS462885-supplement-10549_2013_2504_MOESM6_ESM.pdf]

**Supplementary Table 5.** Multivariate analysis of associations between candidate gene variants and treatment discontinuation because of musculoskeletal toxicity, adjusted for age and AI medication. Results for additive, dominant, and recessive statistical models are given. CI: confidence interval; HR: hazard ratio; SNP: single nucleotide polymorphism.

Discontinued Because of AIMSS – Analyses adjusted for Age > 55 + AI medication + Prior taxane

| Additive Model |         |     |               |               | Dominant Model |         |     |               |               | Recessive Model |         |      |               |               |
|----------------|---------|-----|---------------|---------------|----------------|---------|-----|---------------|---------------|-----------------|---------|------|---------------|---------------|
| SNP            | P-value | HR  | Lower 0.95 CI | Upper 0.95 CI | SNP            | P-value | HR  | Lower 0.95 CI | Upper 0.95 CI | SNP             | P-value | HR   | Lower 0.95 CI | Upper 0.95 CI |
| rs2347868      | 0.005   | 1.6 | 1.1           | 2.1           | rs9340835      | 0.003   | 0.6 | 0.4           | 0.8           | rs9322336       | 0.001   | 3.2  | 1.6           | 6.2           |
| rs2369049      | 0.015   | 0.6 | 0.4           | 0.9           | rs7997012      | 0.008   | 0.6 | 0.4           | 0.9           | rs9322335       | 0.002   | 2.6  | 1.4           | 4.7           |
| rs9340835      | 0.019   | 0.7 | 0.5           | 0.9           | rs1805055      | 0.021   | 0.5 | 0.2           | 0.9           | rs731779        | 0.002   | 4.2  | 1.7           | 10.5          |
| rs2296972      | 0.023   | 0.7 | 0.6           | 1.0           | rs9341004      | 0.027   | 1.6 | 1.1           | 2.4           | rs9567746       | 0.002   | 4.1  | 1.7           | 10.3          |
| rs7997012      | 0.025   | 0.7 | 0.6           | 1.0           | rs2347868      | 0.029   | 1.5 | 1.0           | 2.2           | rs1008.E2.02    | 0.005   | 19.2 | 2.5           | 148.8         |
| rs9567746      | 0.027   | 1.5 | 1.0           | 2.1           | rs2369049      | 0.034   | 0.6 | 0.4           | 1.0           | rs17737058      | 0.005   | 2.6  | 1.3           | 5.0           |
| rs11849538     | 0.029   | 0.6 | 0.4           | 1.0           | rs4870061      | 0.035   | 1.5 | 1.0           | 2.2           | rs2347868       | 0.006   | 2.6  | 1.3           | 5.2           |
| rs4870061      | 0.032   | 1.4 | 1.0           | 1.8           | rs4646         | 0.036   | 0.7 | 0.5           | 1.0           | rs2296972       | 0.008   | 0.4  | 0.2           | 0.8           |
| rs731779       | 0.032   | 1.5 | 1.0           | 2.1           | rs1709181      | 0.038   | 0.6 | 0.4           | 1.0           | rs28566535      | 0.008   | 3.1  | 1.3           | 7.0           |
| rs9322335      | 0.034   | 1.4 | 1.0           | 1.9           | rs9341077      | 0.041   | 0.4 | 0.1           | 1.0           | rs9341066       | 0.020   | 10.7 | 1.4           | 79.5          |
| rs9341077      | 0.041   | 0.4 | 0.1           | 1.0           | rs2228480      | 0.054   | 0.7 | 0.4           | 1.0           | rs752760        | 0.028   | 1.6  | 1.1           | 2.5           |
| rs4646         | 0.047   | 0.7 | 0.5           | 1.0           | rs1709182      | 0.054   | 0.7 | 0.5           | 1.0           | rs2230782       | 0.040   | 4.5  | 1.1           | 18.8          |
| rs9341004      | 0.048   | 1.5 | 1.0           | 2.1           | rs11849538     | 0.057   | 0.6 | 0.4           | 1.0           | rs25532         | 0.042   | 2.6  | 1.0           | 6.7           |
| rs6909026      | 0.051   | 1.9 | 1.0           | 3.6           | rs3003917      | 0.073   | 1.4 | 1.0           | 2.1           | rs933271        | 0.049   | 0.4  | 0.2           | 1.0           |
| rs933271       | 0.053   | 0.8 | 0.6           | 1.0           | rs518162       | 0.074   | 1.5 | 1.0           | 2.3           | rs2083389       | 0.053   | 2.0  | 1.0           | 4.0           |
| rs28566535     | 0.065   | 1.4 | 1.0           | 2.0           | rs1884049      | 0.077   | 1.4 | 1.0           | 2.0           | rs516693        | 0.065   | 3.0  | 0.9           | 9.5           |
| rs9322336      | 0.075   | 1.3 | 1.0           | 1.8           | rs6909026      | 0.086   | 1.9 | 0.9           | 3.9           | rs7159713       | 0.073   | 0.3  | 0.1           | 1.1           |
| rs2228480      | 0.079   | 0.7 | 0.5           | 1.0           | rs2747648      | 0.091   | 0.4 | 0.1           | 1.2           | rs2369049       | 0.073   | 0.3  | 0.1           | 1.1           |
| rs3020377      | 0.082   | 1.3 | 1.0           | 1.6           | rs165774       | 0.093   | 1.4 | 0.9           | 2.0           | rs1008805       | 0.079   | 0.5  | 0.3           | 1.1           |
| rs1805055      | 0.082   | 0.7 | 0.5           | 1.0           | rs660149       | 0.095   | 1.4 | 0.9           | 2.0           | rs1065822       | 0.080   | 0.6  | 0.4           | 1.1           |
| rs4646310      | 0.084   | 0.7 | 0.5           | 1.0           | rs165599       | 0.096   | 0.7 | 0.5           | 1.1           | rs2097903       | 0.081   | 0.6  | 0.4           | 1.1           |
| rs660149       | 0.086   | 1.3 | 1.0           | 1.7           | rs3020377      | 0.098   | 1.4 | 0.9           | 2.1           | rs2272670       | 0.100   | 1.7  | 0.9           | 3.0           |
| rs2747648      | 0.088   | 0.4 | 0.1           | 1.2           | rs9567746      | 0.110   | 1.4 | 0.9           | 2.0           | rs3020410       | 0.114   | 2.6  | 0.8           | 8.3           |
| rs7158782      | 0.096   | 0.8 | 0.5           | 1.1           | rs4633         | 0.113   | 1.4 | 0.9           | 2.3           | rs2008691       | 0.115   | 1.9  | 0.9           | 4.0           |
| rs165599       | 0.110   | 0.8 | 0.6           | 1.1           | rs594242       | 0.127   | 0.7 | 0.5           | 1.1           | rs6909026       | 0.126   | 4.7  | 0.6           | 34.8          |
| rs7159713      | 0.112   | 0.8 | 0.5           | 1.1           | rs6295         | 0.129   | 1.4 | 0.9           | 2.2           | rs10140457      | 0.129   | 4.7  | 0.6           | 34.3          |
| rs365602       | 0.127   | 0.7 | 0.4           | 1.1           | rs165815       | 0.131   | 0.7 | 0.5           | 1.1           | rs1158782       | 0.134   | 0.4  | 0.1           | 1.3           |
| rs11963577     | 0.131   | 4.6 | 0.6           | 33.9          | rs11963577     | 0.131   | 4.6 | 0.6           | 33.9          | rs3798758       | 0.138   | 4.5  | 0.6           | 33.0          |
| rs61753150     | 0.136   | 0.2 | 0.0           | 1.6           | rs731779       | 0.132   | 1.3 | 0.9           | 2.0           | rs2229840       | 0.144   | 2.4  | 0.7           | 7.5           |
| rs1008805      | 0.145   | 0.8 | 0.6           | 1.1           | rs4646310      | 0.134   | 0.7 | 0.5           | 1.1           | rs9340799       | 0.163   | 1.4  | 0.9           | 2.4           |
| rs1884049      | 0.150   | 1.2 | 0.9           | 1.7           | rs61753150     | 0.136   | 0.2 | 0.0           | 1.6           | rs9322338       | 0.187   | 1.8  | 0.7           | 4.6           |
| rs2347869      | 0.152   | 1.2 | 0.9           | 1.6           | rs365602       | 0.151   | 0.7 | 0.4           | 1.2           | rs4646310       | 0.190   | 0.4  | 0.1           | 1.6           |
| rs1709182      | 0.155   | 0.8 | 0.6           | 1.1           | rs3798577      | 0.169   | 1.3 | 0.9           | 2.1           | rs3088092       | 0.195   | 3.7  | 0.5           | 27.0          |
| rs3798577      | 0.173   | 1.2 | 0.9           | 1.5           | rs7158782      | 0.182   | 0.8 | 0.5           | 1.1           | rs11571171      | 0.197   | 1.5  | 0.8           | 2.6           |
| rs518162       | 0.173   | 1.3 | 0.9           | 1.9           | rs1256062      | 0.183   | 0.7 | 0.5           | 1.2           | rs2347869       | 0.217   | 1.3  | 0.8           | 2.1           |
| rs944460       | 0.180   | 0.6 | 0.3           | 1.3           | rs933271       | 0.183   | 0.8 | 0.5           | 1.1           | rs20551         | 0.223   | 0.6  | 0.3           | 1.4           |
| rs594242       | 0.189   | 0.8 | 0.6           | 1.1           | rs506487       | 0.195   | 0.8 | 0.5           | 1.1           | rs727479        | 0.247   | 0.7  | 0.4           | 1.3           |
| rs506487       | 0.191   | 0.8 | 0.6           | 1.1           | rs2228591      | 0.198   | 1.4 | 0.8           | 2.5           | rs7181886       | 0.265   | 1.9  | 0.6           | 6.1           |
| rs7181886      | 0.200   | 1.3 | 0.9           | 2.0           | rs2296972      | 0.206   | 0.8 | 0.5           | 1.1           | rs6295          | 0.266   | 0.8  | 0.5           | 1.2           |
| rs1062577      | 0.210   | 0.7 | 0.4           | 1.2           | rs2813543      | 0.223   | 0.8 | 0.5           | 1.2           | rs4870061       | 0.266   | 1.5  | 0.7           | 3.1           |
| rs3003917      | 0.220   | 1.2 | 0.9           | 1.7           | rs4774585      | 0.223   | 1.3 | 0.9           | 1.9           | rs1380896       | 0.271   | 1.5  | 0.7           | 3.1           |
| rs165774       | 0.226   | 1.2 | 0.9           | 1.5           | rs1073093      | 0.228   | 0.6 | 0.2           | 1.4           | rs3020377       | 0.276   | 1.3  | 0.8           | 2.2           |
| rs1073093      | 0.228   | 0.6 | 0.2           | 1.4           | rs944460       | 0.238   | 0.6 | 0.3           | 1.4           | rs6269          | 0.286   | 0.7  | 0.4           | 1.3           |
| rs165815       | 0.228   | 0.8 | 0.6           | 1.1           | rs28566535     | 0.242   | 1.3 | 0.8           | 2.0           | rs6493497       | 0.293   | 2.1  | 0.5           | 8.7           |
| rs752760       | 0.228   | 1.2 | 0.9           | 1.6           | rs9322335      | 0.248   | 1.2 | 0.9           | 1.8           | rs11125744      | 0.300   | 0.5  | 0.1           | 1.9           |
| rs2097903      | 0.245   | 0.9 | 0.7           | 1.1           | rs2347869      | 0.262   | 1.3 | 0.8           | 1.9           | rs9902709       | 0.320   | 1.7  | 0.6           | 4.6           |
| rs2813543      | 0.245   | 0.8 | 0.6           | 1.1           | rs1062577      | 0.265   | 0.7 | 0.4           | 1.3           | rs3798565       | 0.330   | 0.7  | 0.3           | 1.4           |
| rs16965628     | 0.248   | 0.7 | 0.4           | 1.2           | rs25532        | 0.275   | 0.8 | 0.5           | 1.2           | rs936308        | 0.332   | 1.5  | 0.7           | 3.1           |
| rs4774585      | 0.252   | 1.2 | 0.9           | 1.7           | rs7181886      | 0.277   | 1.3 | 0.8           | 2.1           | rs3020368       | 0.347   | 2.6  | 0.4           | 19.0          |
| rs1709181      | 0.253   | 0.8 | 0.6           | 1.1           | rs16965628     | 0.285   | 0.7 | 0.4           | 1.3           | rs3003917       | 0.350   | 0.5  | 0.1           | 2.1           |
| rs4633         | 0.276   | 1.2 | 0.9           | 1.5           | rs730154       | 0.287   | 1.3 | 0.8           | 1.9           | rs396221        | 0.356   | 1.2  | 0.8           | 2.0           |
| rs2228591      | 0.291   | 1.3 | 0.8           | 2.3           | rs7159713      | 0.287   | 0.8 | 0.5           | 1.2           | rs365602        | 0.360   | 0.4  | 0.1           | 2.9           |
| rs1065822      | 0.302   | 0.9 | 0.7           | 1.1           | rs10140457     | 0.319   | 0.6 | 0.3           | 1.6           | rs660149        | 0.363   | 1.4  | 0.7           | 2.6           |
| rs9341066      | 0.305   | 1.3 | 0.8           | 2.2           | rs1256064      | 0.328   | 0.8 | 0.5           | 1.2           | rs9340958       | 0.378   | 2.4  | 0.3           | 17.8          |
| rs9340799      | 0.310   | 1.2 | 0.9           | 1.5           | rs25531        | 0.337   | 1.5 | 0.7           | 3.2           | rs1256031       | 0.394   | 1.2  | 0.8           | 1.9           |
| rs3020368      | 0.313   | 1.3 | 0.8           | 2.0           | rs9479188      | 0.343   | 1.2 | 0.8           | 1.8           | rs3798577       | 0.400   | 1.2  | 0.8           | 1.8           |

|                |       |     |     |      |                |       |     |     |      |            |       |     |     |      |
|----------------|-------|-----|-----|------|----------------|-------|-----|-----|------|------------|-------|-----|-----|------|
| rs1256062      | 0.321 | 0.8 | 0.6 | 1.2  | rs920418       | 0.346 | 0.8 | 0.6 | 1.2  | rs2271933  | 0.409 | 1.2 | 0.8 | 2.0  |
| rs7116336      | 0.329 | 0.8 | 0.5 | 1.3  | rs17737058     | 0.356 | 0.8 | 0.6 | 1.2  | rs1042838  | 0.424 | 0.6 | 0.1 | 2.3  |
| rs25531        | 0.337 | 1.5 | 0.7 | 3.2  | rs7978237      | 0.359 | 1.2 | 0.8 | 1.9  | rs1805055  | 0.431 | 0.8 | 0.4 | 1.5  |
| rs2272670      | 0.352 | 1.1 | 0.9 | 1.5  | rs4986934      | 0.362 | 1.4 | 0.7 | 2.6  | rs165599   | 0.435 | 0.8 | 0.4 | 1.4  |
| rs730154       | 0.358 | 1.2 | 0.8 | 1.6  | CP.ESR1.02.ESR | 0.366 | 0.4 | 0.1 | 2.9  | rs6094752  | 0.442 | 2.2 | 0.3 | 16.0 |
| rs11125744     | 0.360 | 0.8 | 0.6 | 1.2  | rs3020368      | 0.375 | 1.2 | 0.8 | 2.0  | rs506487   | 0.444 | 0.8 | 0.4 | 1.5  |
| rs4986934      | 0.362 | 1.4 | 0.7 | 2.6  | rs7116336      | 0.390 | 0.8 | 0.5 | 1.4  | rs7116336  | 0.457 | 0.5 | 0.1 | 3.4  |
| rs9902709      | 0.363 | 1.2 | 0.8 | 1.7  | rs3731628      | 0.394 | 1.3 | 0.7 | 2.1  | rs7997012  | 0.467 | 0.8 | 0.5 | 1.4  |
| rs1380896      | 0.365 | 1.2 | 0.8 | 1.6  | rs9436         | 0.405 | 0.8 | 0.6 | 1.3  | rs1952585  | 0.471 | 1.4 | 0.6 | 3.5  |
| CP.ESR1.02.ESR | 0.366 | 0.4 | 0.1 | 2.9  | rs6493497      | 0.413 | 0.8 | 0.5 | 1.3  | rs2033861  | 0.485 | 0.8 | 0.5 | 1.4  |
| rs2076546      | 0.373 | 0.8 | 0.5 | 1.3  | rs3020410      | 0.428 | 0.8 | 0.6 | 1.3  | rs2176807  | 0.488 | 1.2 | 0.8 | 1.8  |
| rs920418       | 0.380 | 0.9 | 0.7 | 1.2  | rs4738079      | 0.437 | 0.8 | 0.5 | 1.4  | rs1256059  | 0.492 | 1.2 | 0.7 | 1.9  |
| rs7978237      | 0.382 | 1.2 | 0.8 | 1.7  | rs9341066      | 0.440 | 1.2 | 0.7 | 2.1  | rs518162   | 0.499 | 0.5 | 0.1 | 3.7  |
| rs3731628      | 0.394 | 1.3 | 0.7 | 2.1  | rs1008805      | 0.453 | 0.9 | 0.6 | 1.3  | rs4646     | 0.508 | 0.8 | 0.3 | 1.7  |
| rs4738079      | 0.399 | 0.8 | 0.5 | 1.4  | rs9322336      | 0.467 | 1.2 | 0.8 | 1.7  | rs3853250  | 0.521 | 0.9 | 0.6 | 1.3  |
| rs9340817      | 0.399 | 0.7 | 0.3 | 1.6  | rs9902709      | 0.487 | 1.2 | 0.8 | 1.7  | rs1812730  | 0.522 | 0.9 | 0.5 | 1.4  |
| rs9479188      | 0.435 | 1.1 | 0.8 | 1.6  | rs2076546      | 0.499 | 0.8 | 0.5 | 1.4  | rs3742278  | 0.538 | 1.3 | 0.5 | 3.3  |
| rs2033861      | 0.435 | 0.9 | 0.7 | 1.2  | rs11125744     | 0.514 | 0.9 | 0.6 | 1.3  | rs140700   | 0.561 | 1.8 | 0.2 | 13.0 |
| rs2008691      | 0.448 | 1.1 | 0.8 | 1.6  | rs6306         | 0.538 | 1.2 | 0.7 | 2.0  | rs4870056  | 0.562 | 0.9 | 0.6 | 1.4  |
| rs3798758      | 0.450 | 1.3 | 0.7 | 2.5  | rs9340817      | 0.539 | 0.8 | 0.3 | 1.9  | rs9340941  | 0.568 | 0.8 | 0.4 | 1.6  |
| rs1256059      | 0.460 | 1.1 | 0.8 | 1.4  | rs2033861      | 0.547 | 0.9 | 0.6 | 1.4  | rs2229742  | 0.569 | 0.6 | 0.1 | 4.0  |
| rs1328685      | 0.467 | 0.8 | 0.5 | 1.4  | rs1380896      | 0.553 | 1.1 | 0.7 | 1.7  | rs9322331  | 0.573 | 1.2 | 0.7 | 2.0  |
| rs3853250      | 0.489 | 0.9 | 0.7 | 1.2  | rs2982734      | 0.557 | 1.1 | 0.8 | 1.7  | rs1256062  | 0.576 | 1.3 | 0.5 | 3.7  |
| rs936308       | 0.492 | 1.1 | 0.8 | 1.5  | rs1328685      | 0.561 | 0.9 | 0.5 | 1.4  | rs2077647  | 0.590 | 1.1 | 0.7 | 1.7  |
| rs10140457     | 0.498 | 0.8 | 0.3 | 1.7  | rs749292       | 0.565 | 1.1 | 0.7 | 1.7  | rs3778610  | 0.602 | 1.4 | 0.4 | 4.3  |
| rs6269         | 0.522 | 0.9 | 0.7 | 1.2  | rs9340941      | 0.568 | 0.8 | 0.4 | 1.6  | rs4818     | 0.617 | 0.9 | 0.5 | 1.5  |
| rs749292       | 0.524 | 1.1 | 0.8 | 1.4  | rs1042838      | 0.577 | 1.1 | 0.7 | 1.7  | rs2813543  | 0.619 | 0.8 | 0.4 | 1.8  |
| rs1256064      | 0.545 | 0.9 | 0.6 | 1.3  | rs17766755     | 0.580 | 0.9 | 0.6 | 1.3  | rs920418   | 0.629 | 0.9 | 0.6 | 1.4  |
| rs4870056      | 0.547 | 0.9 | 0.7 | 1.2  | rs1256059      | 0.586 | 1.1 | 0.7 | 1.7  | rs749292   | 0.662 | 1.1 | 0.7 | 1.8  |
| rs3020450      | 0.560 | 0.9 | 0.7 | 1.2  | rs1804645      | 0.593 | 1.2 | 0.6 | 2.3  | rs2653349  | 0.668 | 1.2 | 0.5 | 3.4  |
| rs1812730      | 0.568 | 0.9 | 0.7 | 1.2  | rs3020450      | 0.595 | 0.9 | 0.6 | 1.3  | rs3020376  | 0.686 | 1.1 | 0.7 | 1.9  |
| rs9340941      | 0.568 | 0.9 | 0.6 | 1.3  | rs28757184     | 0.600 | 0.8 | 0.3 | 1.9  | rs1256064  | 0.687 | 1.2 | 0.5 | 2.5  |
| rs2271933      | 0.577 | 1.1 | 0.8 | 1.4  | rs3853250      | 0.616 | 0.9 | 0.6 | 1.4  | rs2274705  | 0.702 | 1.3 | 0.4 | 4.0  |
| rs6493497      | 0.580 | 0.9 | 0.6 | 1.4  | rs4680         | 0.624 | 1.1 | 0.7 | 1.7  | rs3020450  | 0.704 | 0.9 | 0.4 | 1.7  |
| rs6306         | 0.584 | 1.2 | 0.7 | 1.9  | rs3798758      | 0.627 | 1.2 | 0.6 | 2.5  | rs750686   | 0.710 | 1.1 | 0.7 | 1.9  |
| rs9436         | 0.586 | 0.9 | 0.7 | 1.3  | rs2274705      | 0.629 | 1.1 | 0.7 | 1.8  | rs1709181  | 0.713 | 1.1 | 0.7 | 1.8  |
| rs2274705      | 0.592 | 1.1 | 0.8 | 1.7  | rs2274639      | 0.635 | 1.1 | 0.7 | 1.7  | rs3759811  | 0.732 | 0.9 | 0.5 | 1.6  |
| rs1804645      | 0.593 | 1.2 | 0.6 | 2.3  | rs516693       | 0.636 | 0.9 | 0.6 | 1.4  | rs17766755 | 0.733 | 1.1 | 0.6 | 2.0  |
| rs11571171     | 0.598 | 1.1 | 0.8 | 1.4  | rs6313         | 0.639 | 1.1 | 0.7 | 1.7  | rs4774585  | 0.743 | 1.2 | 0.5 | 2.9  |
| rs28757184     | 0.600 | 0.8 | 0.3 | 1.9  | rs11806980     | 0.657 | 1.1 | 0.6 | 2.1  | rs2228480  | 0.751 | 0.8 | 0.3 | 2.3  |
| rs1952585      | 0.646 | 1.1 | 0.8 | 1.6  | rs9340799      | 0.661 | 1.1 | 0.7 | 1.6  | rs9340835  | 0.767 | 0.9 | 0.5 | 1.7  |
| rs20551        | 0.654 | 0.9 | 0.7 | 1.3  | rs10459592     | 0.674 | 1.1 | 0.7 | 1.6  | rs9436     | 0.782 | 1.1 | 0.5 | 2.3  |
| rs2274639      | 0.657 | 1.1 | 0.8 | 1.6  | rs3742278      | 0.676 | 0.9 | 0.6 | 1.4  | rs7978237  | 0.788 | 1.2 | 0.4 | 3.7  |
| rs8003490      | 0.669 | 0.9 | 0.5 | 1.5  | rs4870056      | 0.678 | 0.9 | 0.6 | 1.4  | rs837935   | 0.789 | 1.1 | 0.6 | 1.9  |
| rs4680         | 0.670 | 1.1 | 0.8 | 1.4  | rs2653349      | 0.683 | 0.9 | 0.6 | 1.4  | rs9341004  | 0.804 | 0.8 | 0.1 | 5.6  |
| rs727479       | 0.671 | 0.9 | 0.7 | 1.2  | rs9322338      | 0.684 | 0.9 | 0.5 | 1.7  | rs944045   | 0.825 | 1.1 | 0.4 | 3.7  |
| rs2982734      | 0.674 | 1.1 | 0.8 | 1.4  | IU08.E2.02     | 0.684 | 0.9 | 0.5 | 1.5  | rs165815   | 0.831 | 1.1 | 0.4 | 2.7  |
| rs3020410      | 0.682 | 0.9 | 0.6 | 1.4  | rs936308       | 0.686 | 1.1 | 0.7 | 1.6  | rs2414096  | 0.833 | 0.9 | 0.6 | 1.6  |
| rs867239       | 0.690 | 1.2 | 0.5 | 2.5  | rs867239       | 0.690 | 1.2 | 0.5 | 2.5  | rs4680     | 0.841 | 1.0 | 0.7 | 1.6  |
| rs9322331      | 0.693 | 1.1 | 0.8 | 1.4  | rs500760       | 0.700 | 1.1 | 0.7 | 1.6  | rs8006145  | 0.864 | 0.9 | 0.5 | 1.9  |
| rs2077647      | 0.696 | 1.1 | 0.8 | 1.4  | rs2083389      | 0.705 | 0.9 | 0.6 | 1.4  | rs4986938  | 0.867 | 1.0 | 0.6 | 1.6  |
| rs2083389      | 0.697 | 1.1 | 0.8 | 1.5  | rs2302427      | 0.706 | 1.1 | 0.7 | 1.9  | rs700518   | 0.870 | 1.0 | 0.6 | 1.6  |
| rs396221       | 0.703 | 1.1 | 0.8 | 1.4  | rs8003490      | 0.726 | 0.9 | 0.5 | 1.6  | rs6311     | 0.873 | 1.0 | 0.6 | 1.6  |
| rs25532        | 0.707 | 0.9 | 0.6 | 1.4  | rs6930355      | 0.729 | 1.1 | 0.7 | 1.6  | rs4633     | 0.881 | 1.0 | 0.7 | 1.6  |
| rs2229742      | 0.715 | 0.9 | 0.6 | 1.4  | rs3020371      | 0.731 | 1.1 | 0.7 | 1.6  | rs10046    | 0.886 | 1.0 | 0.7 | 1.6  |
| rs4818         | 0.718 | 0.9 | 0.7 | 1.3  | IU08.E2.01     | 0.731 | 1.4 | 0.2 | 10.3 | rs1884049  | 0.891 | 0.9 | 0.4 | 2.3  |
| rs2176807      | 0.730 | 1.0 | 0.8 | 1.4  | rs1062033      | 0.731 | 1.1 | 0.7 | 1.6  | rs730154   | 0.892 | 1.1 | 0.4 | 2.6  |
| IU08.E2.01     | 0.731 | 1.4 | 0.2 | 10.3 | rs2229840      | 0.738 | 0.9 | 0.6 | 1.4  | rs6930355  | 0.893 | 0.9 | 0.3 | 2.9  |
| rs3778610      | 0.737 | 1.1 | 0.7 | 1.8  | rs4986938      | 0.748 | 0.9 | 0.7 | 1.4  | rs867443   | 0.894 | 0.9 | 0.4 | 2.0  |
| rs500760       | 0.741 | 1.1 | 0.8 | 1.4  | rs837935       | 0.748 | 0.9 | 0.6 | 1.4  | rs594242   | 0.898 | 0.9 | 0.4 | 2.3  |
| rs6313         | 0.744 | 1.0 | 0.8 | 1.4  | rs2272670      | 0.750 | 1.1 | 0.7 | 1.6  | rs1709182  | 0.901 | 1.0 | 0.6 | 1.7  |

|                |       |           |     |     |                |       |           |     |     |                |       |           |     |     |
|----------------|-------|-----------|-----|-----|----------------|-------|-----------|-----|-----|----------------|-------|-----------|-----|-----|
| rs6295         | 0.746 | 1.0       | 0.8 | 1.4 | rs3759811      | 0.751 | 1.1       | 0.7 | 1.7 | rs10459592     | 0.902 | 1.0       | 0.6 | 1.5 |
| rs4986938      | 0.755 | 1.0       | 0.7 | 1.3 | rs2289105      | 0.756 | 0.9       | 0.6 | 1.4 | rs2274639      | 0.918 | 1.1       | 0.3 | 3.3 |
| rs1256031      | 0.765 | 1.0       | 0.8 | 1.4 | rs1812730      | 0.761 | 0.9       | 0.6 | 1.4 | rs2289105      | 0.927 | 1.0       | 0.7 | 1.6 |
| rs750686       | 0.786 | 1.0       | 0.8 | 1.4 | rs1256031      | 0.763 | 0.9       | 0.6 | 1.4 | rs165774       | 0.929 | 1.0       | 0.5 | 1.8 |
| rs6920483      | 0.793 | 1.1       | 0.5 | 2.8 | rs4775936      | 0.767 | 1.1       | 0.7 | 1.6 | rs500760       | 0.938 | 1.0       | 0.5 | 2.0 |
| rs6930355      | 0.797 | 1.0       | 0.7 | 1.5 | rs6094752      | 0.770 | 0.9       | 0.5 | 1.7 | rs2234693      | 0.940 | 1.0       | 0.6 | 1.5 |
| rs17766755     | 0.800 | 1.0       | 0.7 | 1.3 | rs3798565      | 0.789 | 1.1       | 0.7 | 1.6 | rs4775936      | 0.940 | 1.0       | 0.6 | 1.6 |
| rs3798565      | 0.805 | 1.0       | 0.7 | 1.3 | rs2008691      | 0.789 | 1.1       | 0.7 | 1.5 | rs9479188      | 0.949 | 1.0       | 0.4 | 2.6 |
| rs3088092      | 0.807 | 1.1       | 0.6 | 1.9 | rs6920483      | 0.793 | 1.1       | 0.5 | 2.8 | rs3020371      | 0.952 | 1.0       | 0.6 | 1.7 |
| rs1062033      | 0.808 | 1.0       | 0.8 | 1.4 | rs1952585      | 0.804 | 1.1       | 0.7 | 1.7 | rs6313         | 0.987 | 1.0       | 0.6 | 1.6 |
| rs2302427      | 0.821 | 1.1       | 0.6 | 1.8 | rs2229742      | 0.818 | 0.9       | 0.6 | 1.5 | rs1062033      | 0.992 | 1.0       | 0.6 | 1.7 |
| rs2653349      | 0.822 | 1.0       | 0.7 | 1.4 | rs396221       | 0.824 | 1.0       | 0.6 | 1.5 | rs2076546      | 0.993 | 303776164 | 0.0 | Inf |
| rs3020371      | 0.828 | 1.0       | 0.8 | 1.4 | rs926848       | 0.842 | 1.1       | 0.5 | 2.1 | rs11849538     | 0.993 | '37867351 | 0.0 | Inf |
| rs9322338      | 0.829 | 1.1       | 0.7 | 1.6 | rs727479       | 0.846 | 1.0       | 0.7 | 1.5 | rs9340817      | 0.993 | 32357622  | 0.0 | Inf |
| rs2230782      | 0.832 | 1.1       | 0.6 | 1.7 | rs6311         | 0.846 | 1.0       | 0.7 | 1.6 | rs944460       | 0.993 | 167457007 | 0.0 | Inf |
| rs1042838      | 0.840 | 1.0       | 0.7 | 1.5 | rs2230782      | 0.851 | 0.9       | 0.6 | 1.6 | rs2747648      | 0.993 | 716232382 | 0.0 | Inf |
| rs10459592     | 0.841 | 1.0       | 0.8 | 1.3 | rs867443       | 0.852 | 1.0       | 0.7 | 1.5 | rs1062577      | 0.994 | 73792192  | 0.0 | Inf |
| rs9340958      | 0.862 | 1.0       | 0.6 | 1.8 | rs2271933      | 0.855 | 1.0       | 0.7 | 1.5 | rs2302427      | 0.994 | 41505781  | 0.0 | Inf |
| rs11806980     | 0.863 | 1.1       | 0.6 | 1.8 | rs3778610      | 0.859 | 1.1       | 0.5 | 2.0 | rs926848       | 0.994 | 199933277 | 0.0 | Inf |
| rs6308         | 0.863 | 1.2       | 0.2 | 8.6 | rs2097903      | 0.863 | 1.0       | 0.6 | 1.5 | CP.ESR1.01.ESR | 0.994 | 71568756  | 0.0 | Inf |
| rs3020376      | 0.864 | 1.0       | 0.8 | 1.3 | rs6308         | 0.863 | 1.2       | 0.2 | 8.6 | rs8003490      | 0.994 | '22677475 | 0.0 | Inf |
| rs17737058     | 0.865 | 1.0       | 0.7 | 1.4 | rs9322331      | 0.864 | 1.0       | 0.7 | 1.5 | rs4738079      | 0.994 | 281551718 | 0.0 | Inf |
| rs9341070      | 0.869 | 0.9       | 0.1 | 5.6 | rs2234693      | 0.877 | 1.0       | 0.6 | 1.5 | rs11806980     | 0.994 | 184690038 | 0.0 | Inf |
| rs4775936      | 0.872 | 1.0       | 0.8 | 1.3 | rs4818         | 0.884 | 1.0       | 0.6 | 1.5 | rs1328685      | 0.994 | 103168445 | 0.0 | Inf |
| IU08.E2.02     | 0.878 | 1.0       | 0.6 | 1.6 | rs2414096      | 0.884 | 1.0       | 0.6 | 1.7 | rs9341070      | 0.994 | '58745878 | 0.0 | Inf |
| rs2289105      | 0.888 | 1.0       | 0.7 | 1.3 | CP.ESR1.04.ESR | 0.894 | 0.9       | 0.1 | 6.3 | rs9341072      | 0.995 | 65887015  | 0.0 | Inf |
| rs944045       | 0.888 | 1.0       | 0.7 | 1.5 | rs750686       | 0.907 | 1.0       | 0.7 | 1.5 | rs16965628     | 0.995 | 60688213  | 0.0 | Inf |
| rs10046        | 0.888 | 1.0       | 0.8 | 1.3 | rs9341070      | 0.908 | 0.9       | 0.1 | 6.4 | rs6306         | 0.995 | 357478611 | 0.0 | Inf |
| rs2234693      | 0.889 | 1.0       | 0.8 | 1.3 | rs752760       | 0.910 | 1.0       | 0.6 | 1.5 | rs9341077      | 0.995 | 514916357 | 0.0 | Inf |
| CP.ESR1.04.ESR | 0.894 | 0.9       | 0.1 | 6.3 | rs6269         | 0.911 | 1.0       | 0.7 | 1.4 | rs2228591      | 0.995 | 48382467  | 0.0 | Inf |
| rs6094752      | 0.898 | 1.0       | 0.6 | 1.7 | rs2077647      | 0.911 | 1.0       | 0.7 | 1.5 | rs2982734      | 0.999 | 1.0       | 0.6 | 1.7 |
| rs3742278      | 0.901 | 1.0       | 0.7 | 1.4 | rs20551        | 0.913 | 1.0       | 0.7 | 1.5 | rs3731628      | NA    | NA        | NA  | NA  |
| rs837935       | 0.916 | 1.0       | 0.7 | 1.3 | rs140700       | 0.917 | 1.0       | 0.6 | 1.6 | rs1804645      | NA    | NA        | NA  | NA  |
| rs867443       | 0.923 | 1.0       | 0.8 | 1.4 | rs2176807      | 0.926 | 1.0       | 0.7 | 1.5 | rs1800046      | NA    | NA        | NA  | NA  |
| rs1256049      | 0.940 | 1.0       | 0.5 | 2.0 | rs10046        | 0.933 | 1.0       | 0.7 | 1.6 | CP.ESR1.02.ESR | NA    | NA        | NA  | NA  |
| rs926848       | 0.946 | 1.0       | 0.5 | 2.0 | rs944045       | 0.936 | 1.0       | 0.6 | 1.7 | CP.ESR1.04.ESR | NA    | NA        | NA  | NA  |
| rs516693       | 0.954 | 1.0       | 0.7 | 1.5 | rs1256049      | 0.940 | 1.0       | 0.5 | 2.0 | rs11963577     | NA    | NA        | NA  | NA  |
| rs700518       | 0.957 | 1.0       | 0.8 | 1.3 | rs8006145      | 0.946 | 1.0       | 0.7 | 1.5 | rs867239       | NA    | NA        | NA  | NA  |
| rs41513044     | 0.962 | 1.0       | 0.3 | 3.2 | rs700518       | 0.951 | 1.0       | 0.7 | 1.5 | rs6920483      | NA    | NA        | NA  | NA  |
| rs6311         | 0.967 | 1.0       | 0.8 | 1.3 | rs41513044     | 0.962 | 1.0       | 0.3 | 3.2 | rs4986934      | NA    | NA        | NA  | NA  |
| rs2414096      | 0.977 | 1.0       | 0.7 | 1.4 | rs11571171     | 0.965 | 1.0       | 0.7 | 1.4 | rs9322348      | NA    | NA        | NA  | NA  |
| rs3759811      | 0.985 | 1.0       | 0.7 | 1.3 | rs3020376      | 0.975 | 1.0       | 0.7 | 1.5 | rs6308         | NA    | NA        | NA  | NA  |
| rs8006145      | 0.986 | 1.0       | 0.7 | 1.3 | rs3088092      | 0.976 | 1.0       | 0.6 | 1.8 | IU08.E2.01     | NA    | NA        | NA  | NA  |
| rs2229840      | 0.989 | 1.0       | 0.7 | 1.5 | rs9340958      | 0.986 | 1.0       | 0.6 | 1.7 | rs1256049      | NA    | NA        | NA  | NA  |
| rs9341072      | 0.995 | 0.0       | 0.0 | Inf | CP.ESR1.01.ESR | 0.993 | 996986445 | 0.0 | Inf | rs28757184     | NA    | NA        | NA  | NA  |
| rs1800046      | 0.995 | 105528829 | 0.0 | Inf | rs9341072      | 0.995 | 565887015 | 0.0 | Inf | rs1073093      | NA    | NA        | NA  | NA  |
| CP.ESR1.01.ESR | 0.995 | 358156747 | 0.0 | Inf | rs1800046      | 0.995 | 105528829 | 0.0 | Inf | rs61753150     | NA    | NA        | NA  | NA  |
| rs140700       | 0.996 | 1.0       | 0.6 | 1.6 | rs1065822      | 0.999 | 1.0       | 0.7 | 1.5 | rs25531        | NA    | NA        | NA  | NA  |
| rs9322348      | NA    | NA        | NA  | NA  | rs9322348      | NA    | NA        | NA  | NA  | rs41513044     | NA    | NA        | NA  | NA  |
